# Supplementary material for: Visible-light-induced chemoselective reductive decarboxylative alkynylation under biomolecule-compatible conditions
Source: Royal Society of Chemistry journal article supplement (doi:10.1039/c4cc06344a), 2014-10-03

**Visible-Light-Induced Chemoselective Reductive Decarboxylative Alkynylation  
under Biomolecule-Compatible Conditions**

Jie Yang, Jing Zhang, Li Qi, and Yiyun Chen\*

**Supplementary Information**

**NMR Spectra of New Compounds**

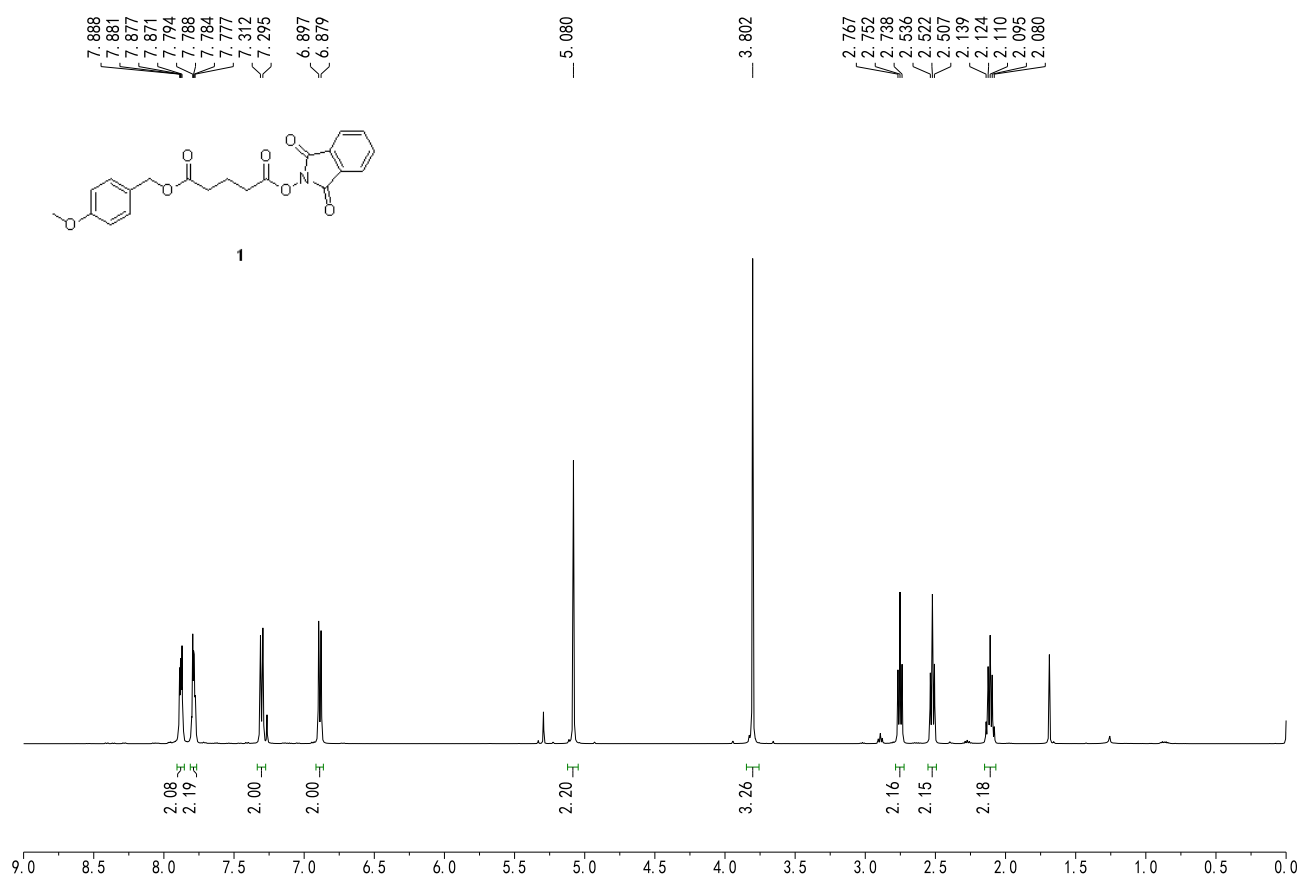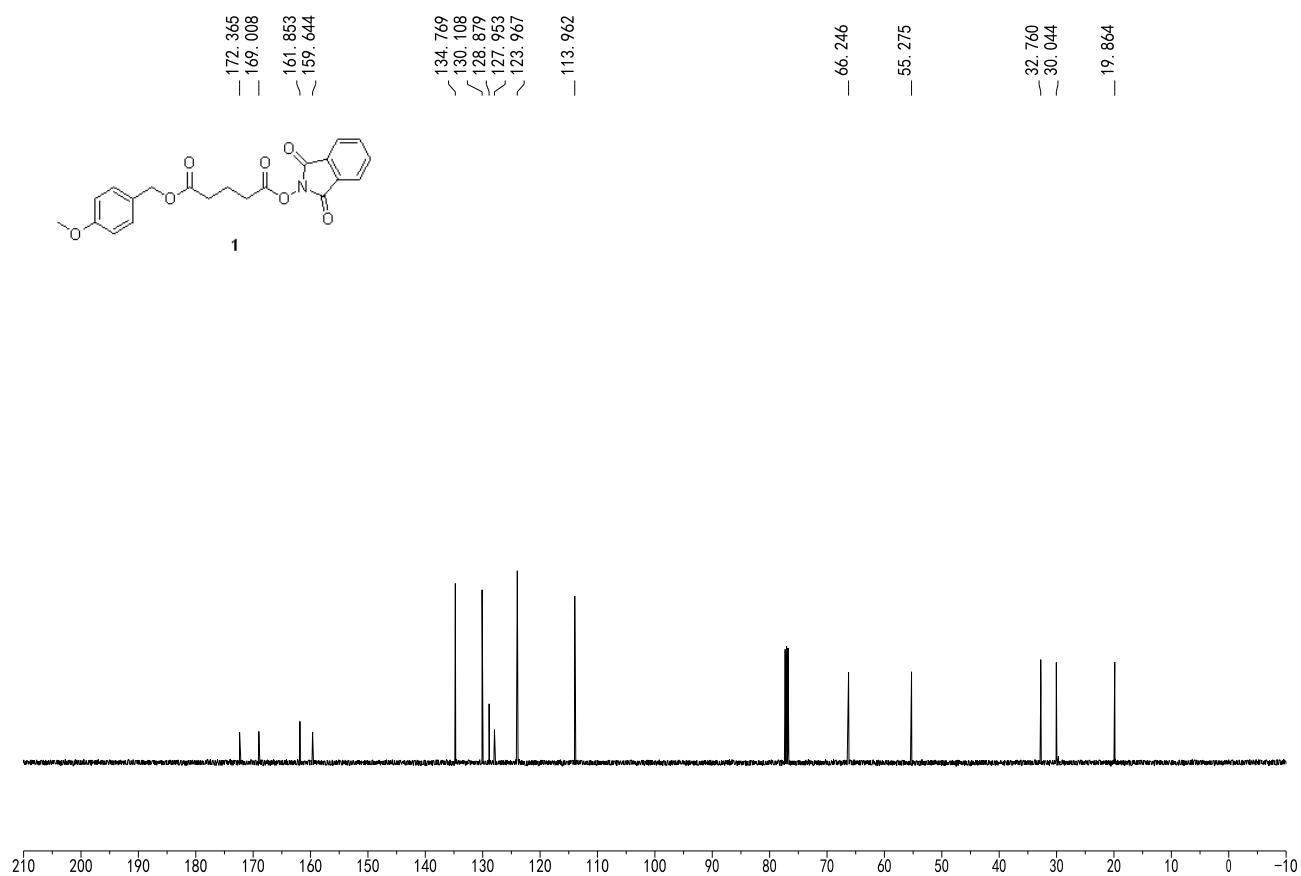

2012310YJ-13-64- H C, 10, f1d

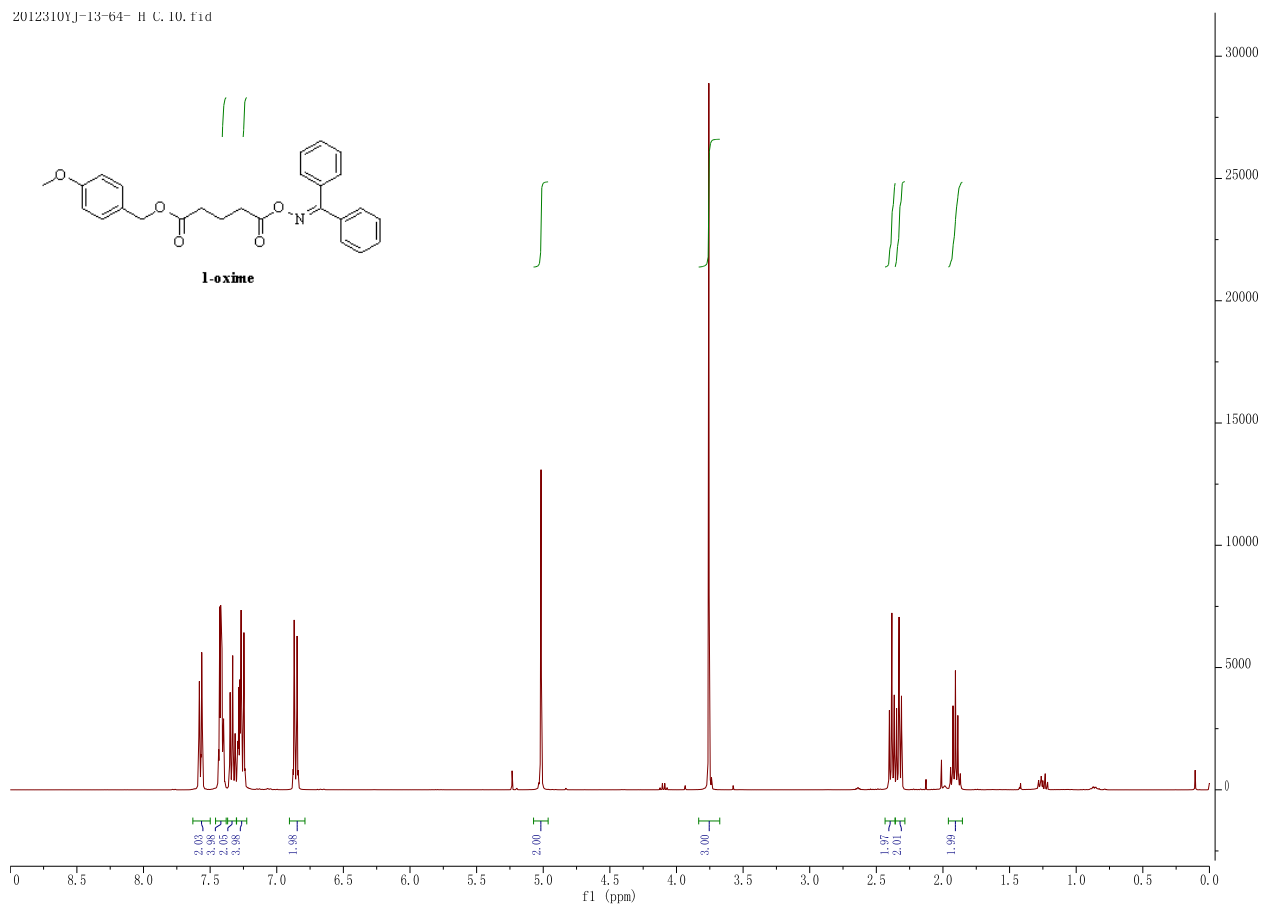

2012310YJ-13-64- H C, 11, f1d

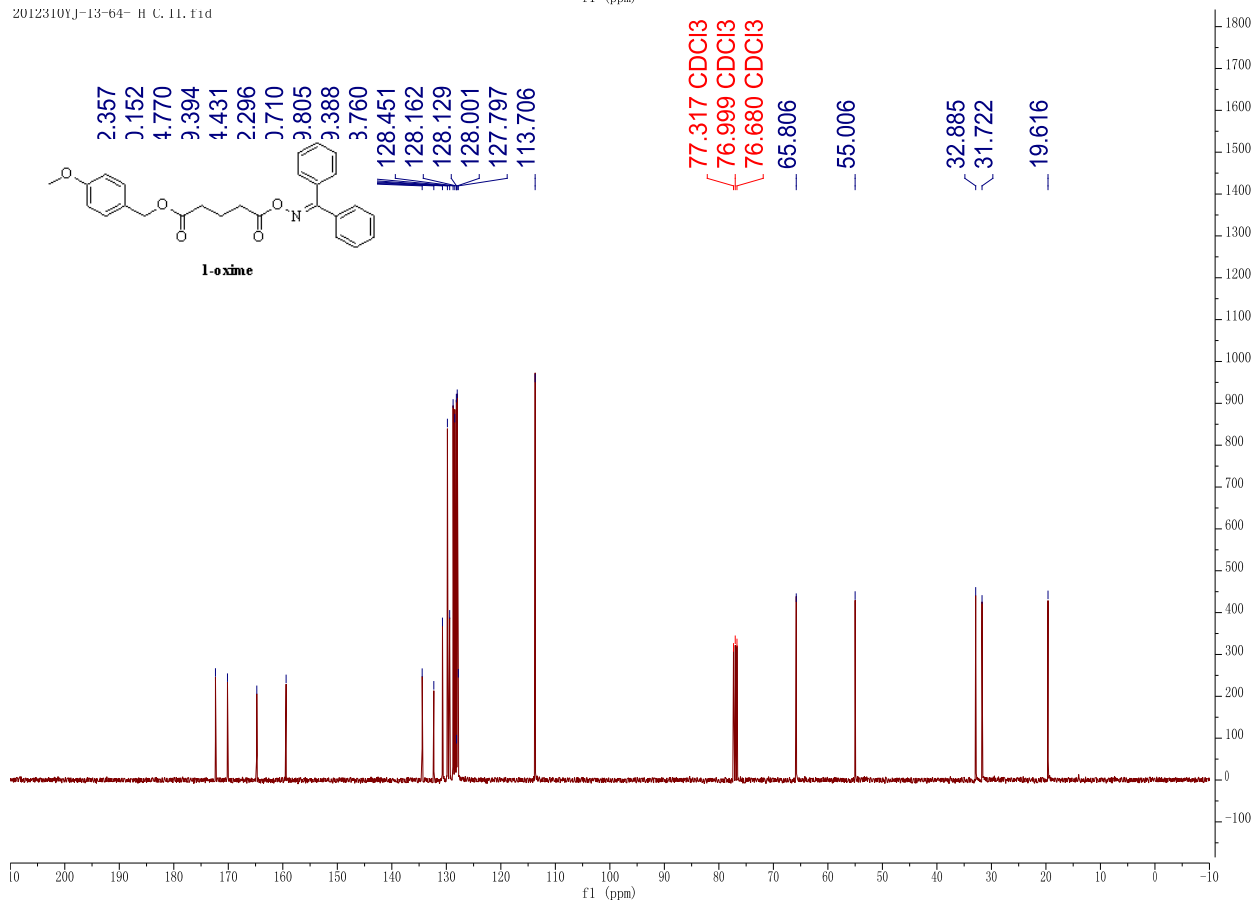

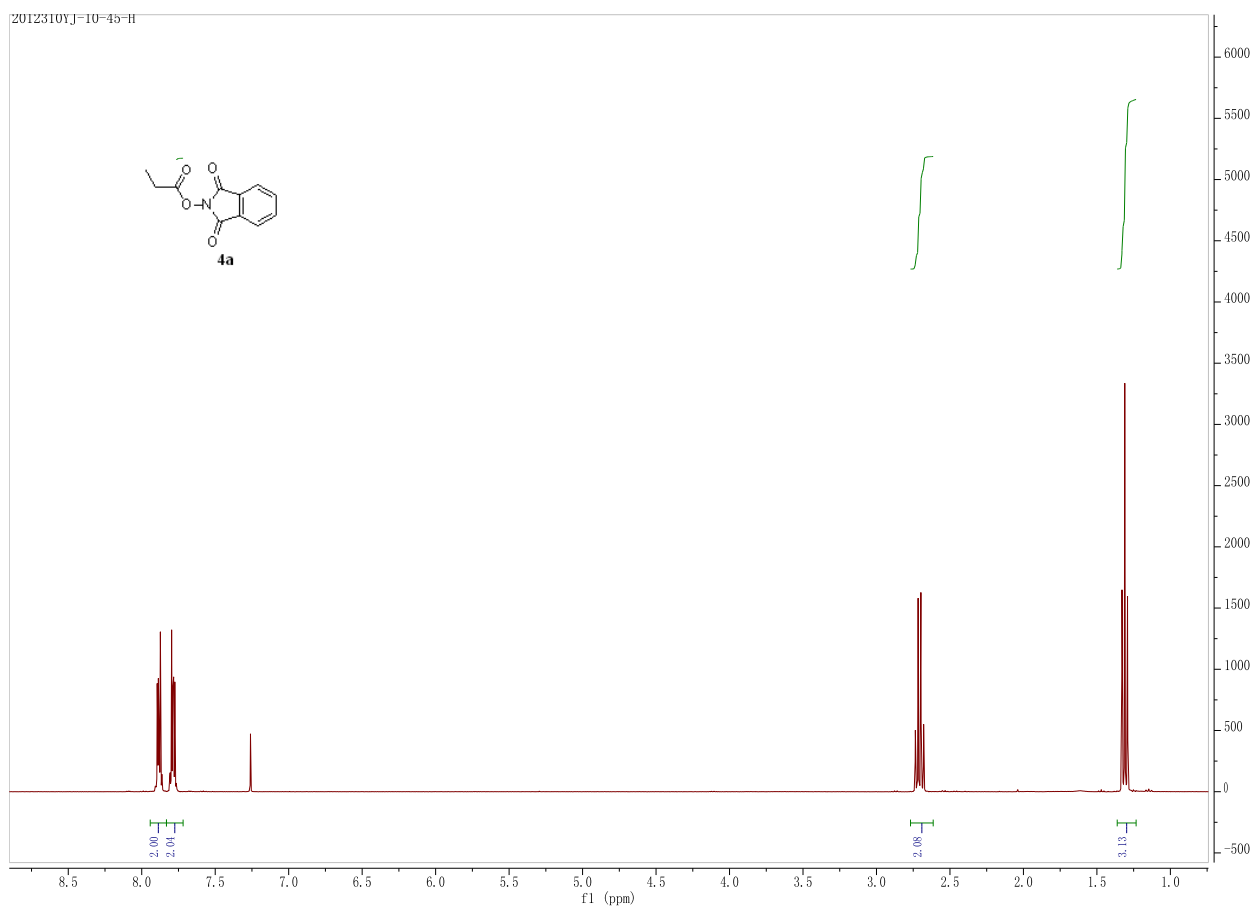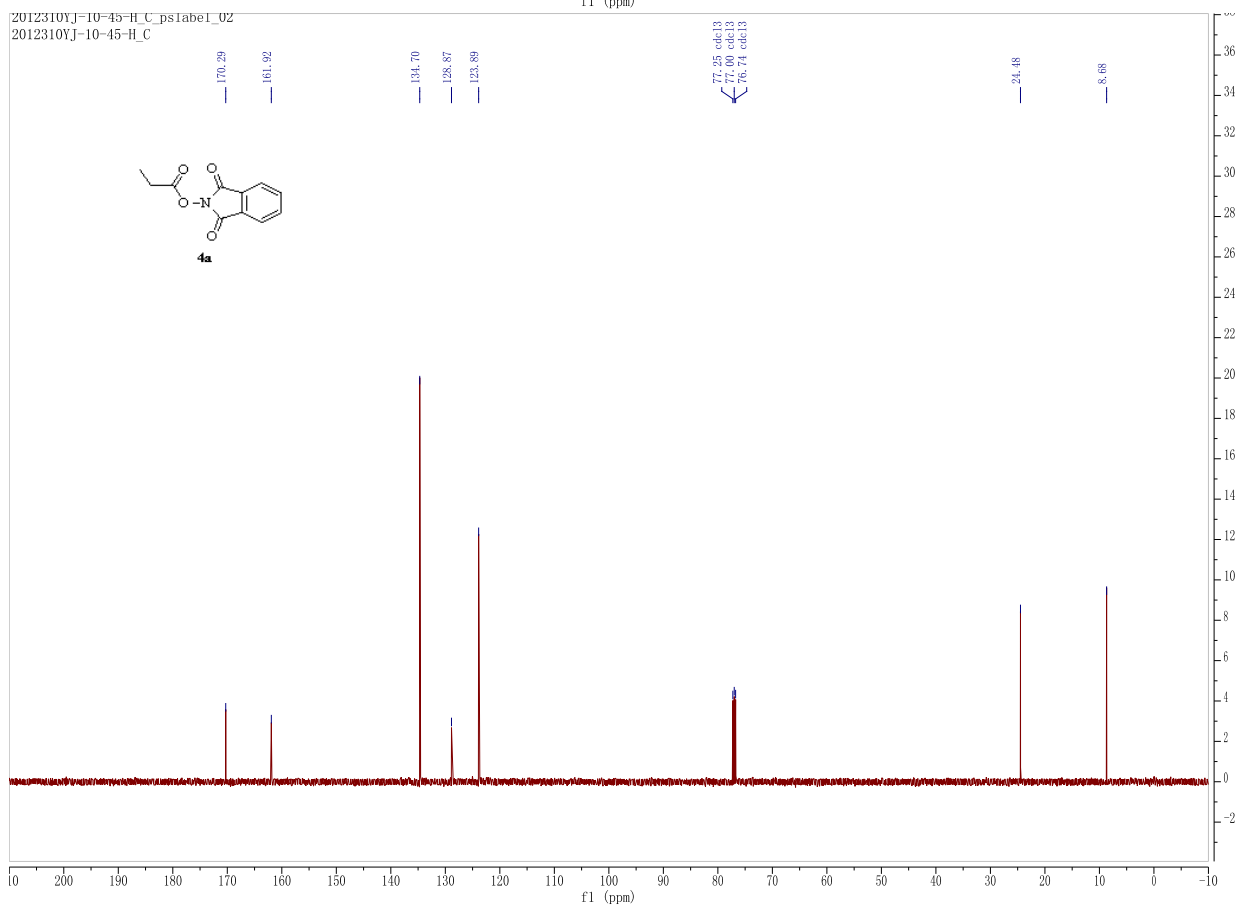



2012310VJ-VI-41-H C

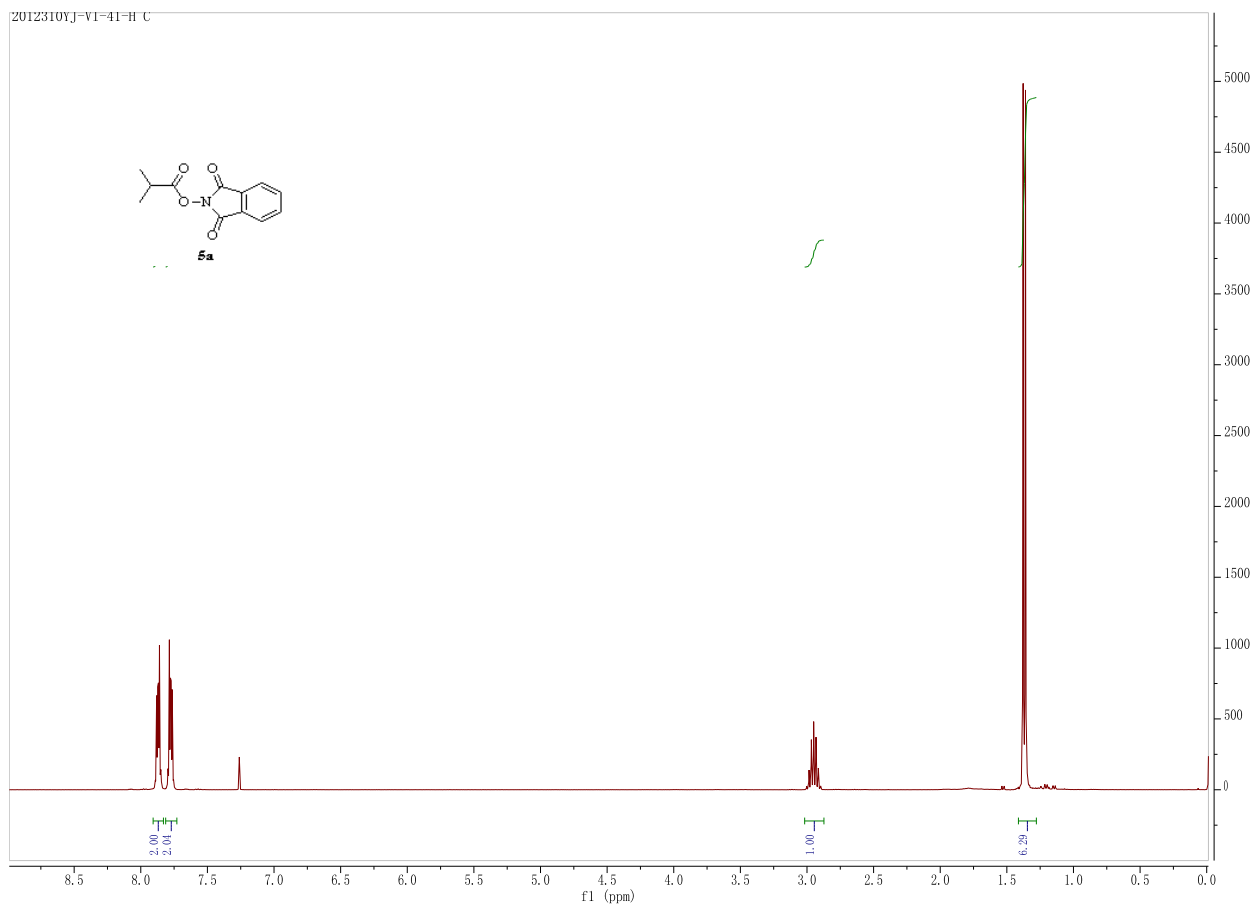

2012310VJ-VI-41-H C

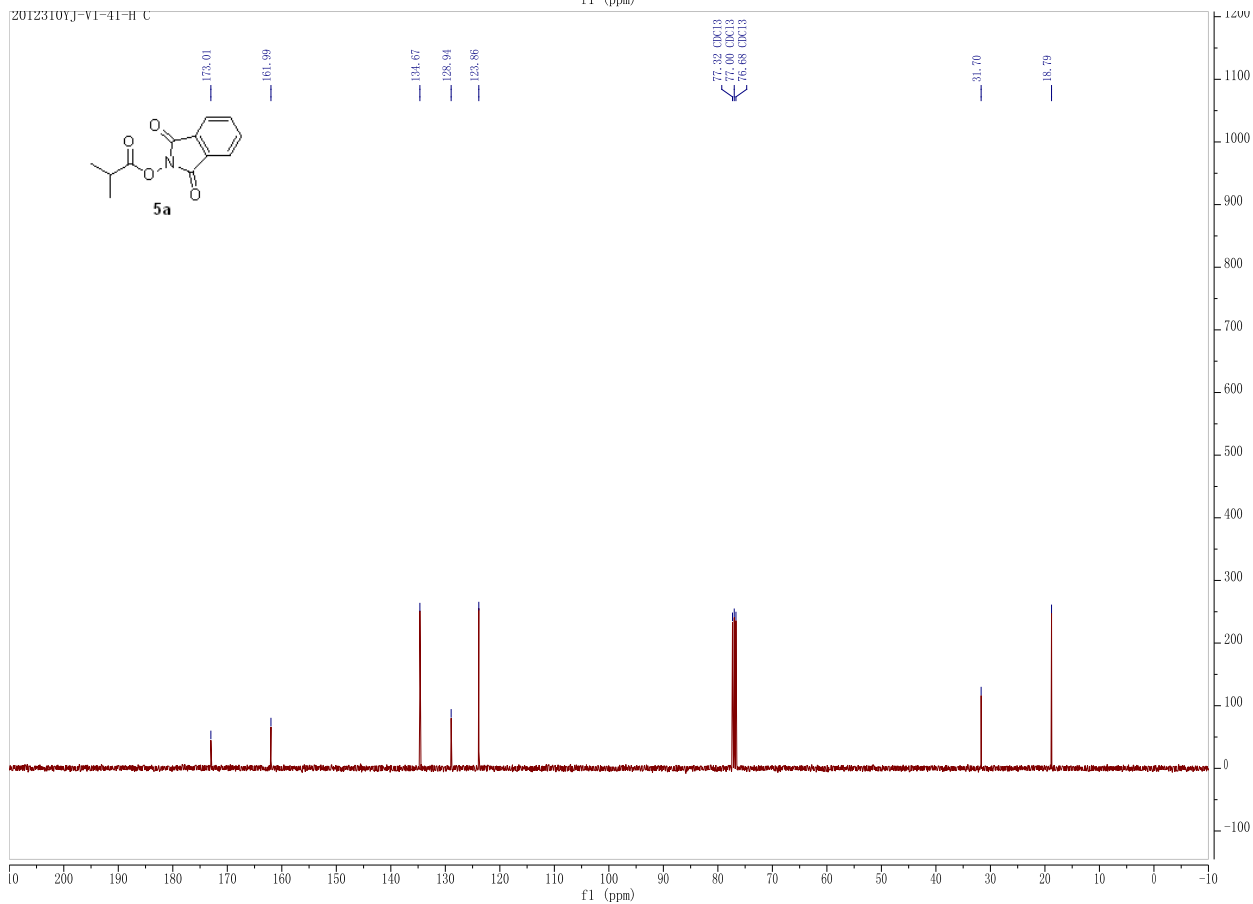

2011177HCC-V-14-H, 10, F1d

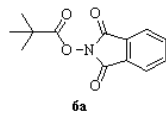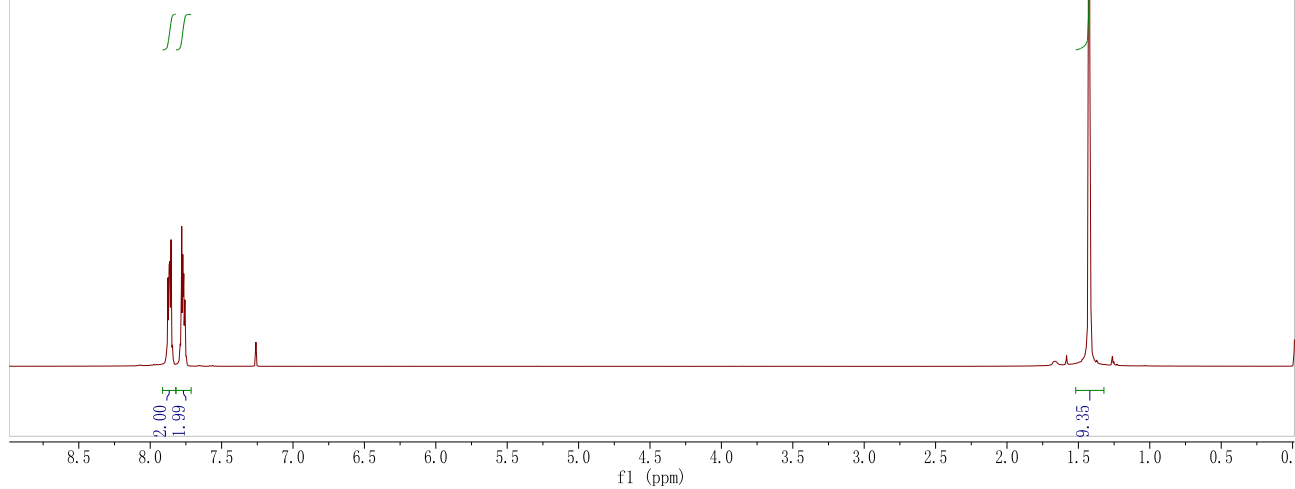

2011177HCC-V-14-C, 10, F1d

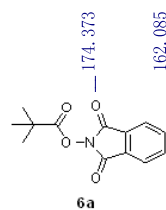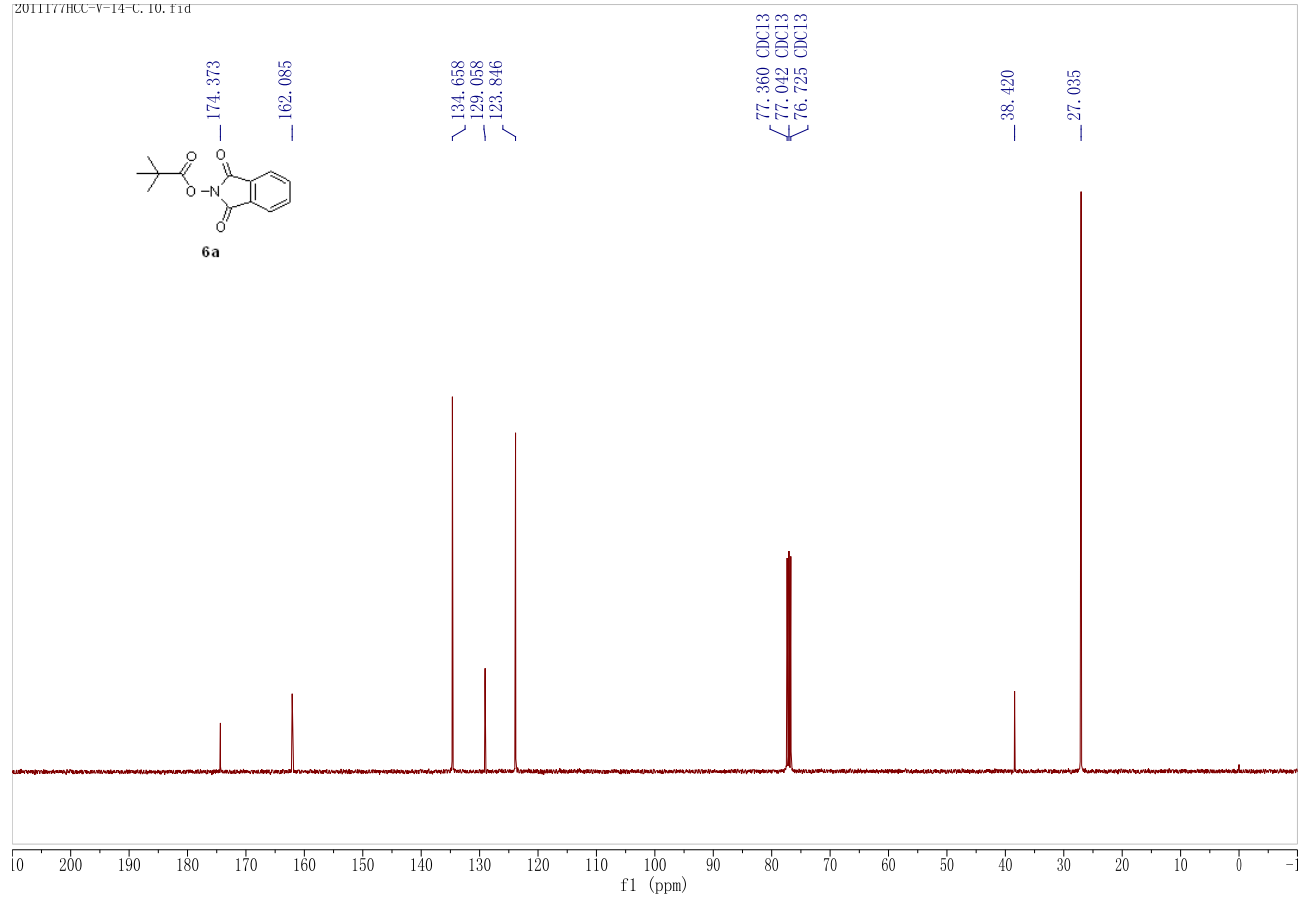

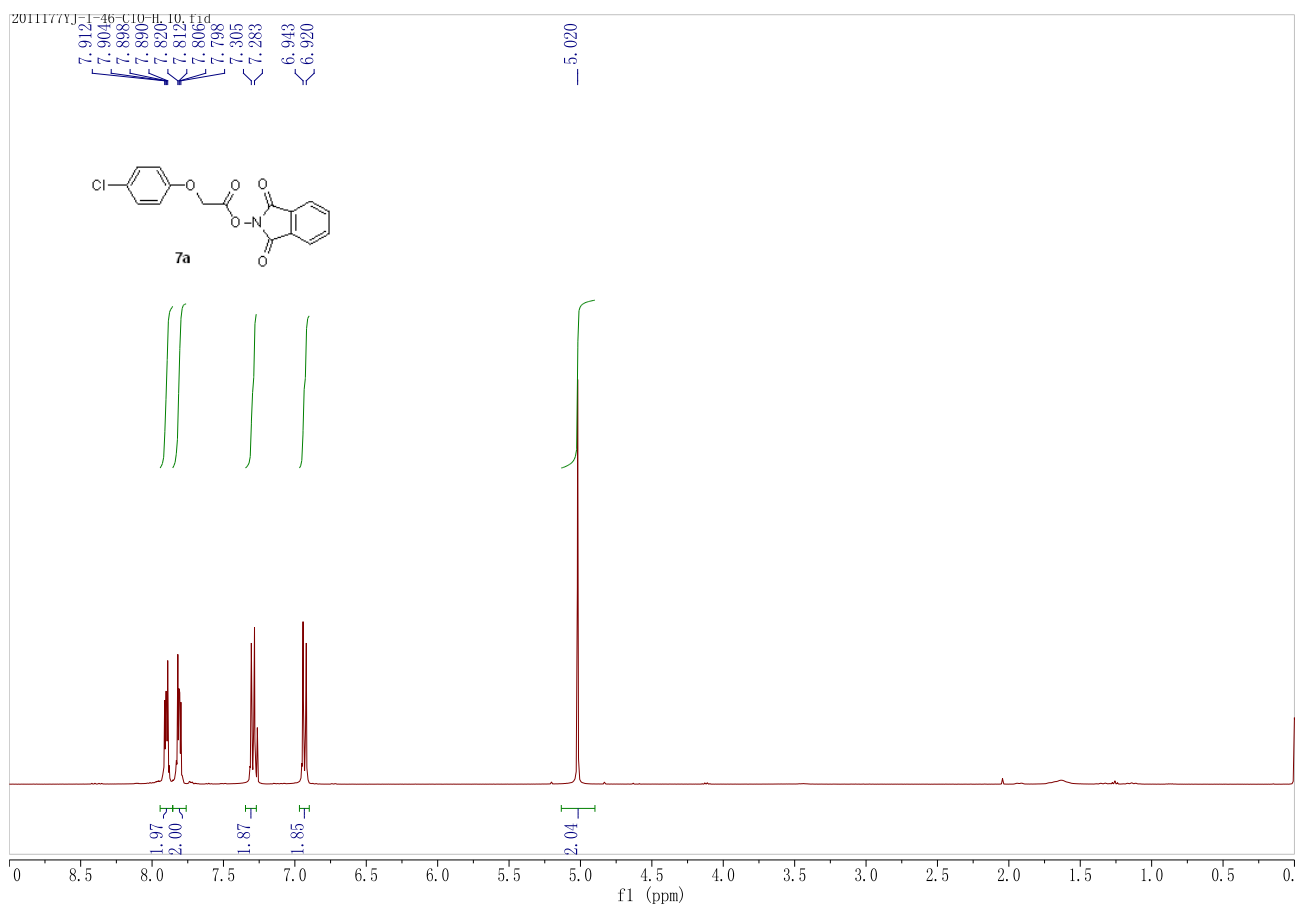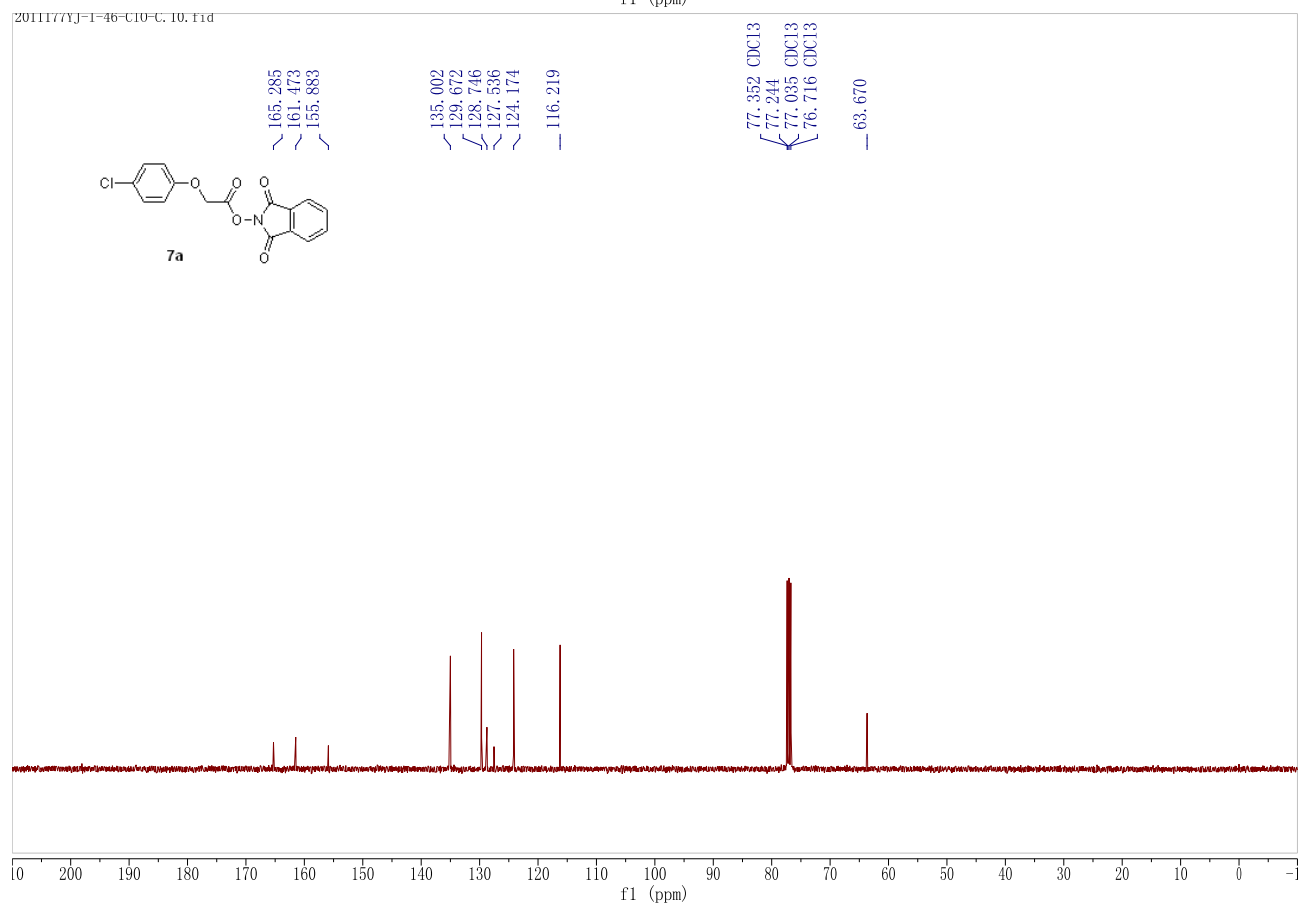

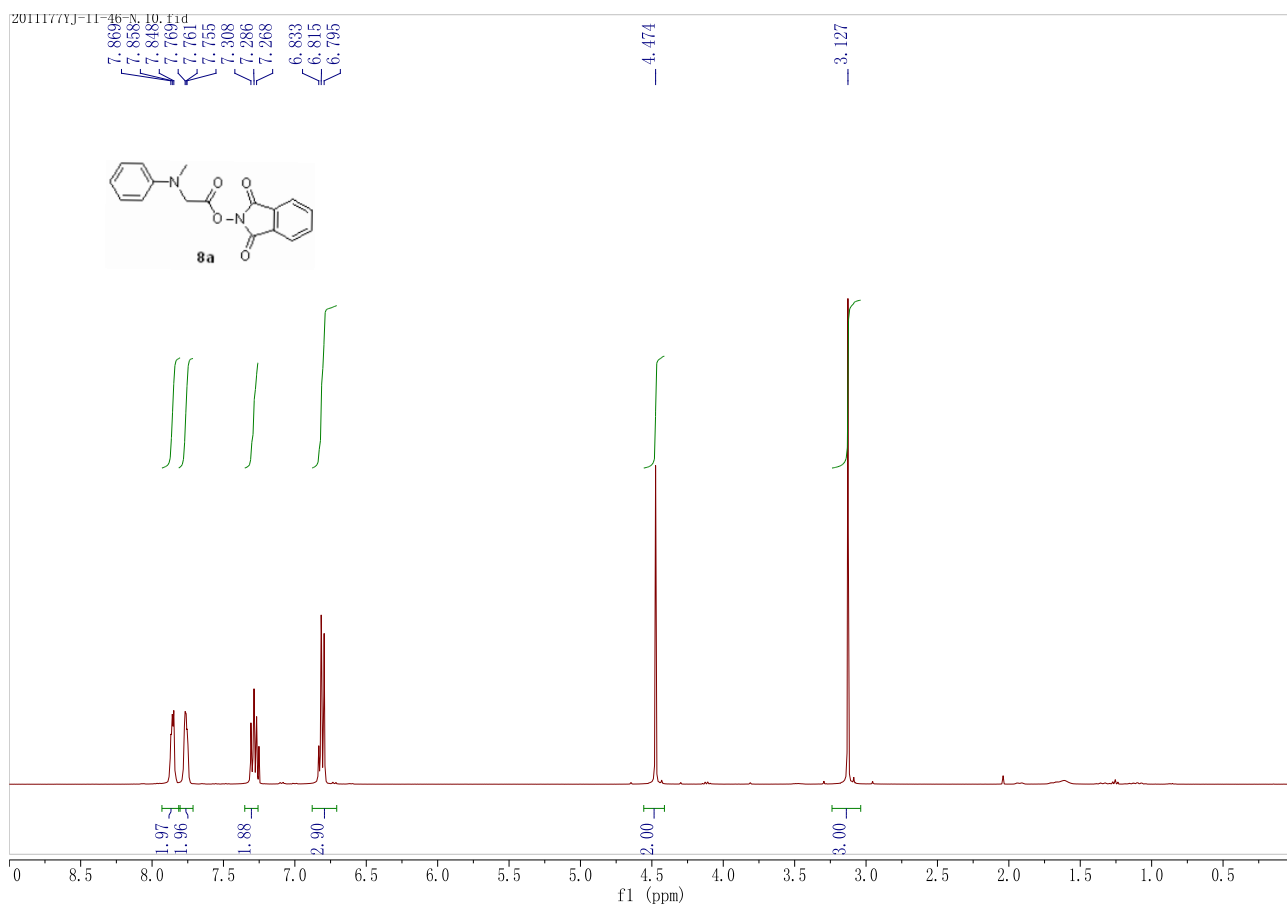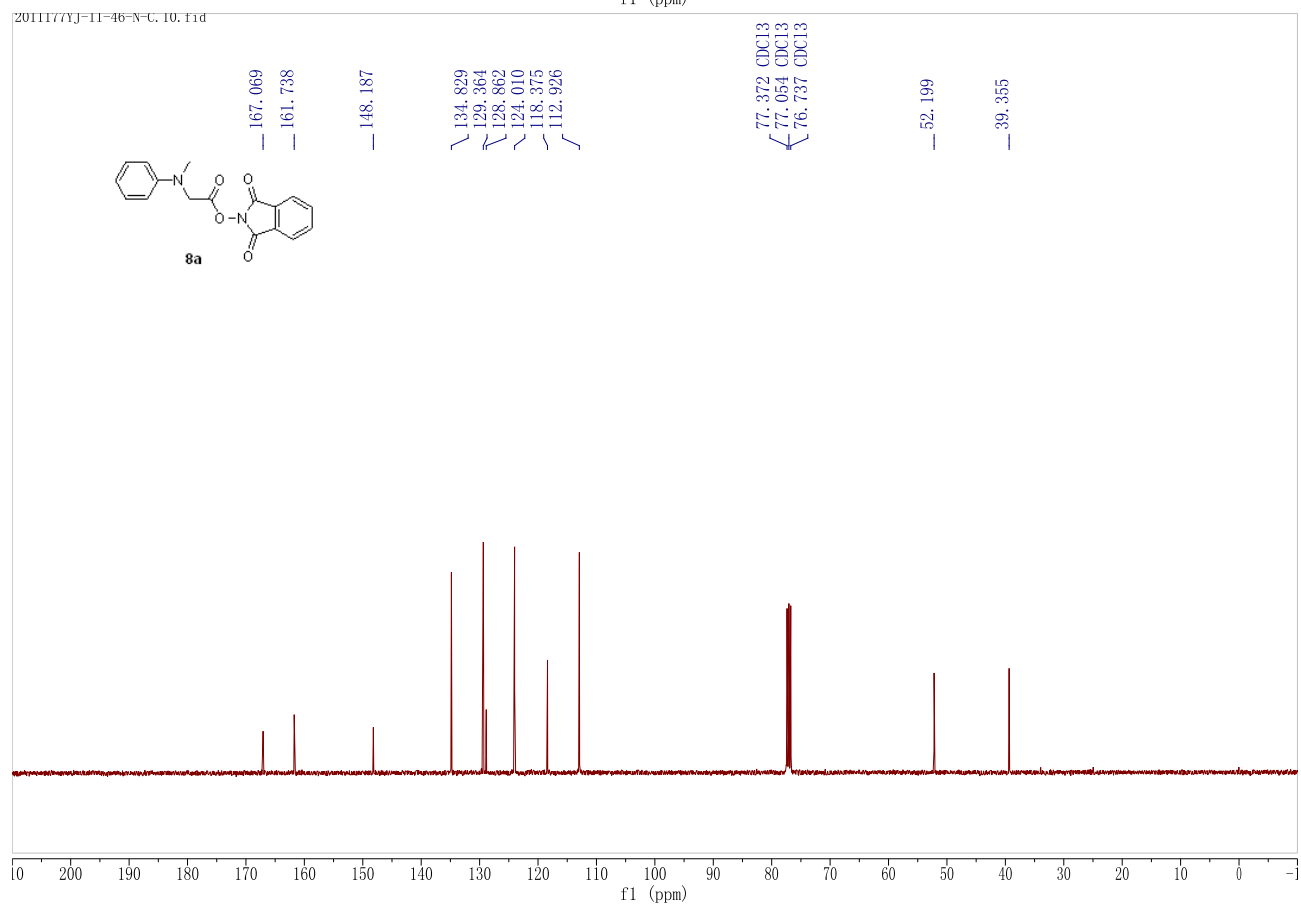

2012310ZJ-1-61

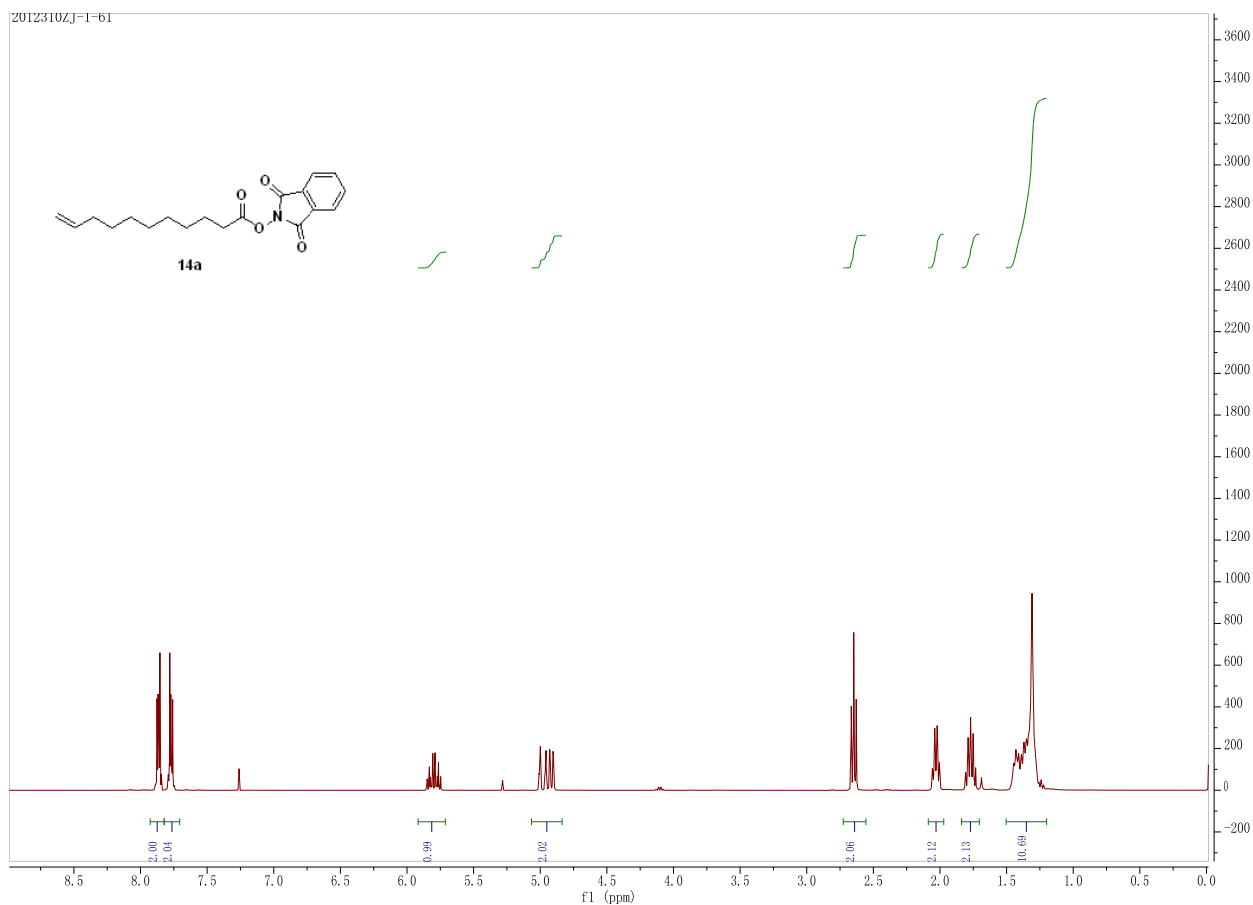

2012158ZJ-1-61New carbon

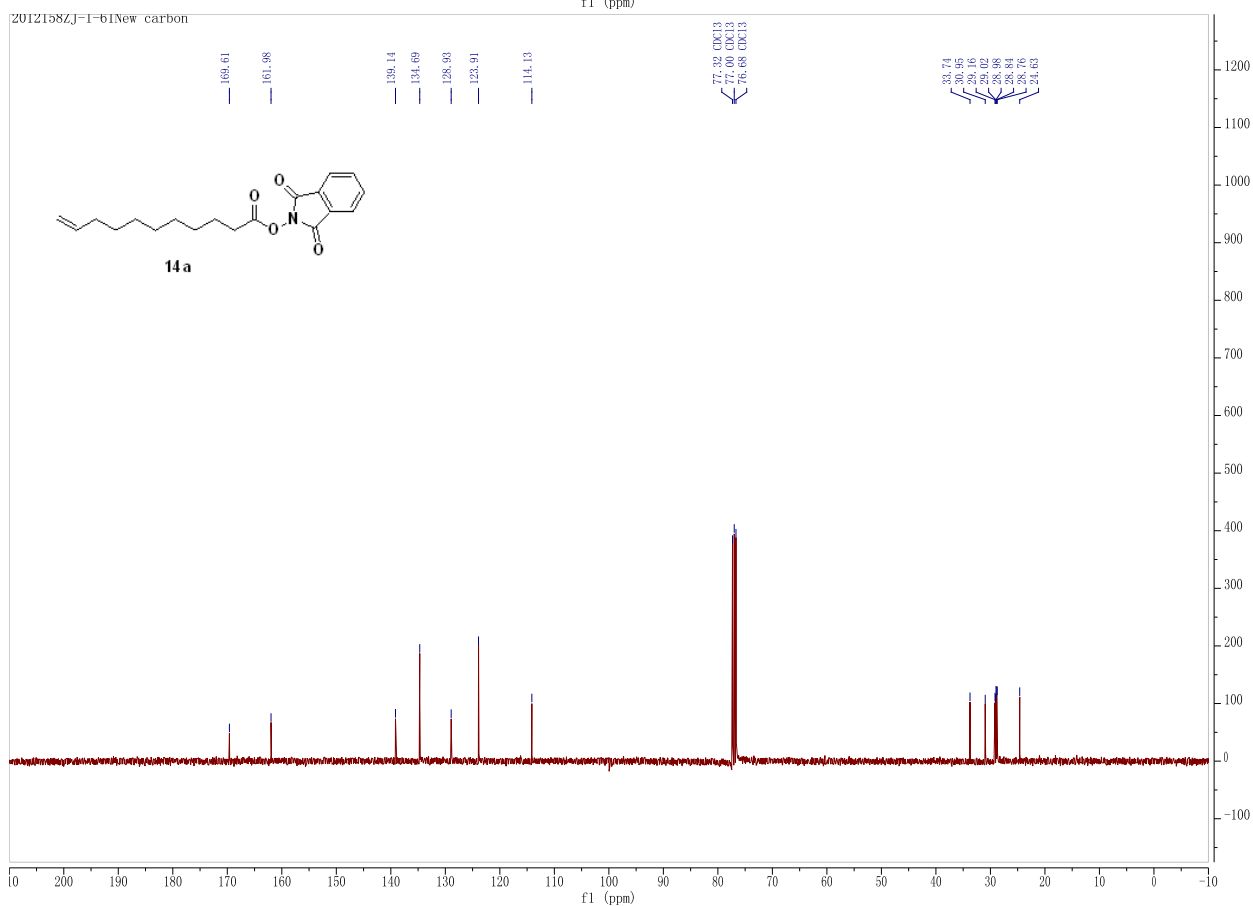

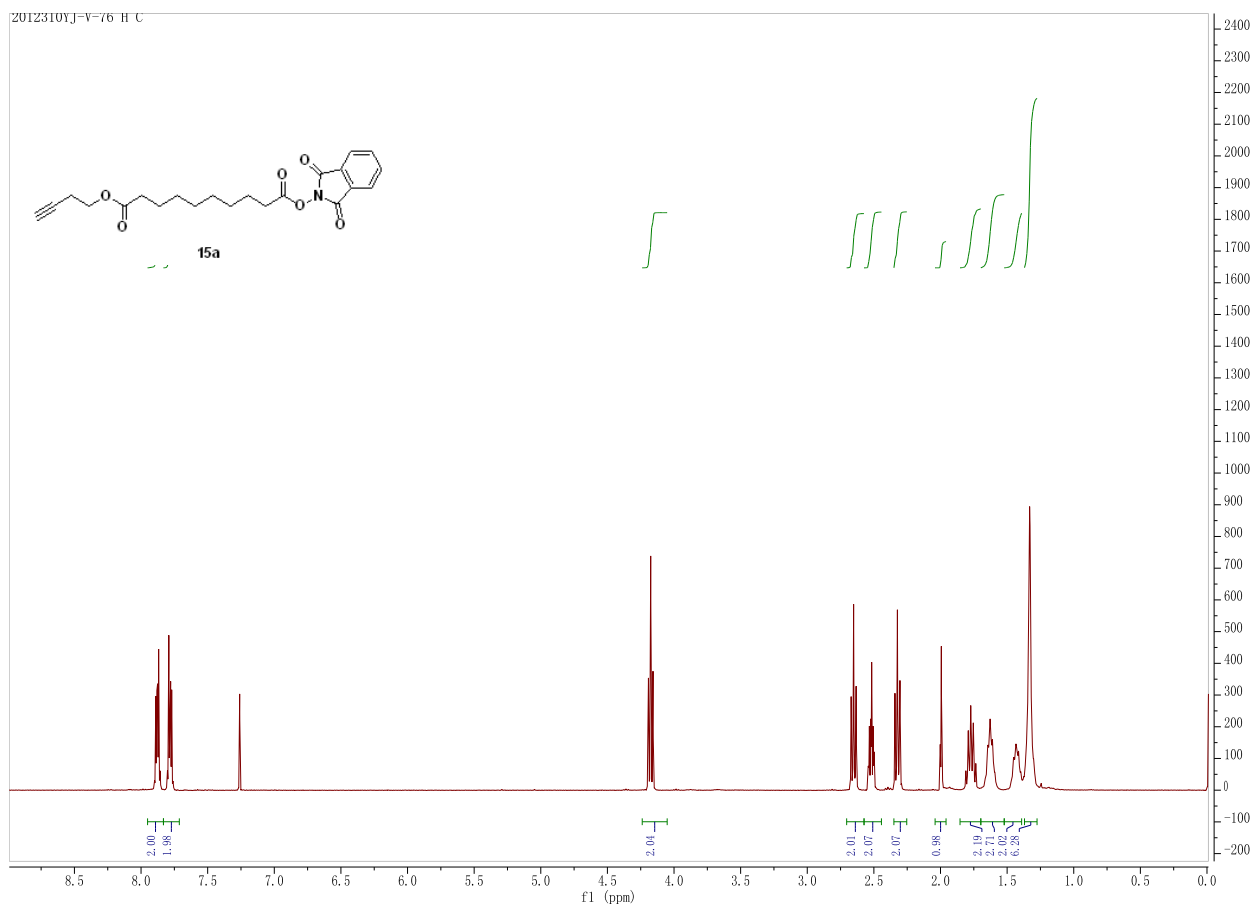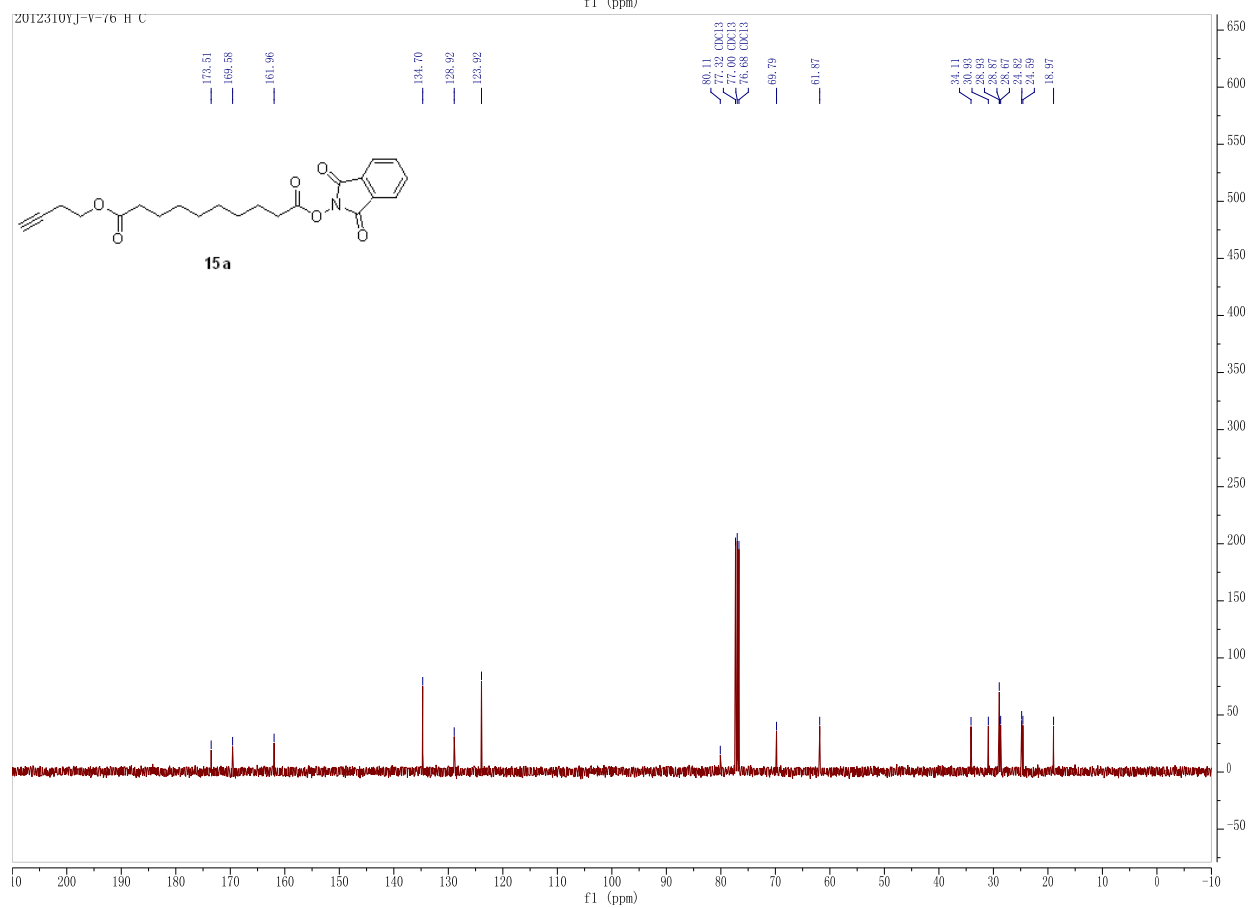

2011177HCC-VI-89-BrF\_PROTON\_01  
Gradient Shimming

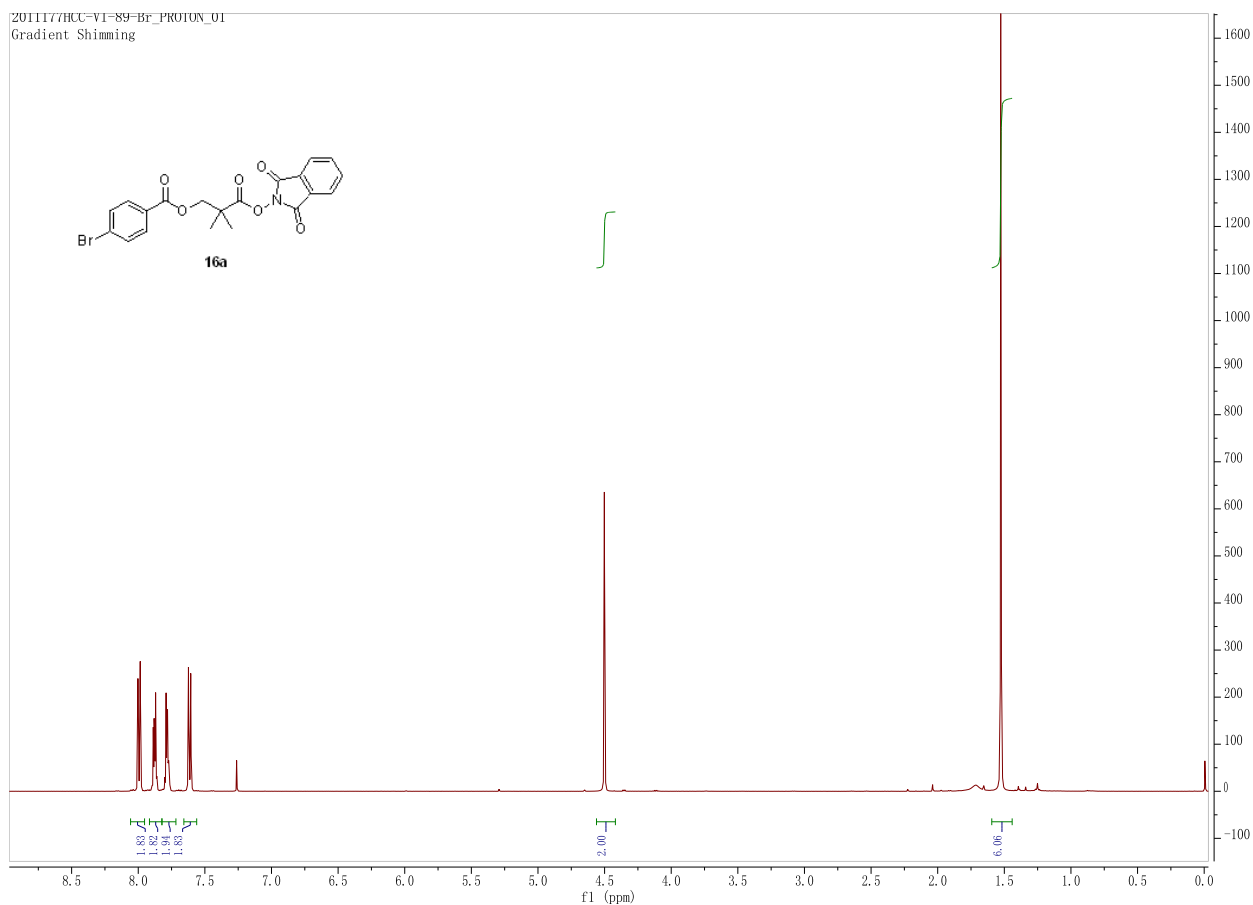

2011177HCC-VI-89-BrF\_CARBON\_01  
2011177HCC-VI-89-Br

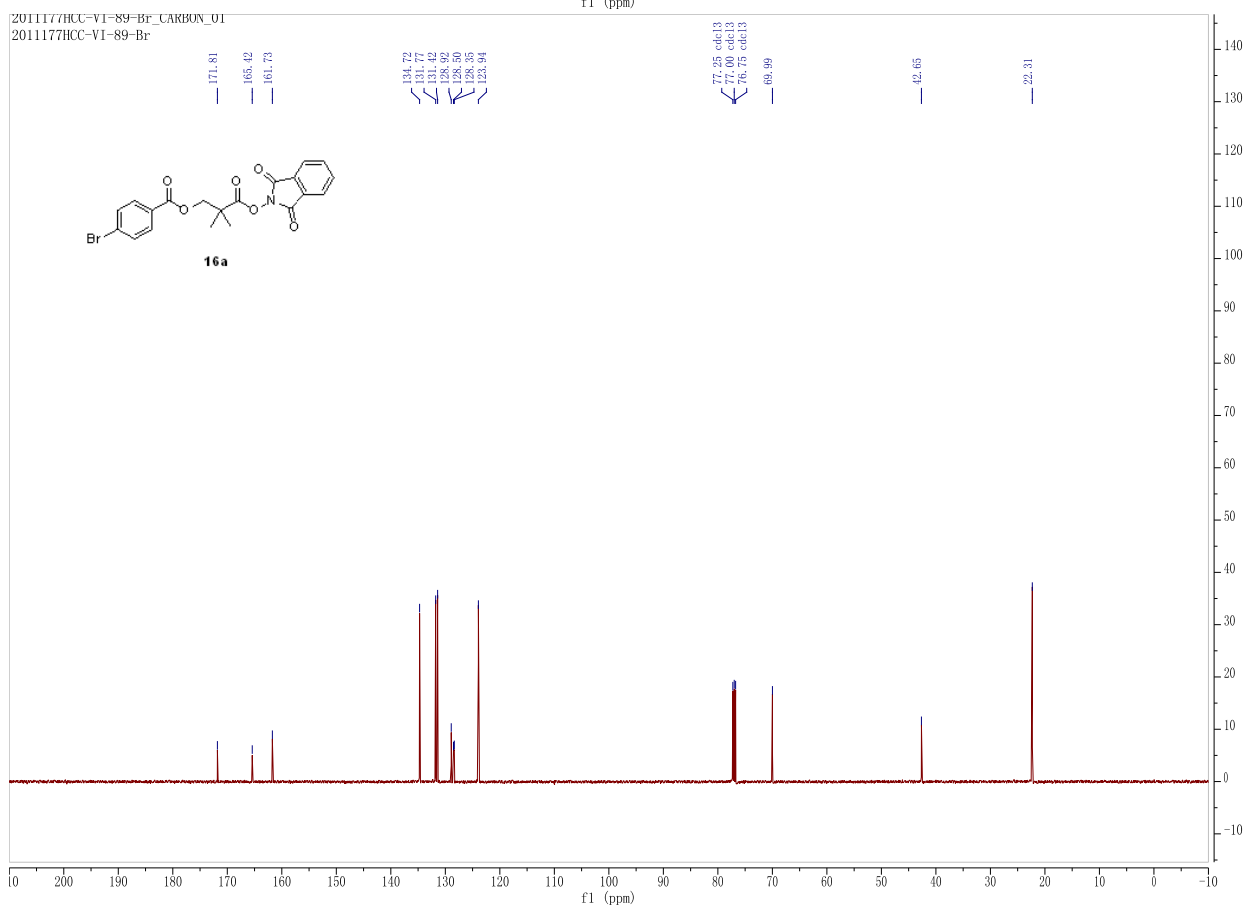

2011177HCC-VI-88-1\_PROTON\_01  
Gradient Shimming

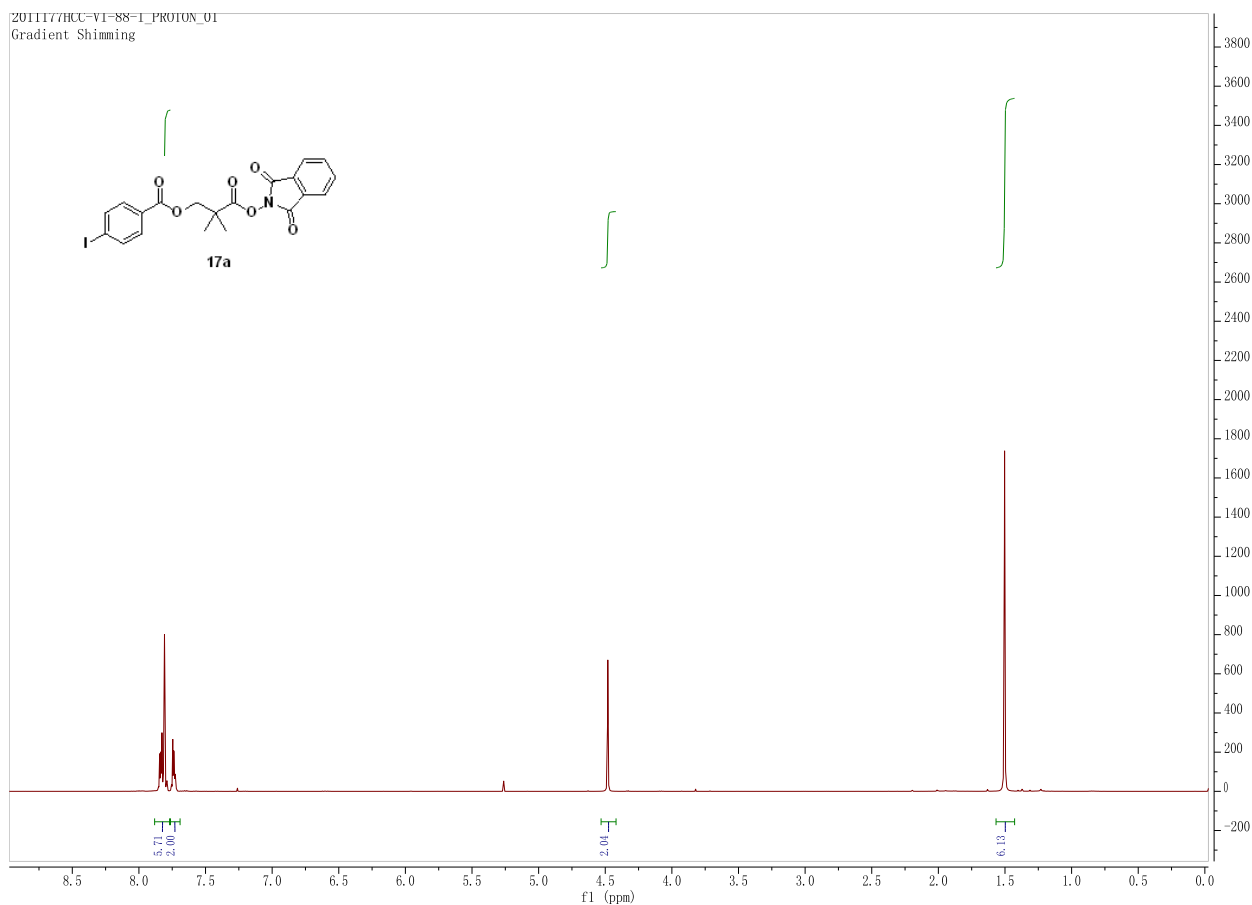

2011177HCC-VI-88-1\_CARBON\_01  
2011177HCC-VI-88-1

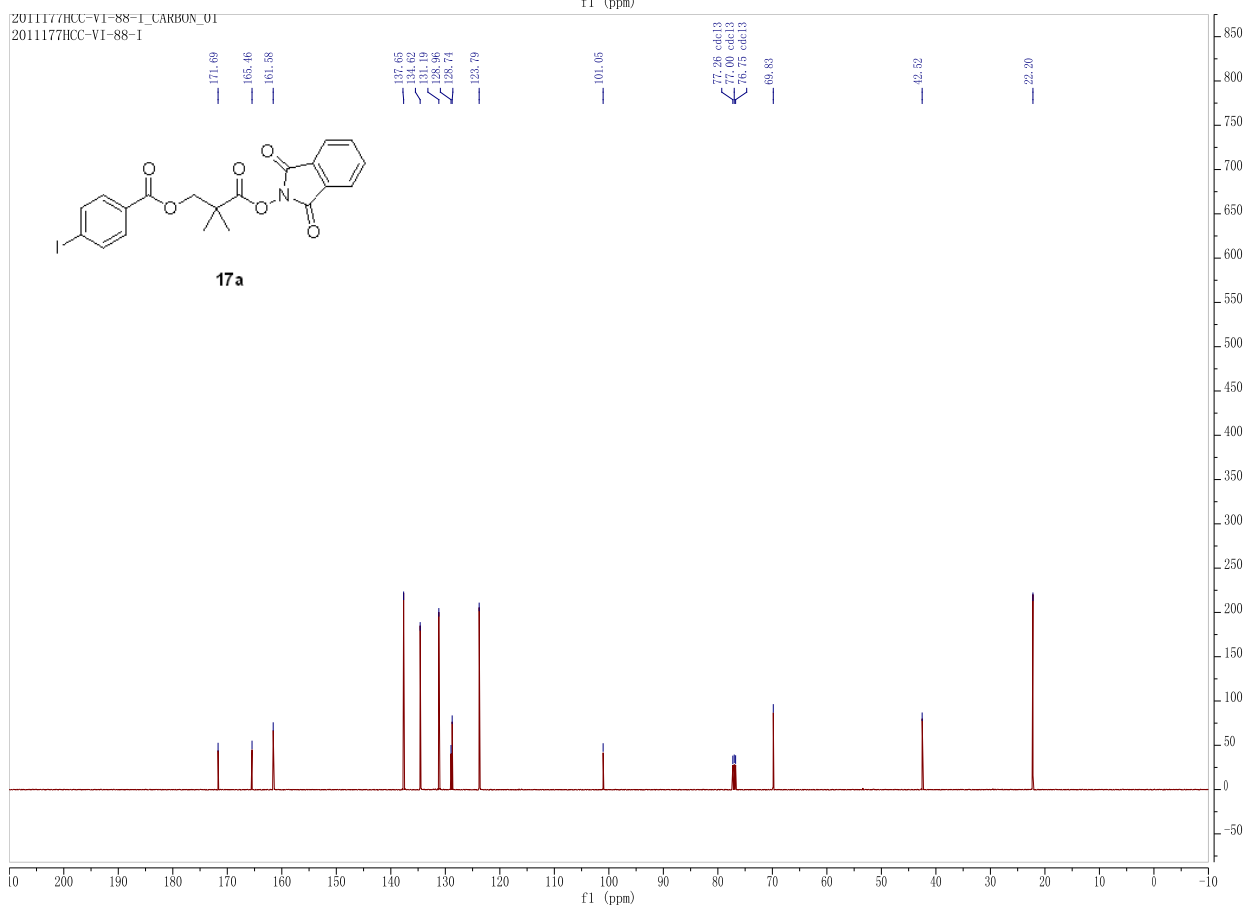



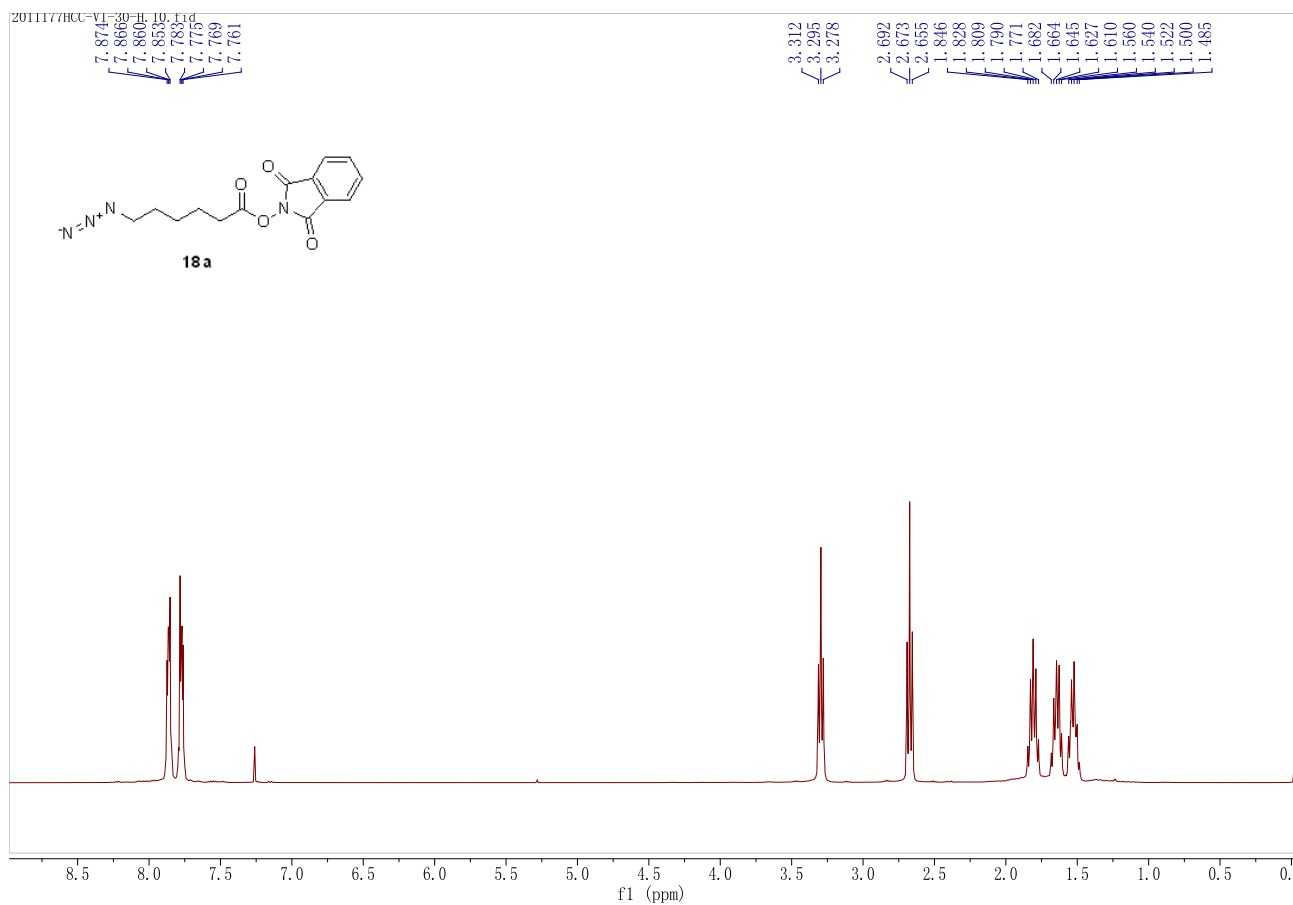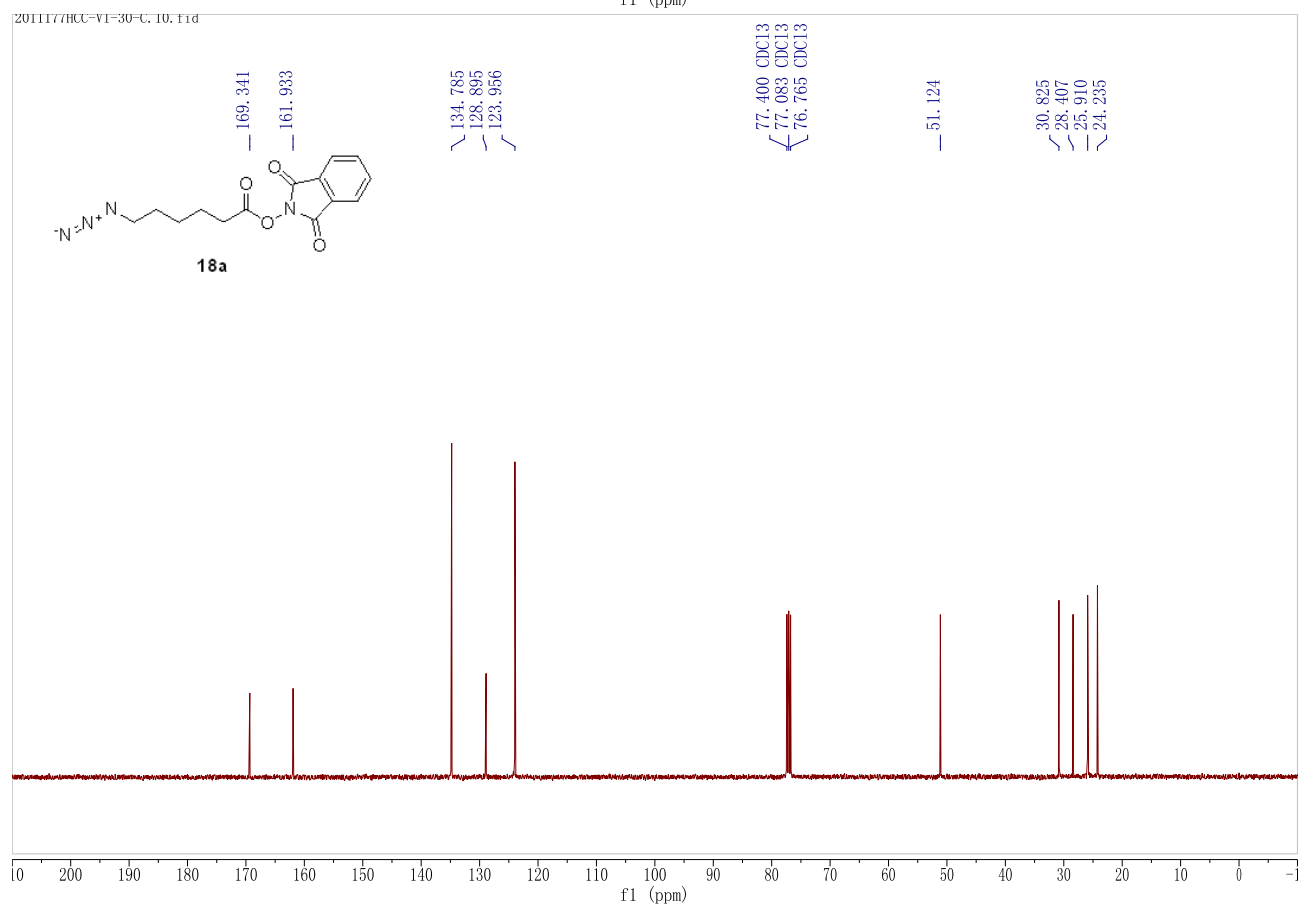

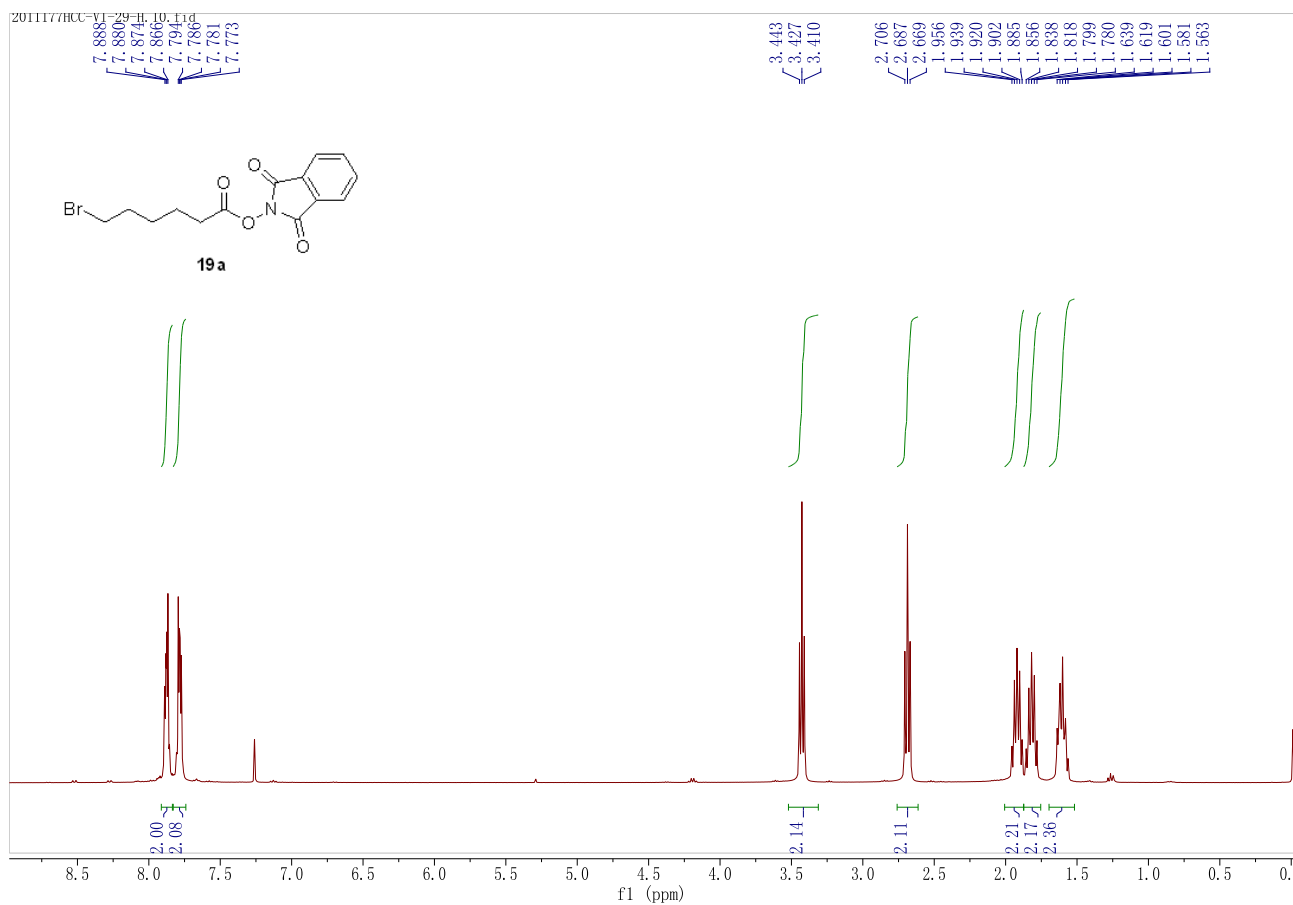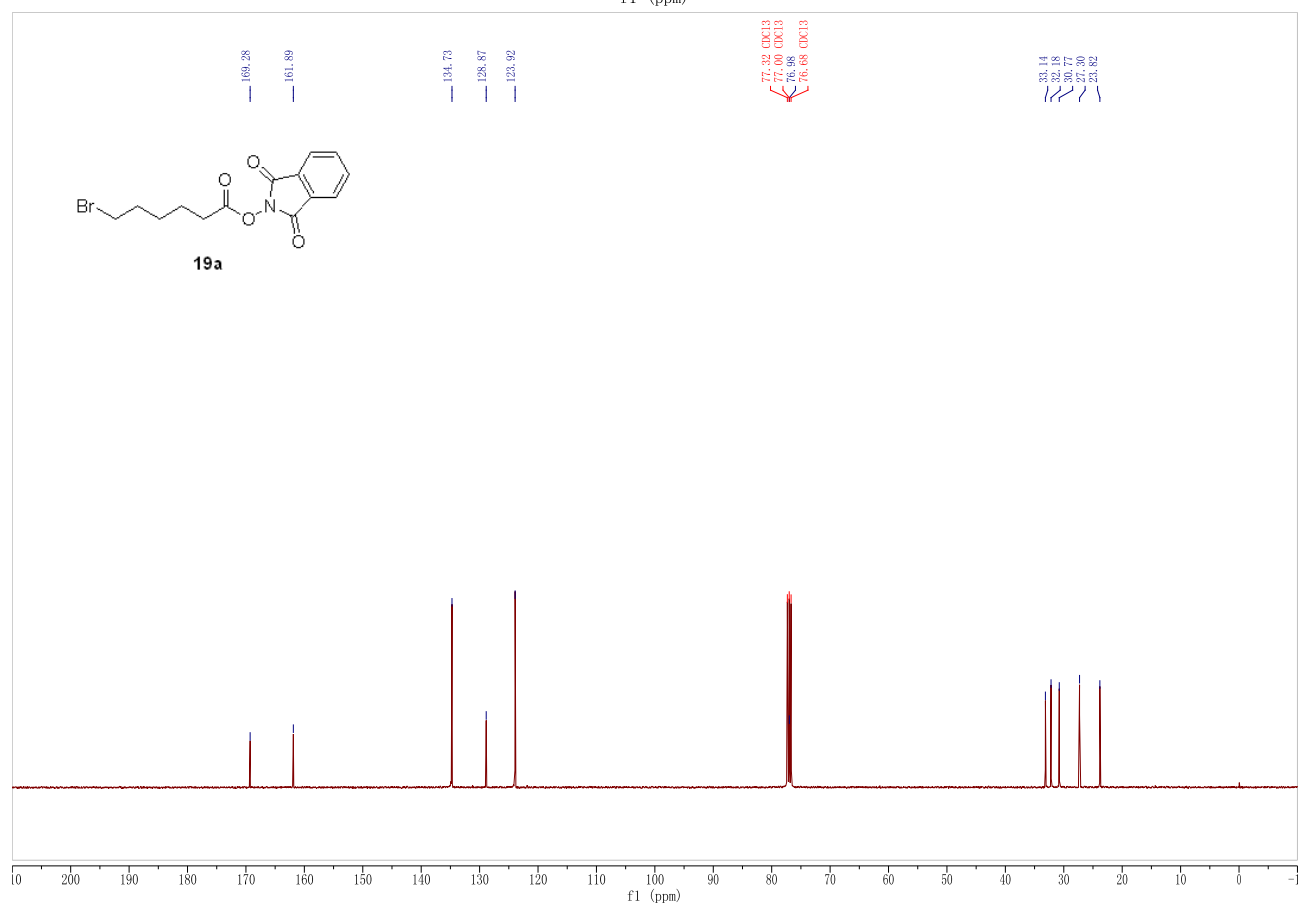

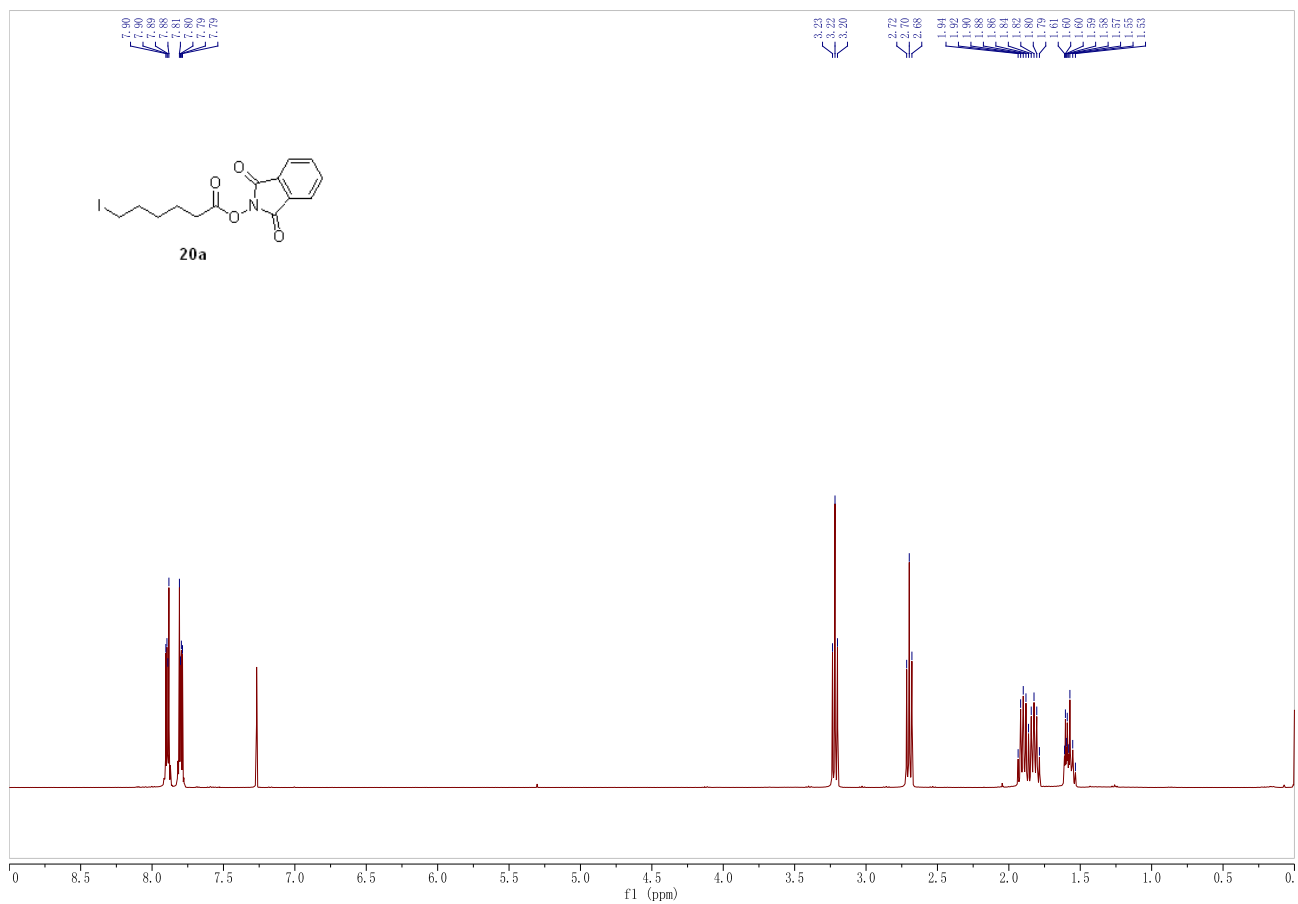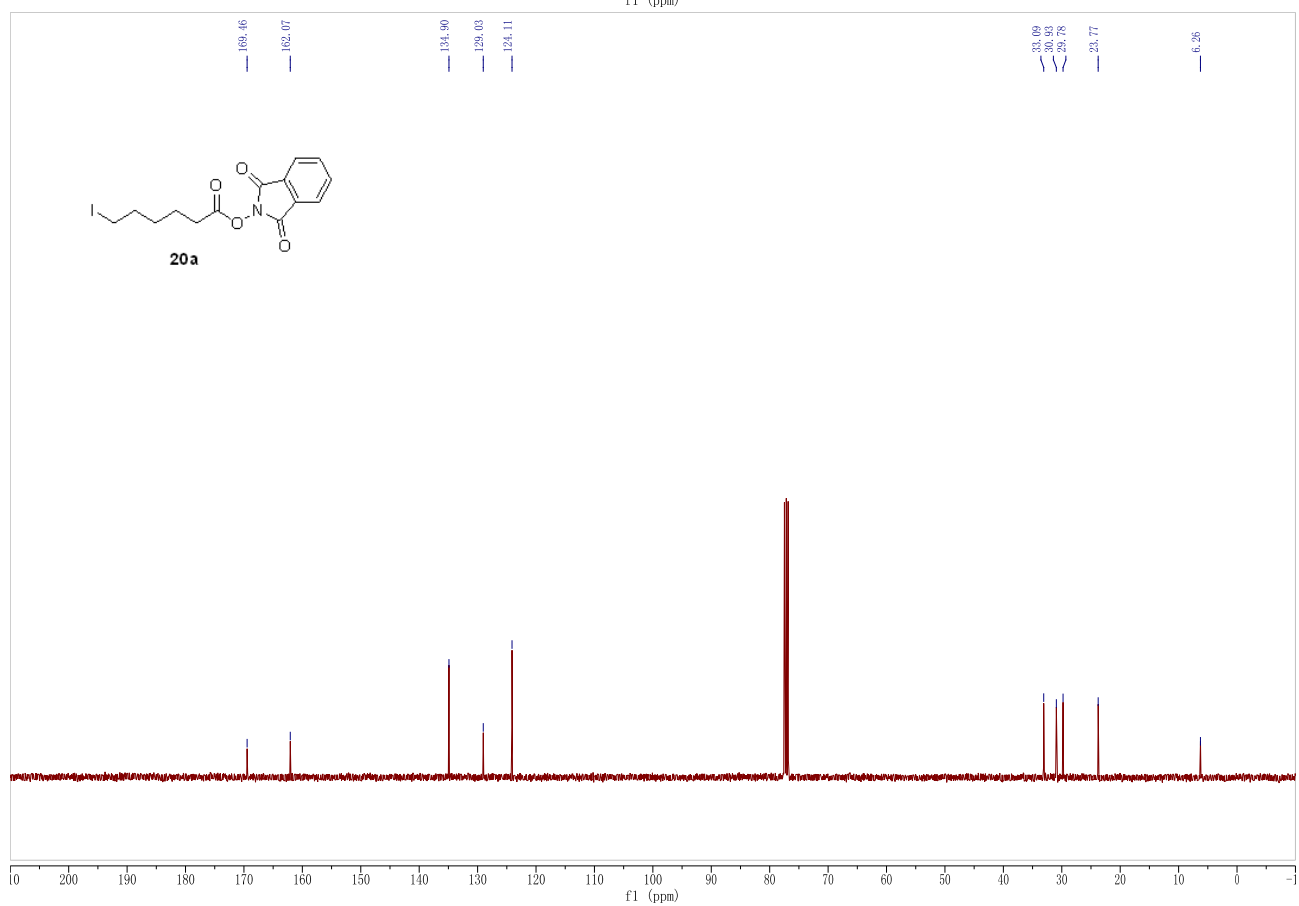

2012310YJ-1X-79-subA, 10, f1d

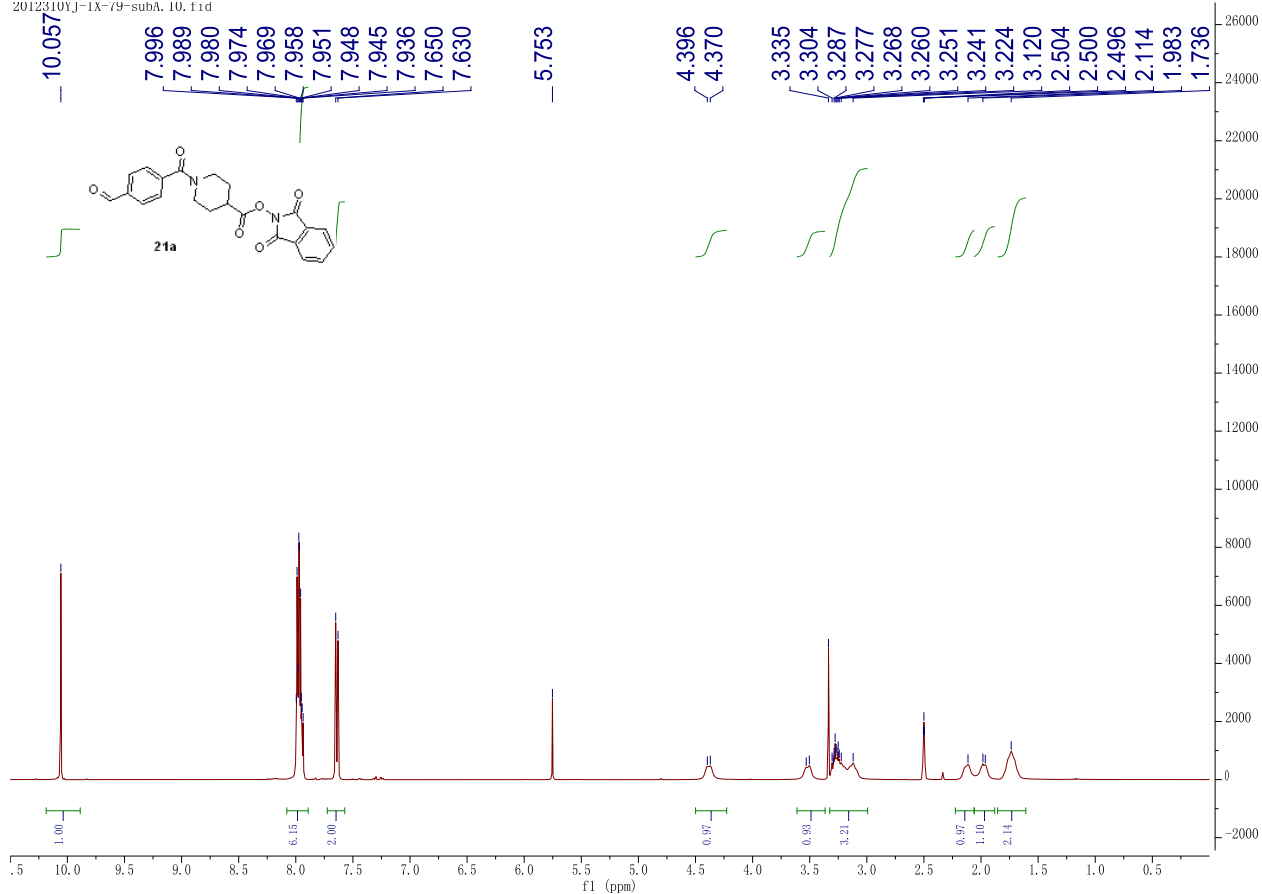

2012310YJ-1X-79-subA, 11, f1d

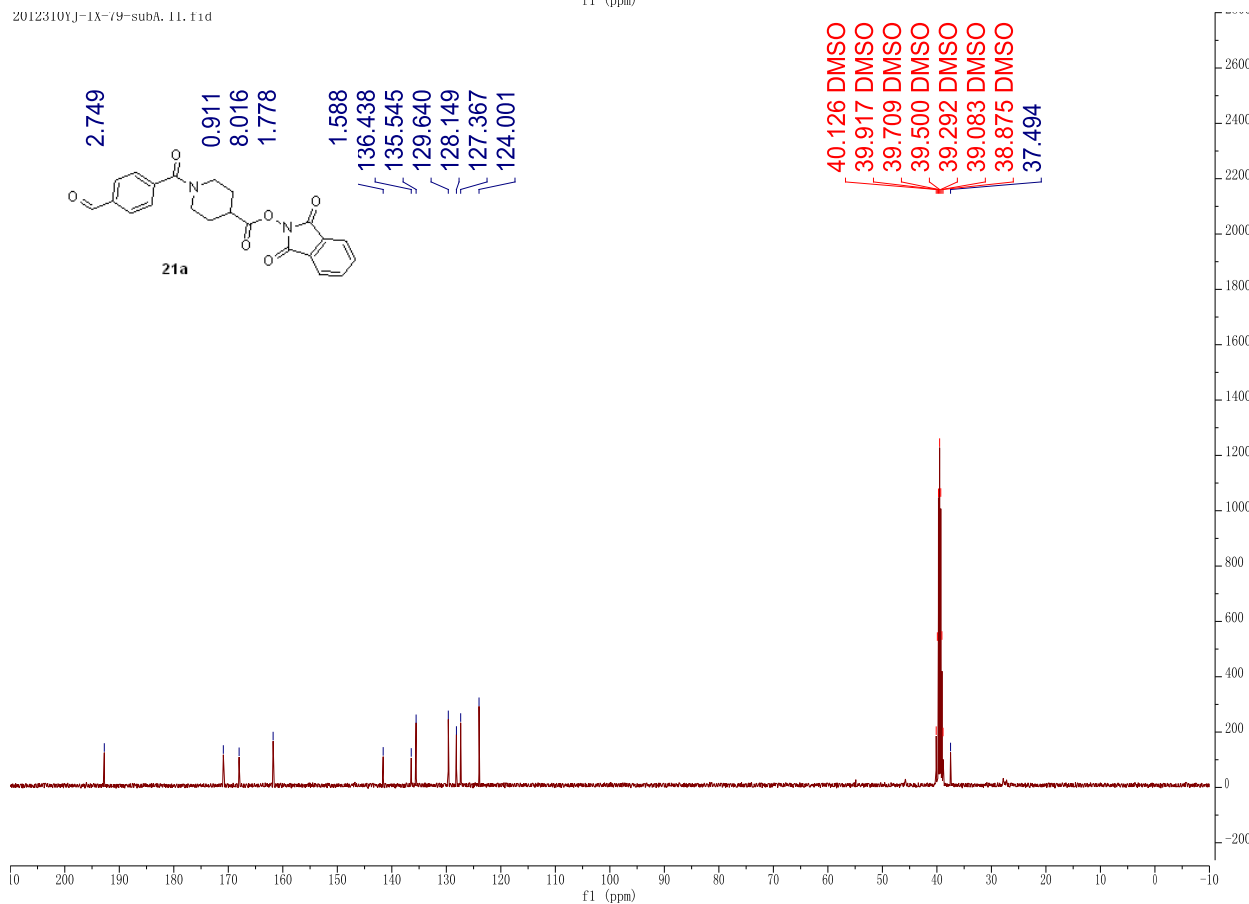

2012310ZJ-1-21

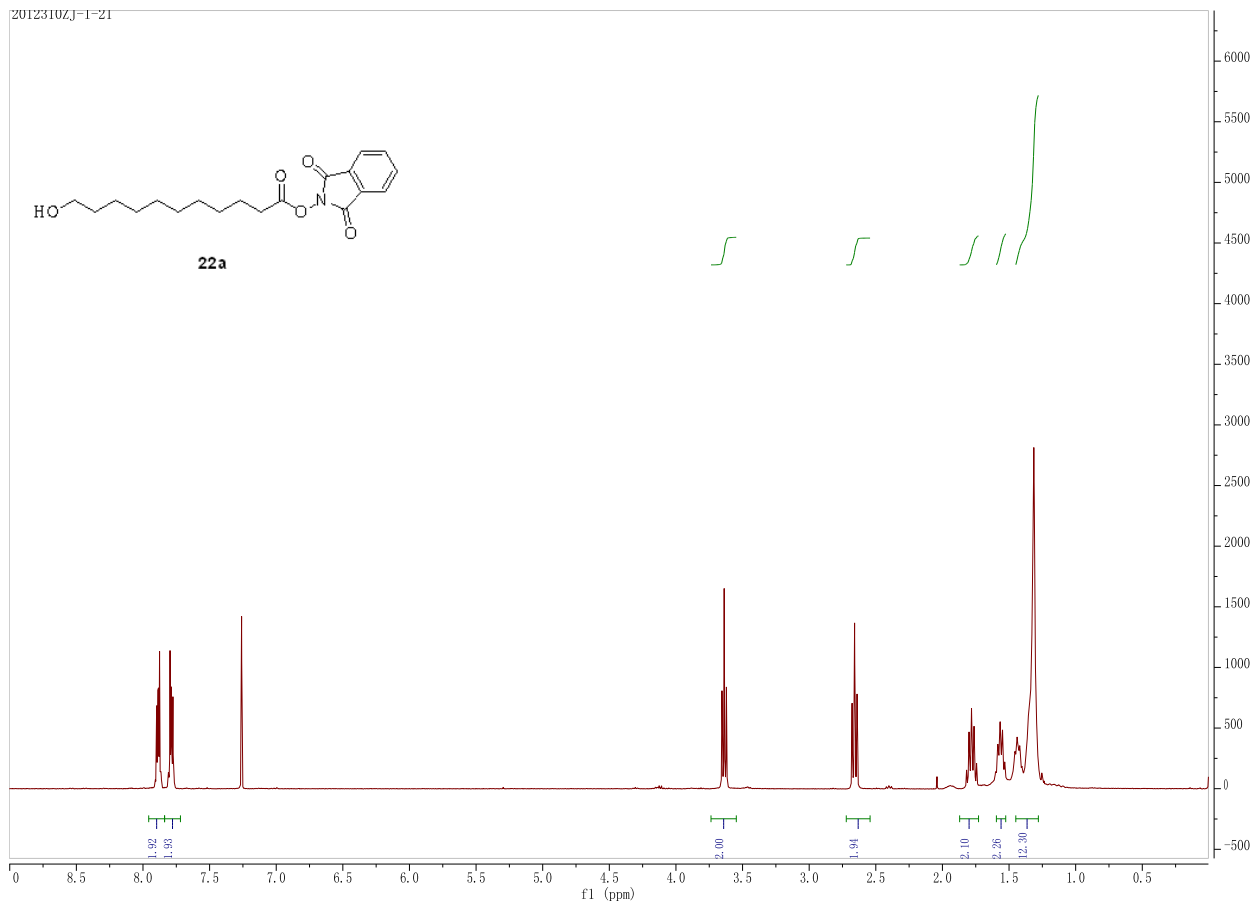

2012158ZJ-1-21-Z

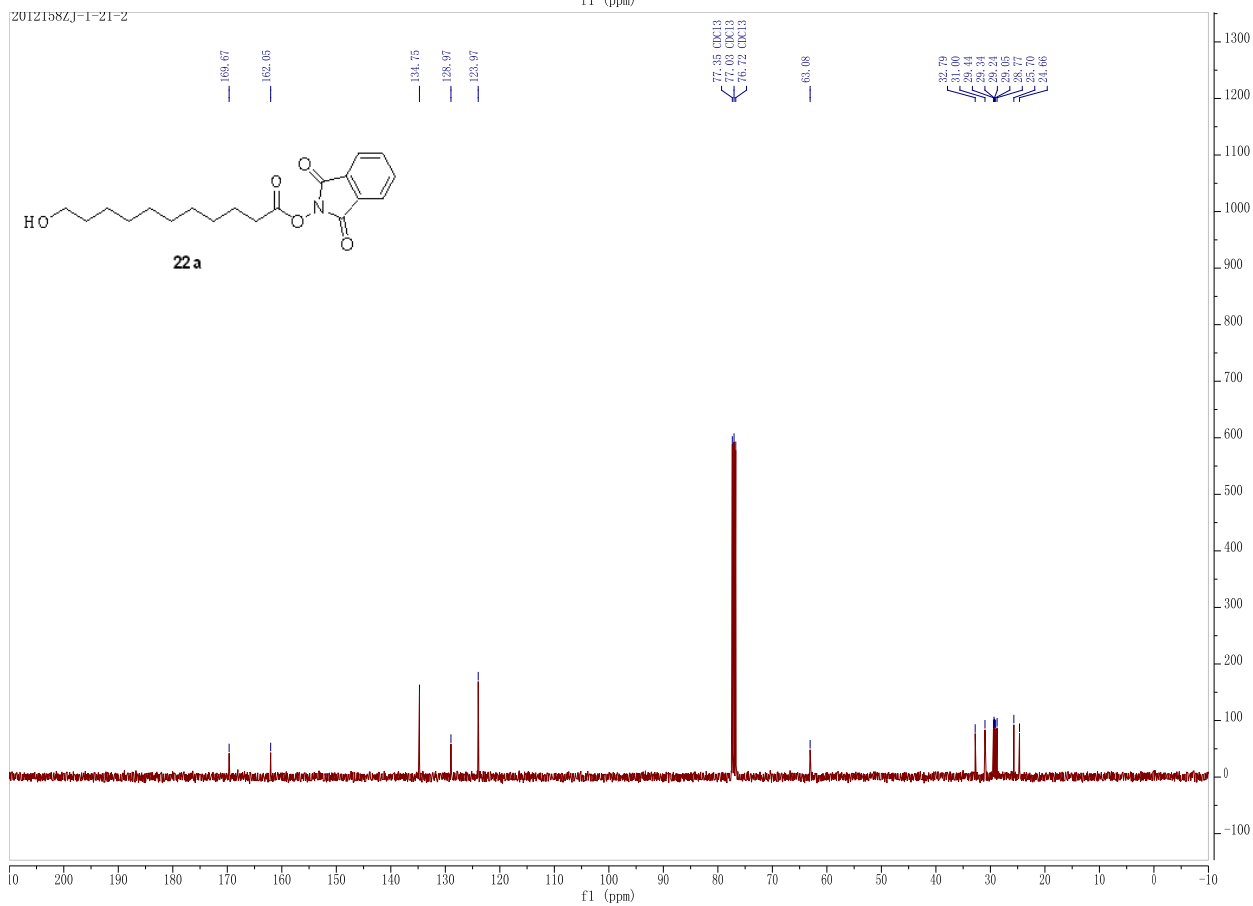

2012158ZJ-1-56\_PROTON\_01  
Gradient Shimming

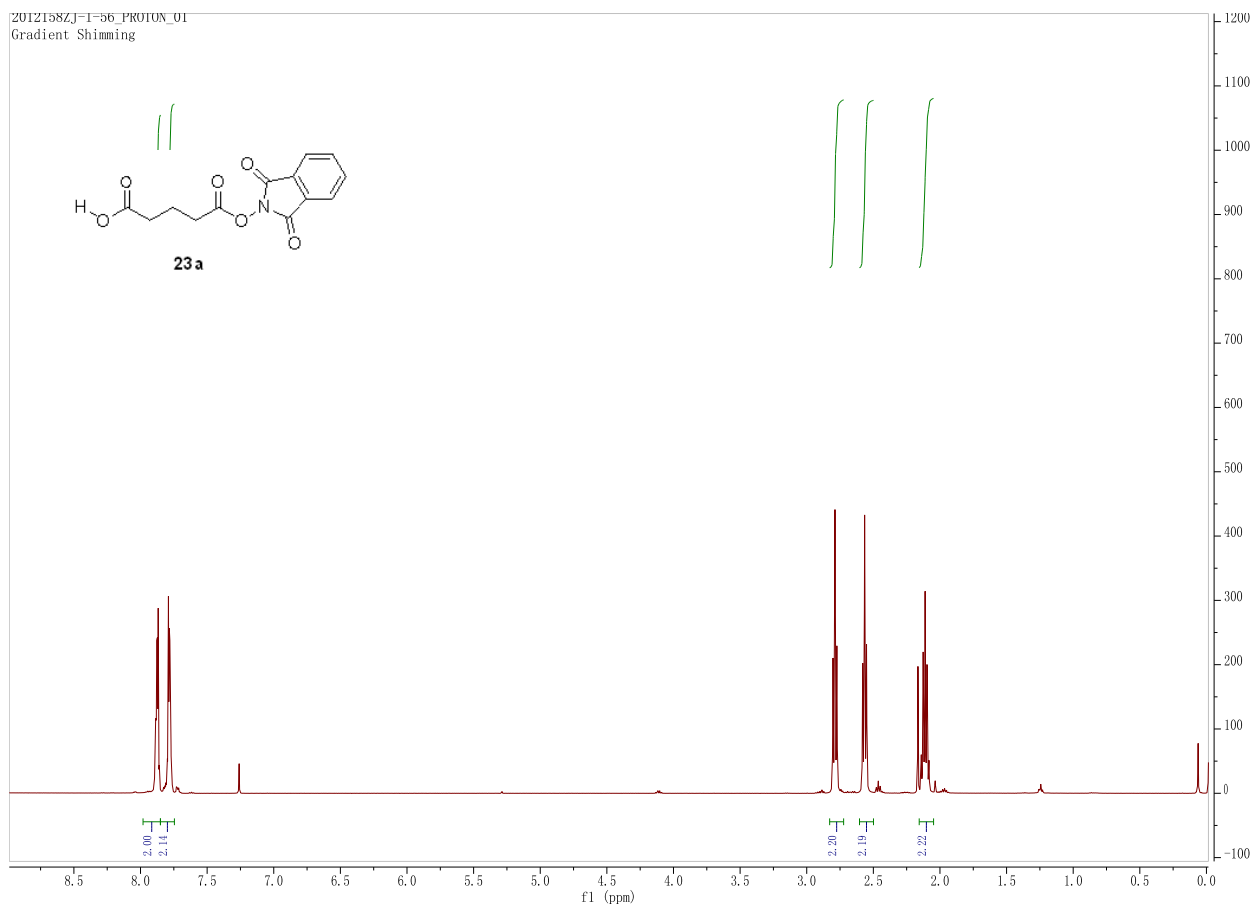

2012158ZJ-1-56\_CARBON\_01  
2012158ZJ-1-56

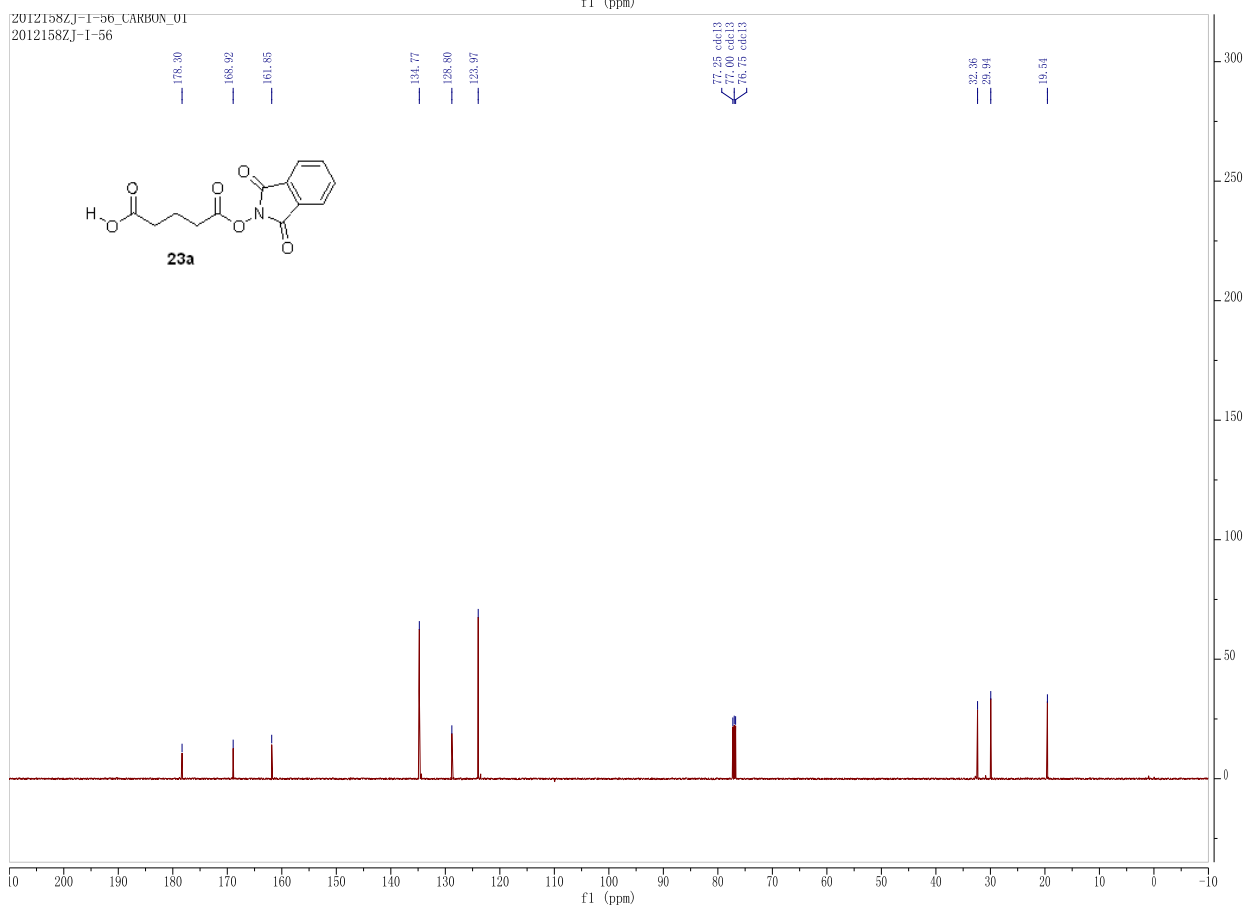

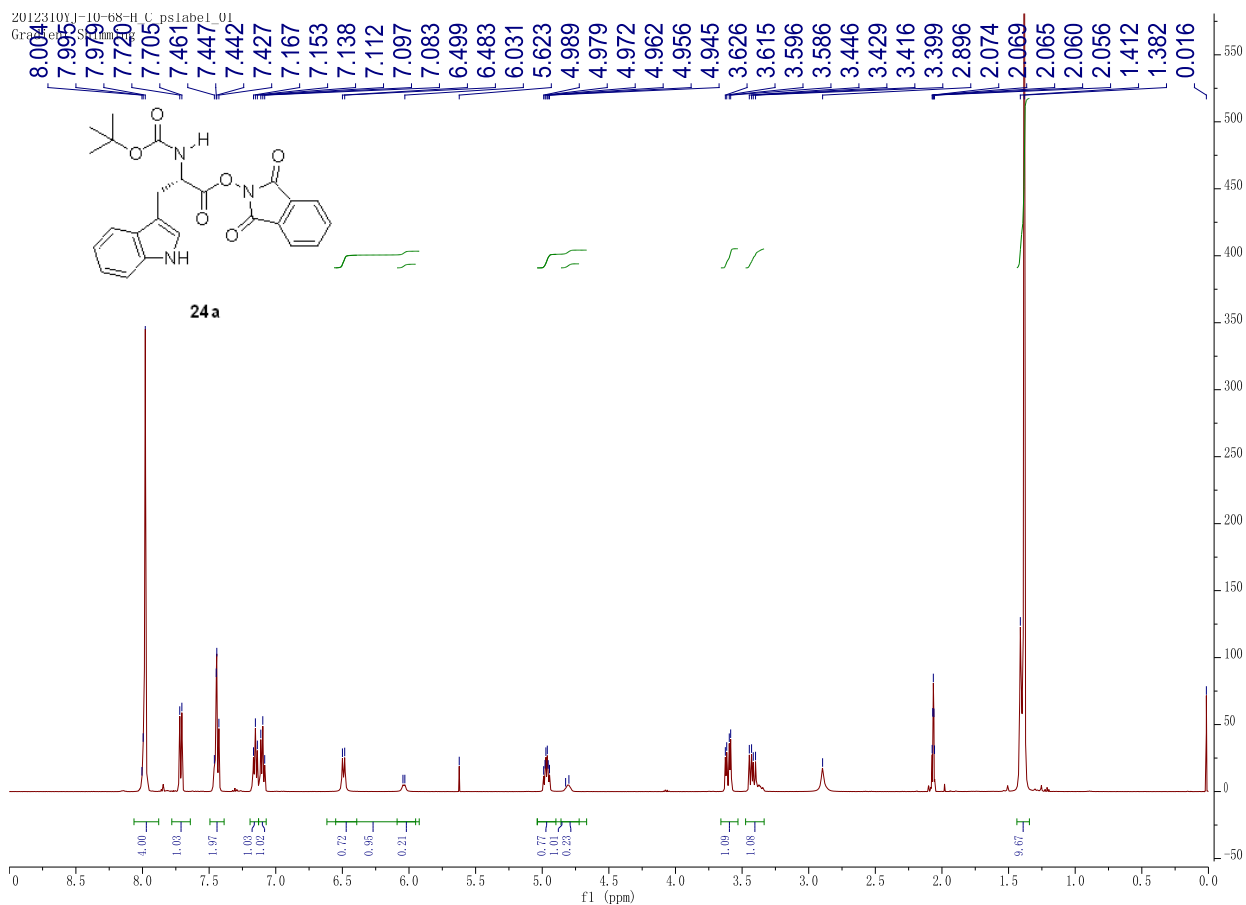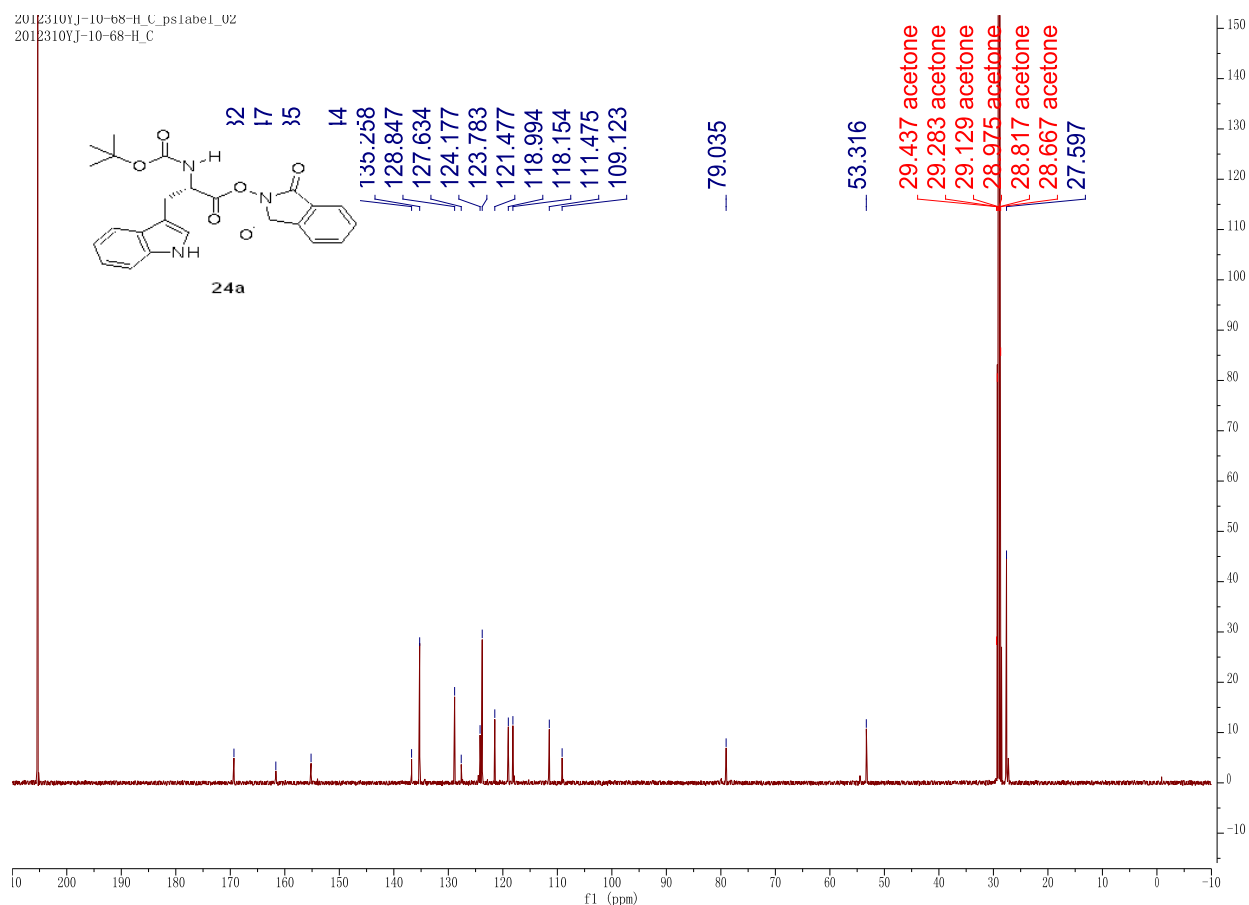

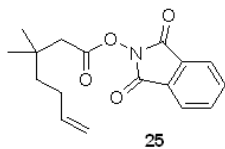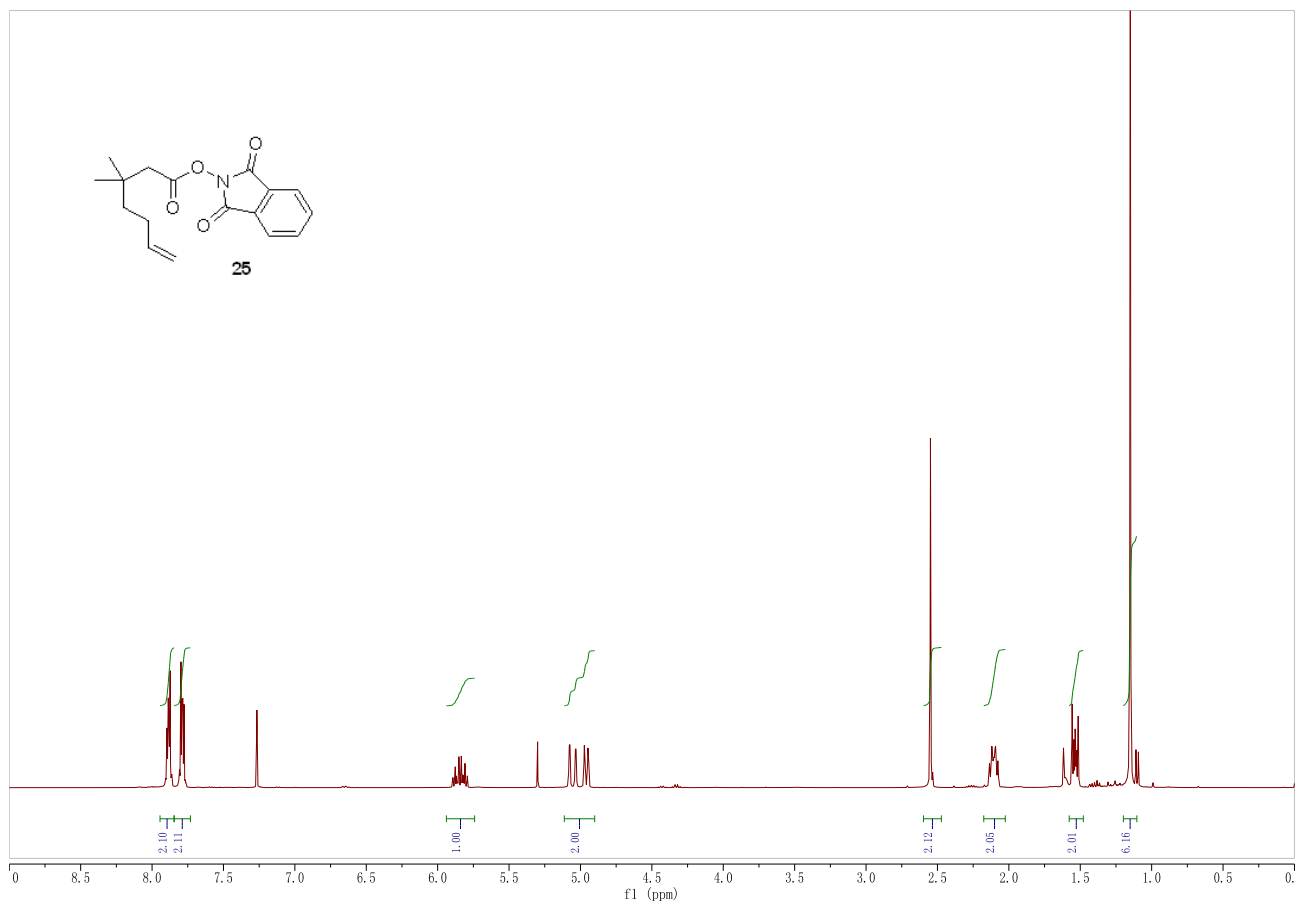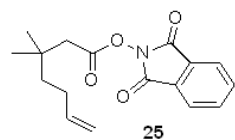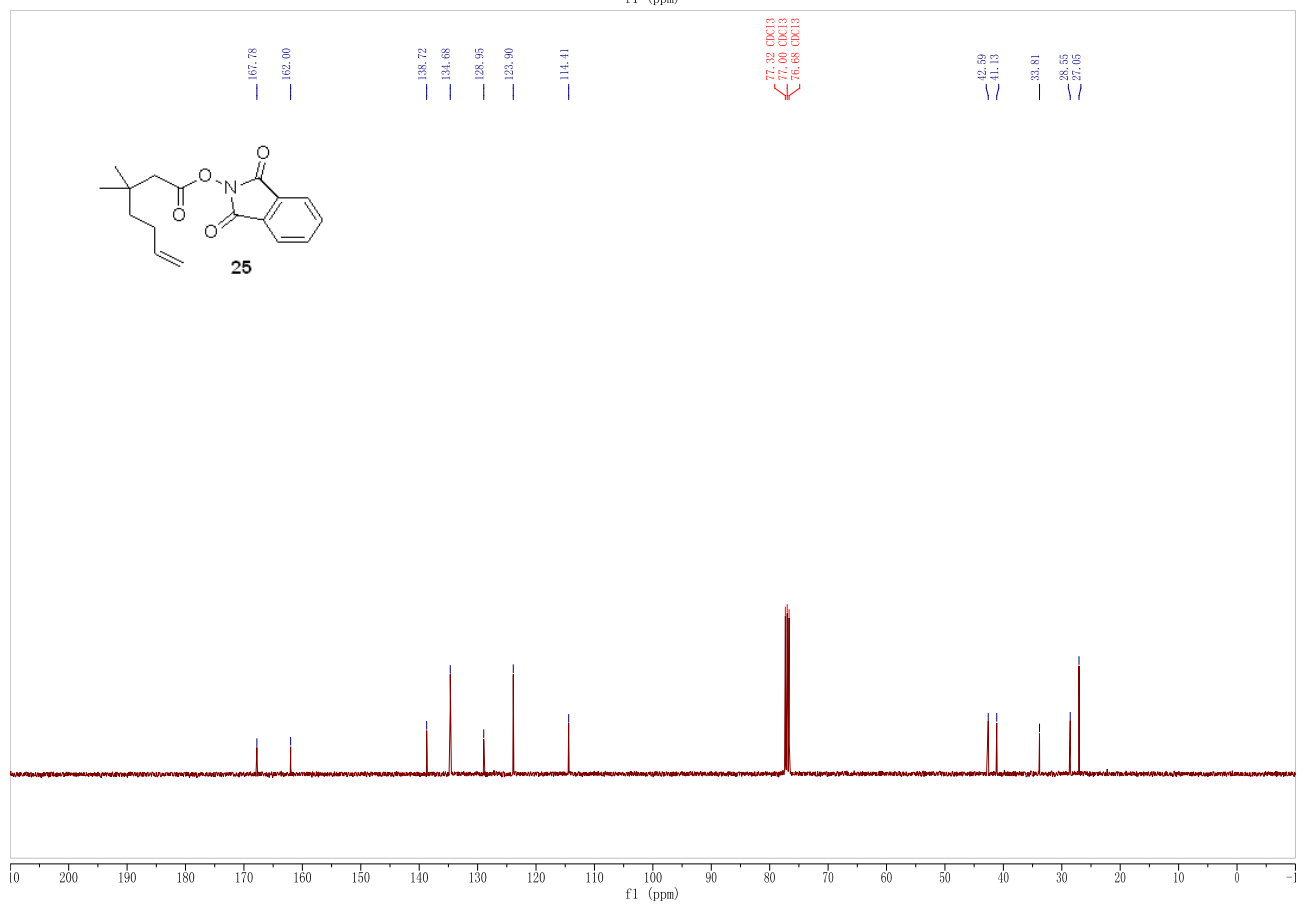



2012310QL-1-3 H C, 10, f1d

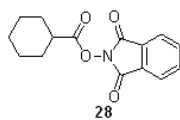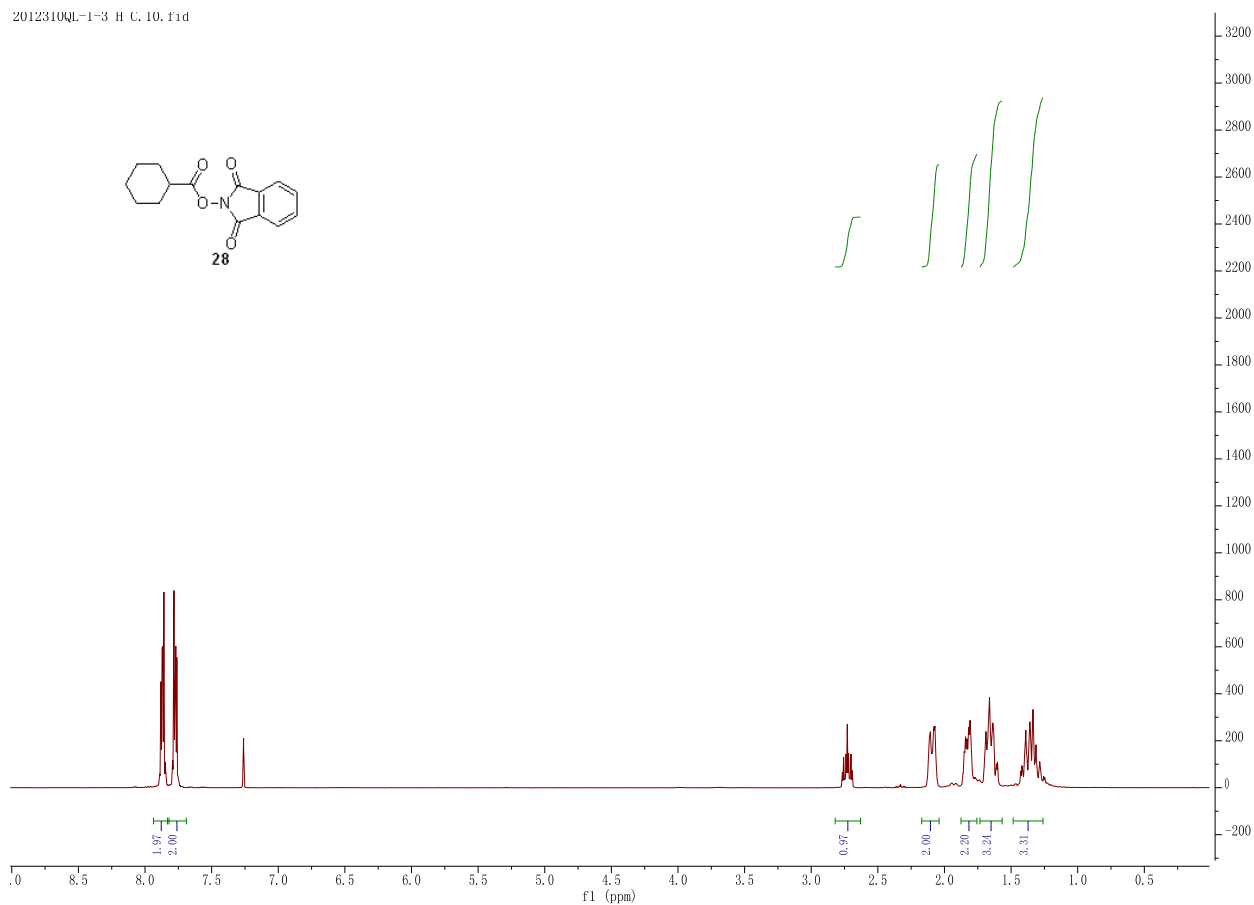

2012310QL-1-3 H C, 11, f1d

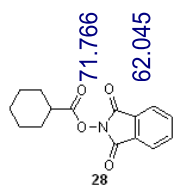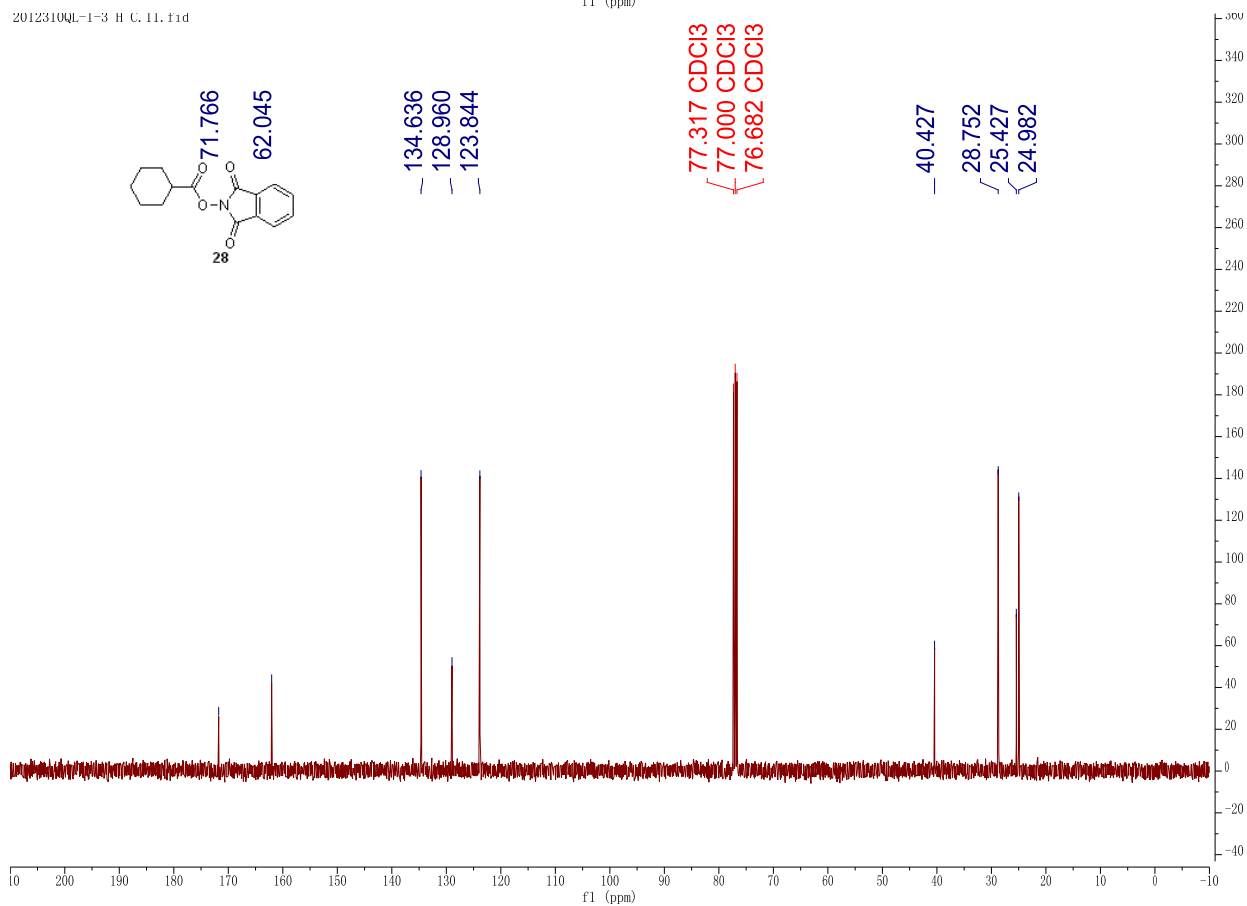

ZJ-II-49-CO

7.903  
7.895  
7.889  
7.882  
7.810  
7.802  
7.796  
7.788  
7.268

4.244  
4.227  
4.211  
2.813  
2.795  
2.777  
2.578  
2.571  
2.561  
2.557  
2.555  
2.544  
2.538  
2.520  
2.199  
2.141  
2.123  
2.105  
2.087  
2.054  
2.048  
2.041

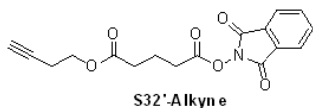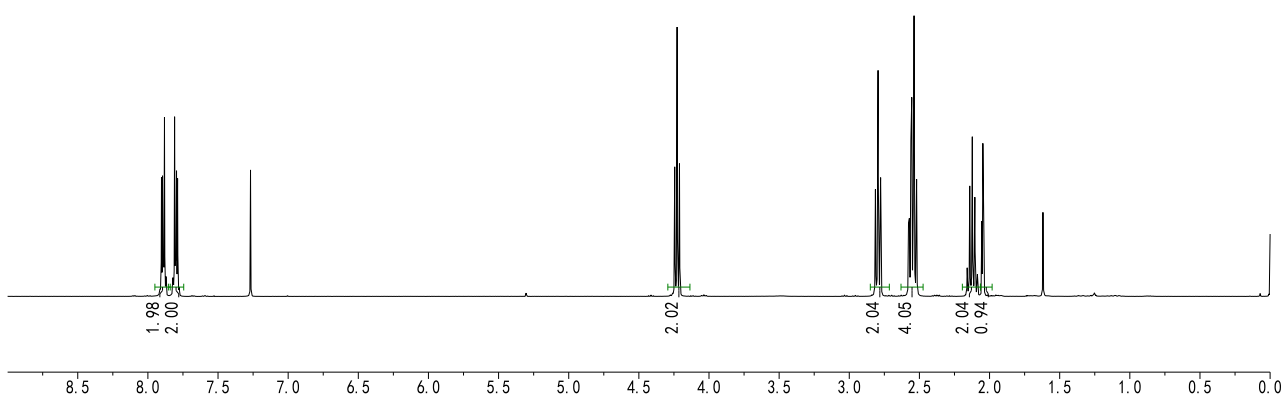

2012310ZJ-II-49-H\_C.pslabel\_02  
2012310ZJ-II-49-H\_C

172.130  
168.991  
161.806

134.789  
128.798  
123.925

79.986  
77.314  
77.056  
76.804  
70.128  
62.161

32.556  
29.969  
19.800  
18.926

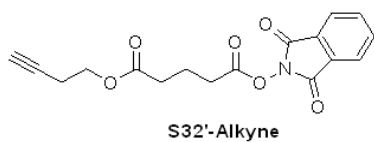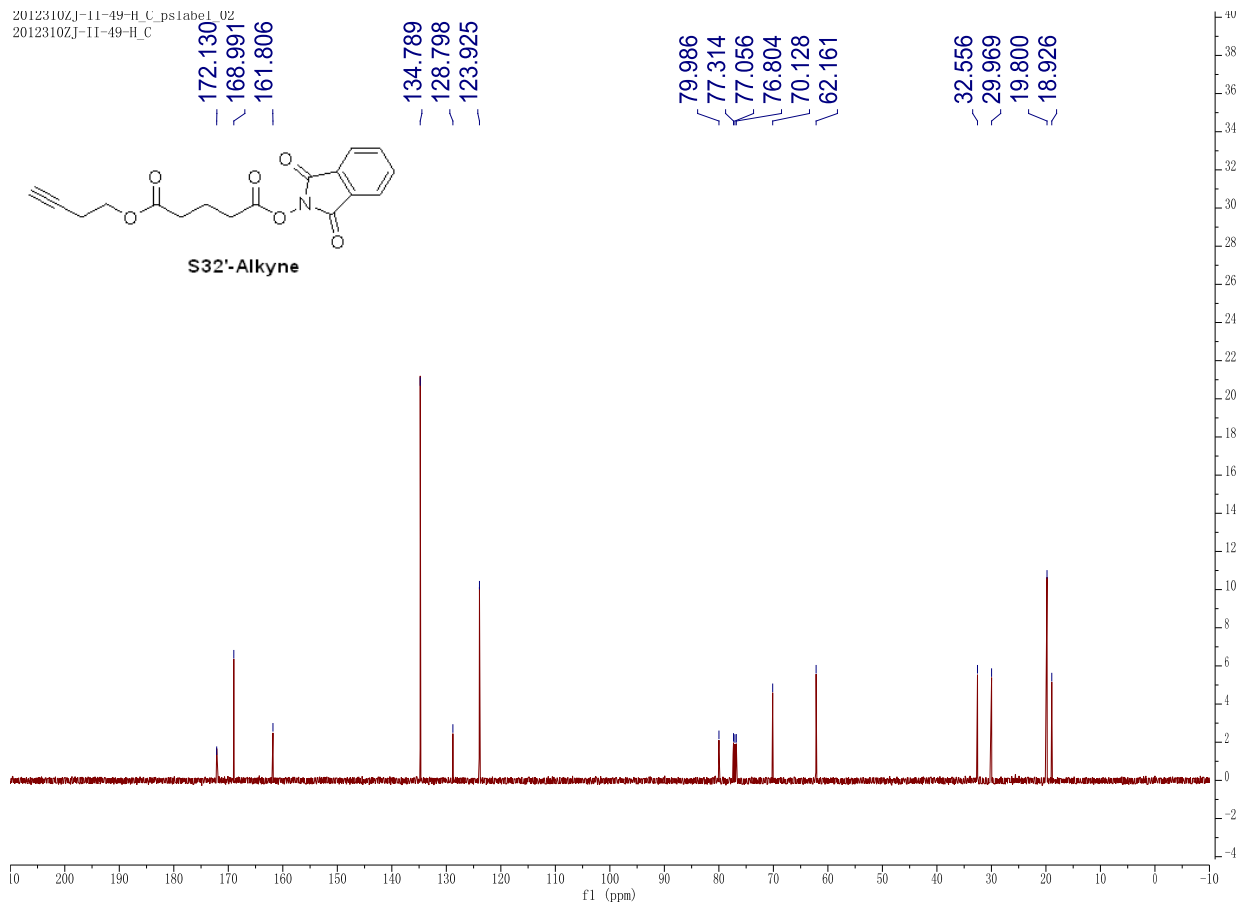

20123108 1-13-22-H-CO\_10.f1d

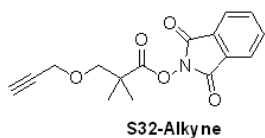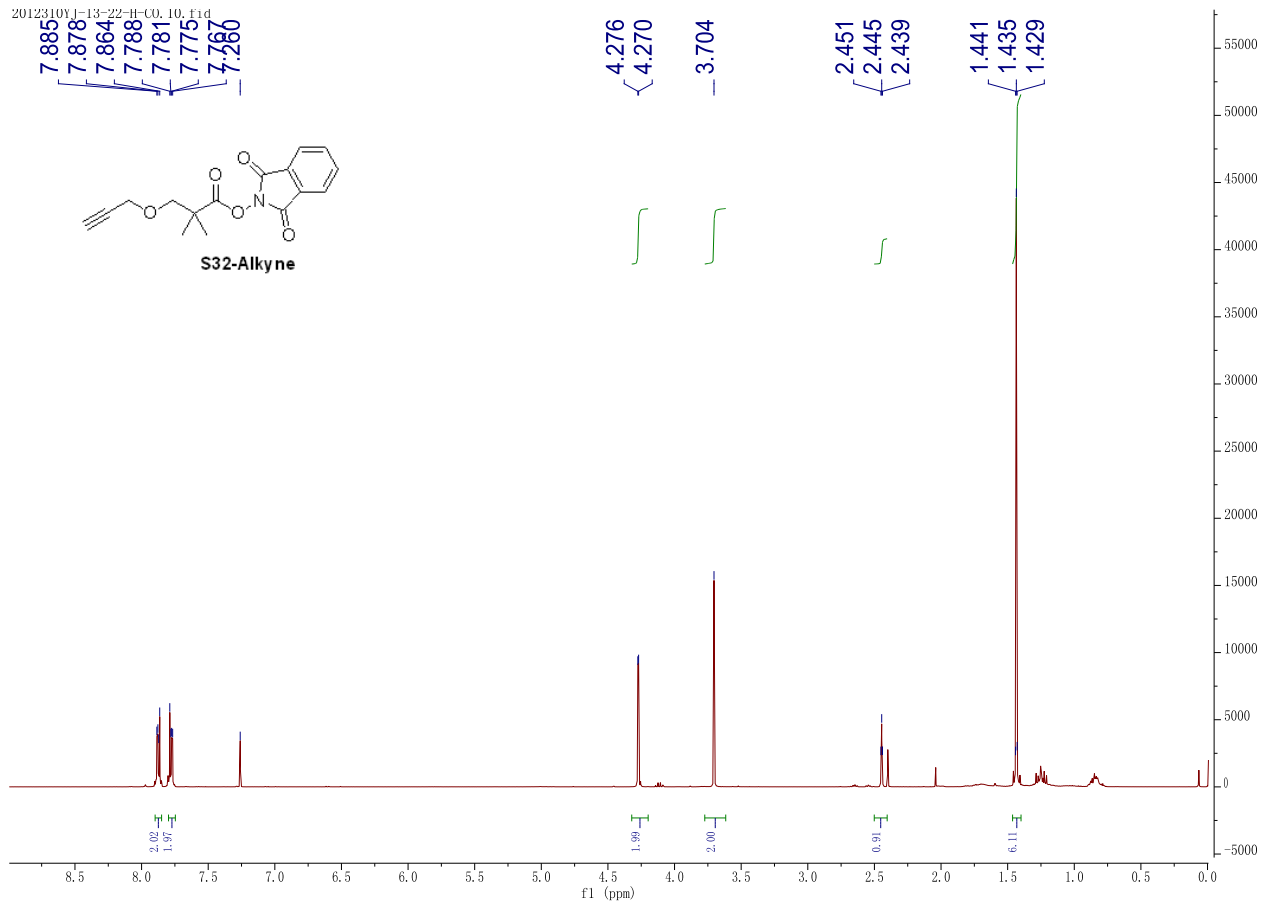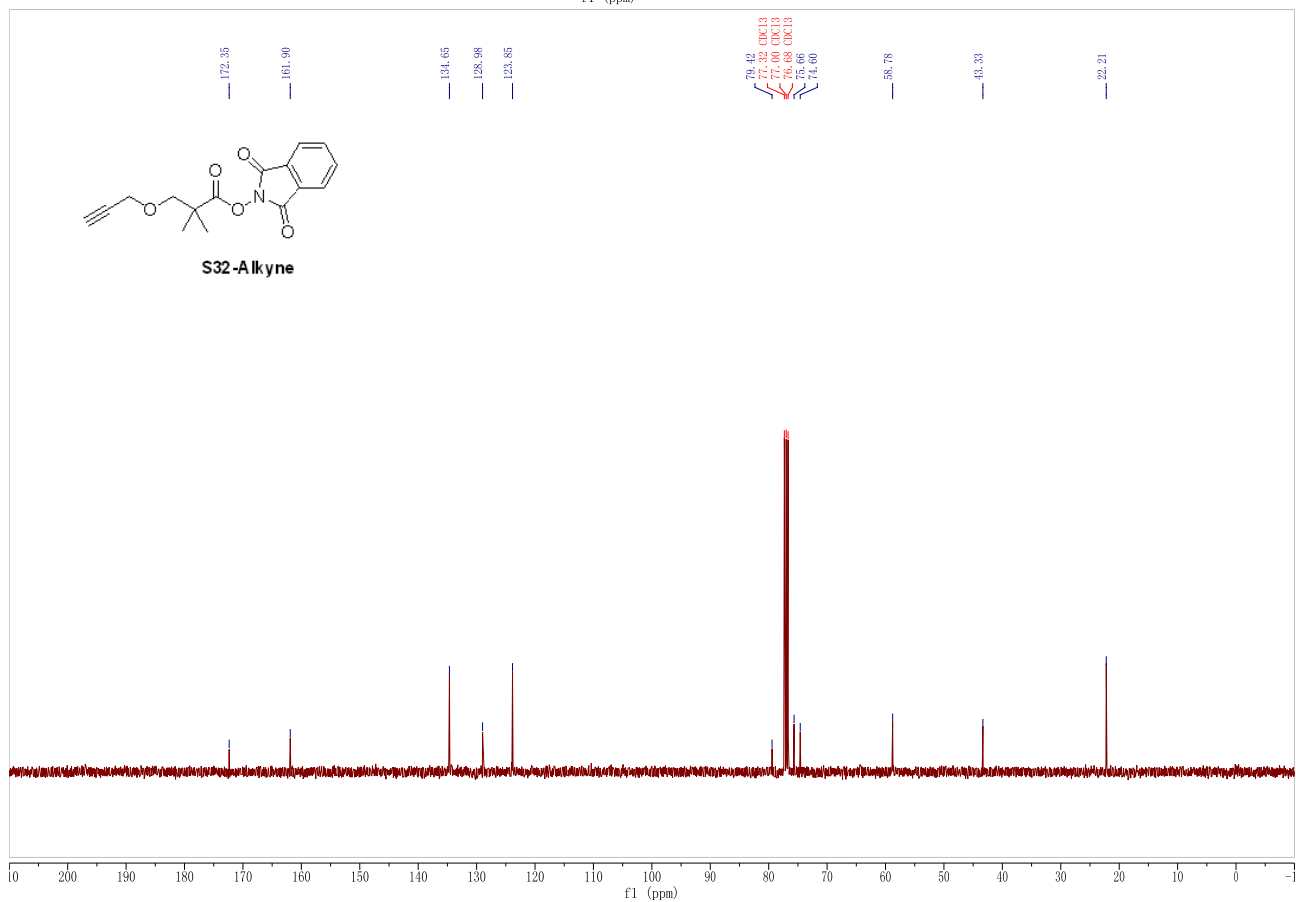

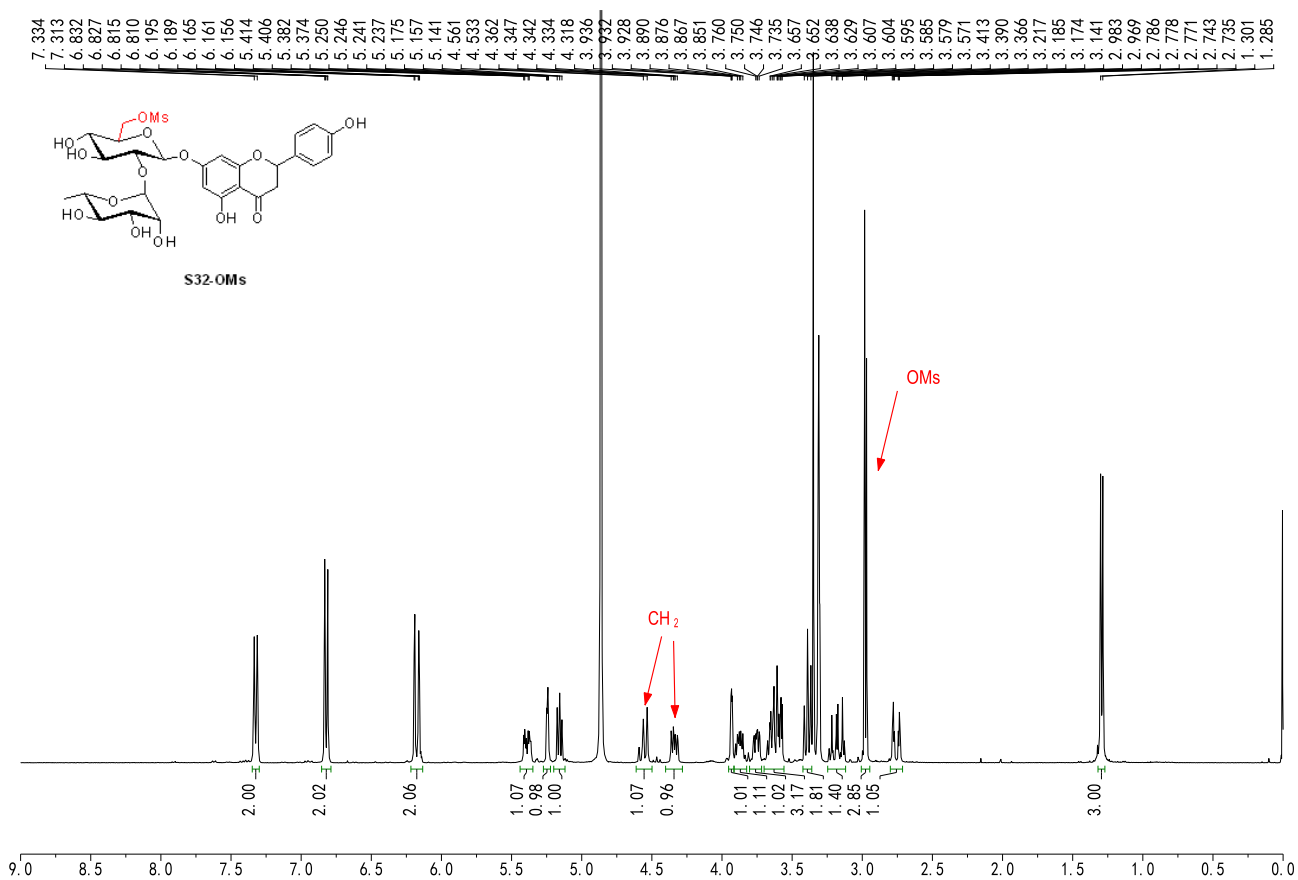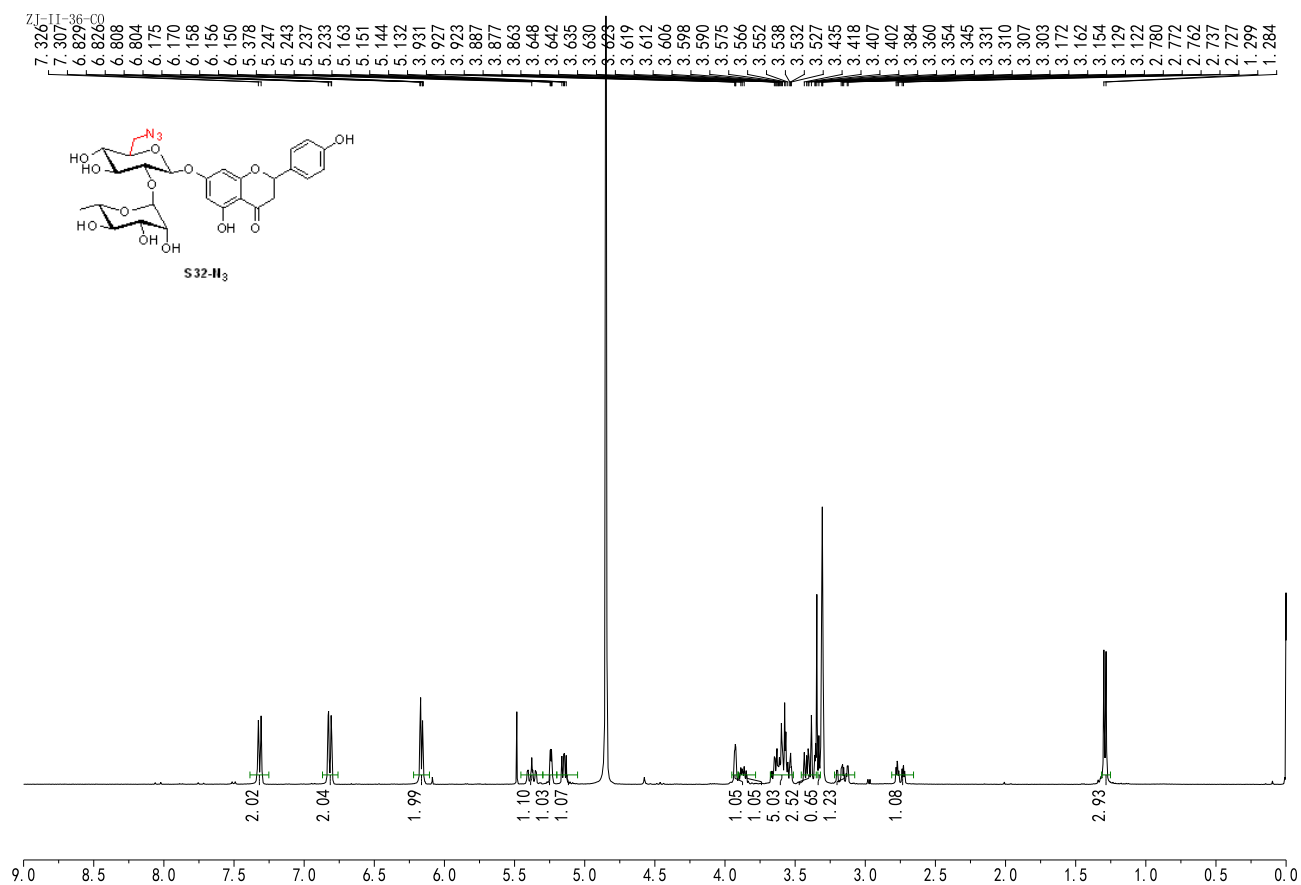

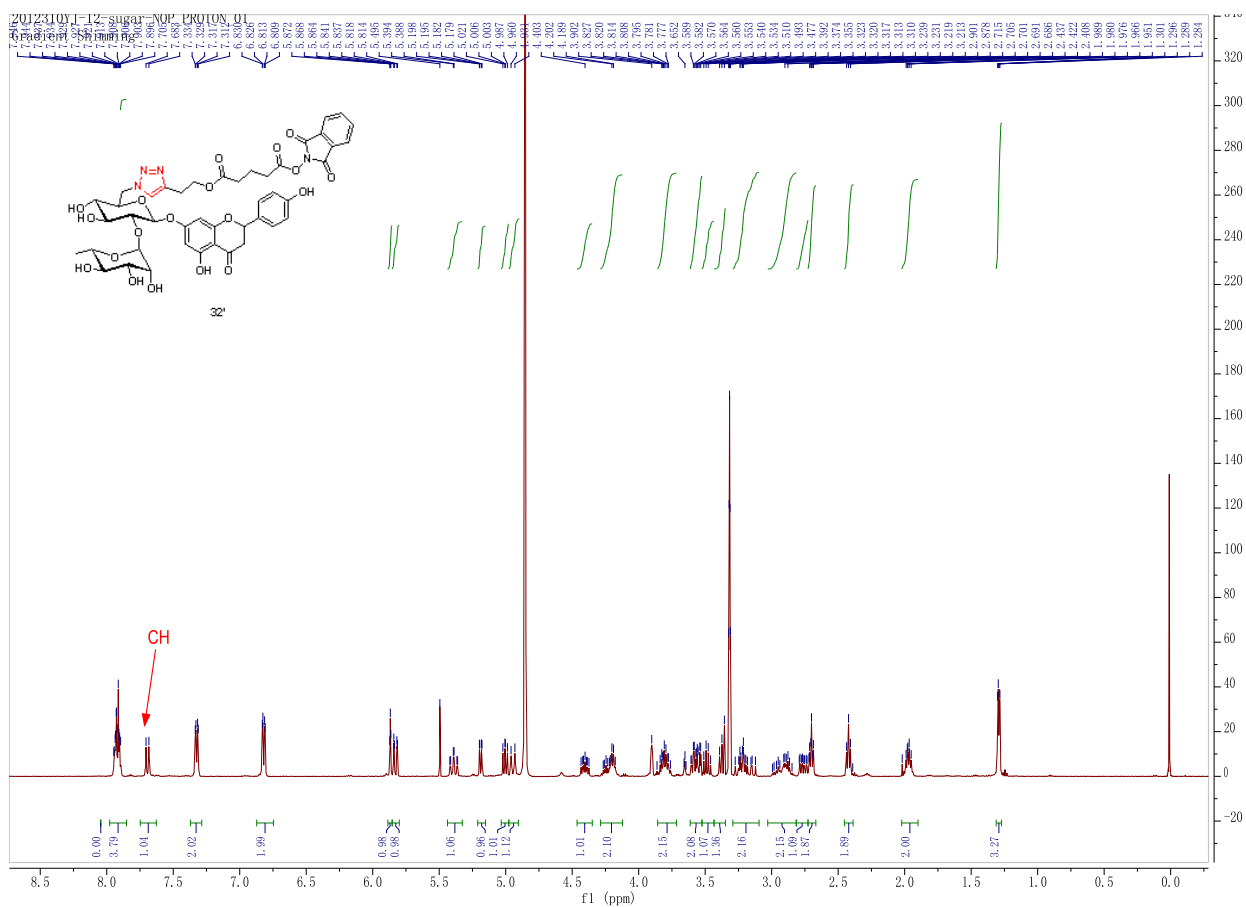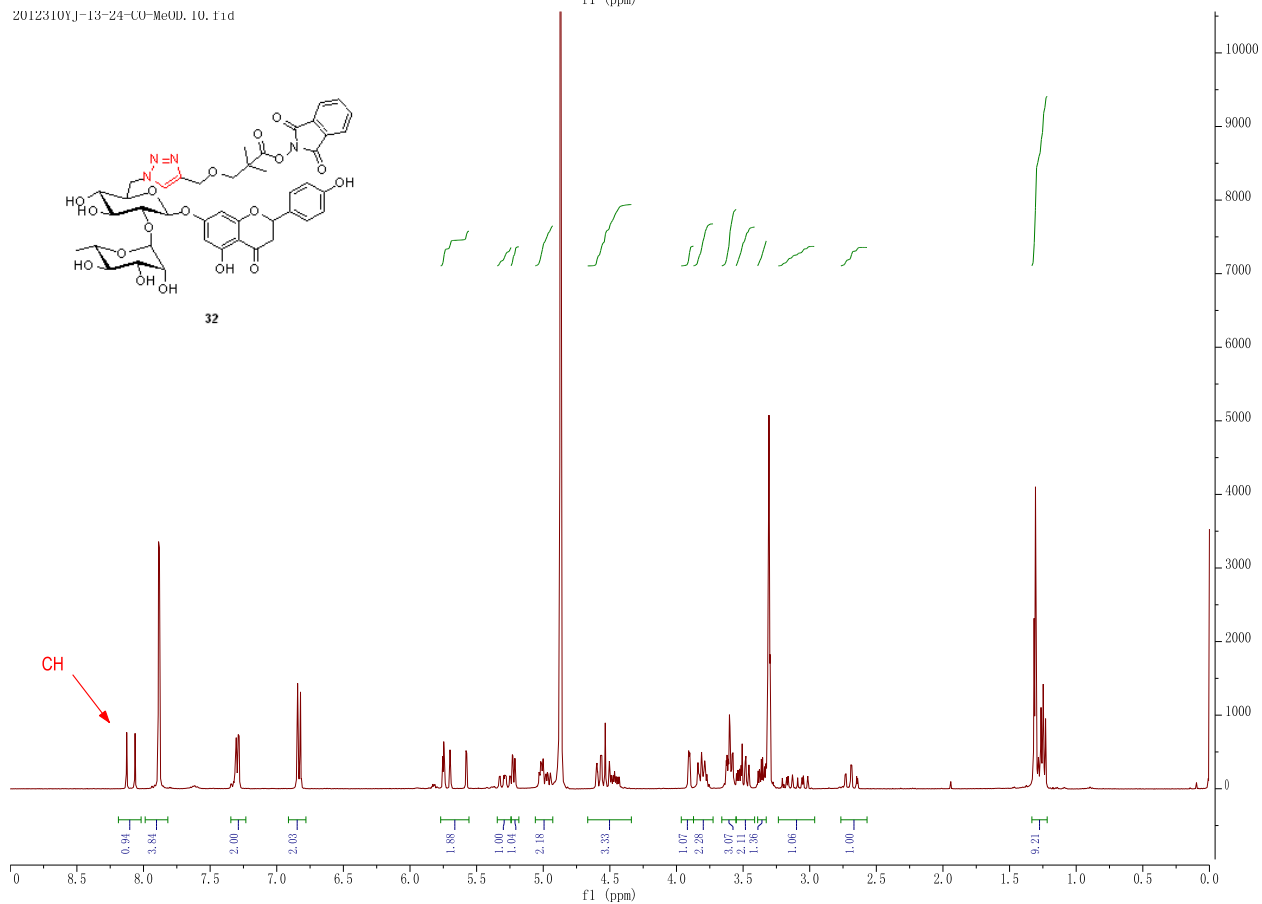

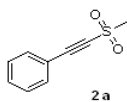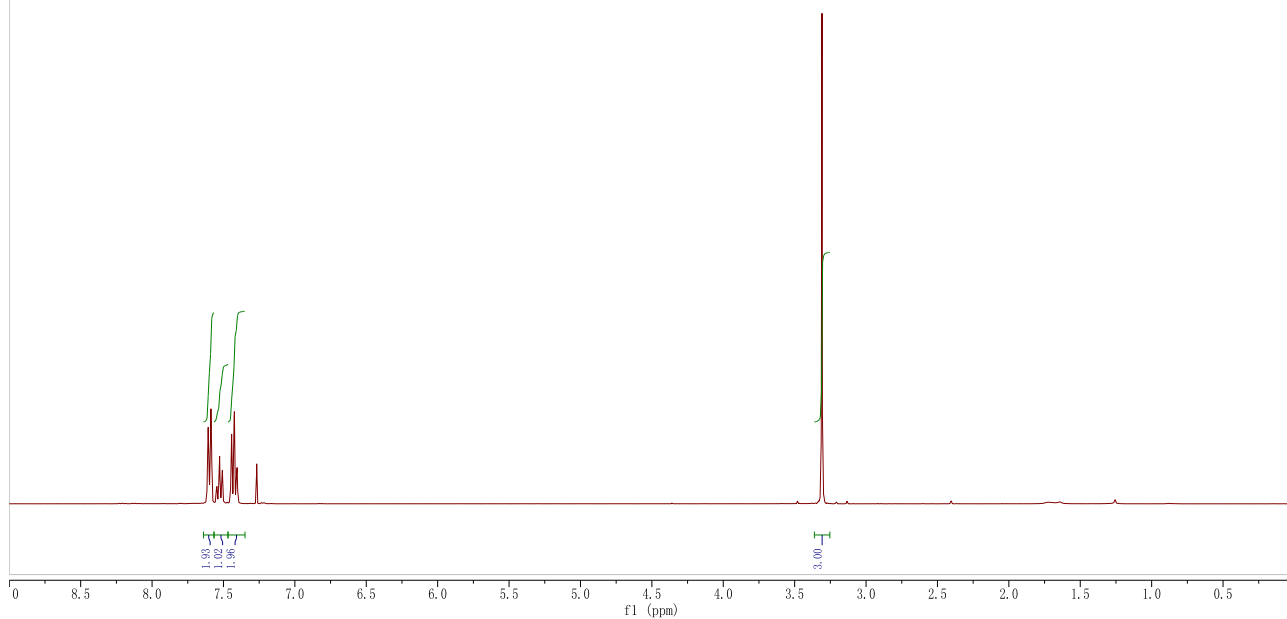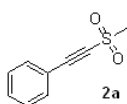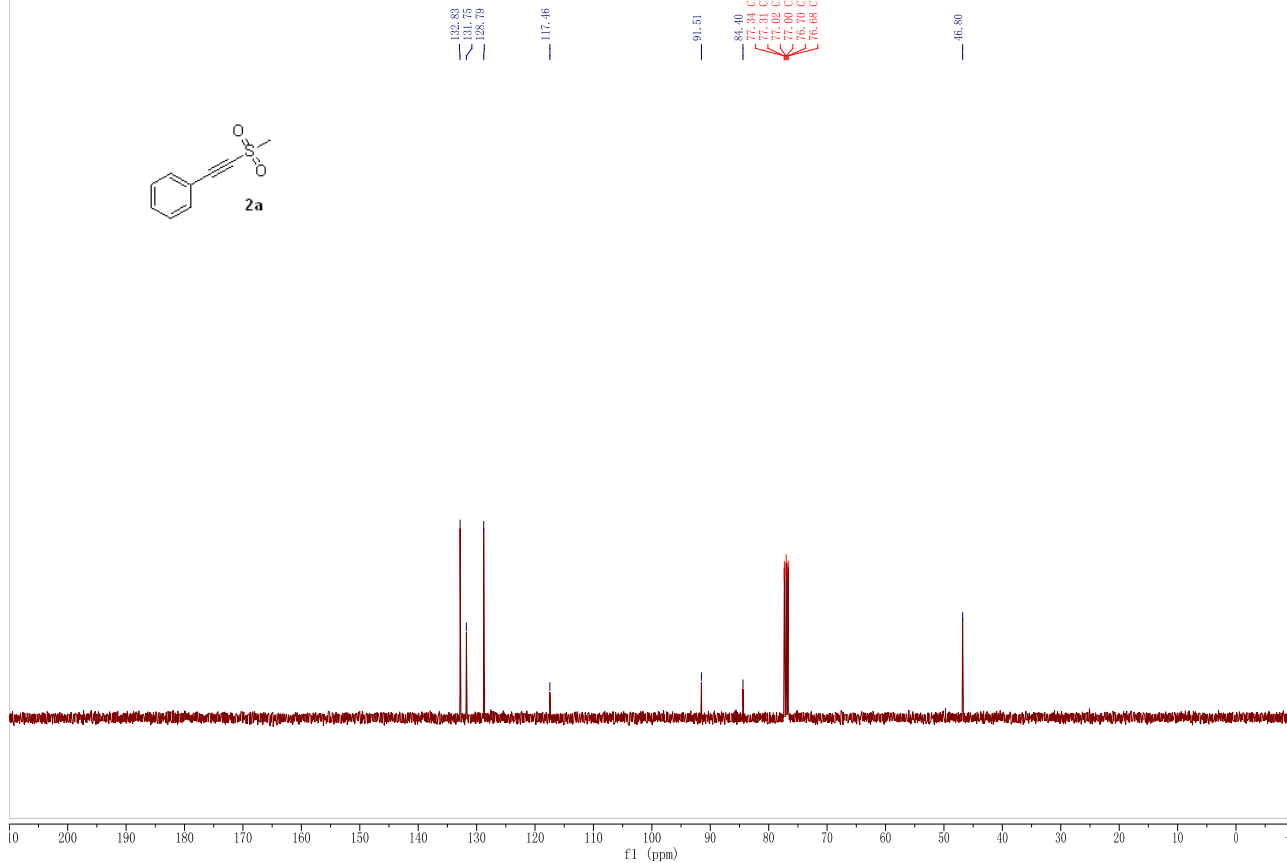

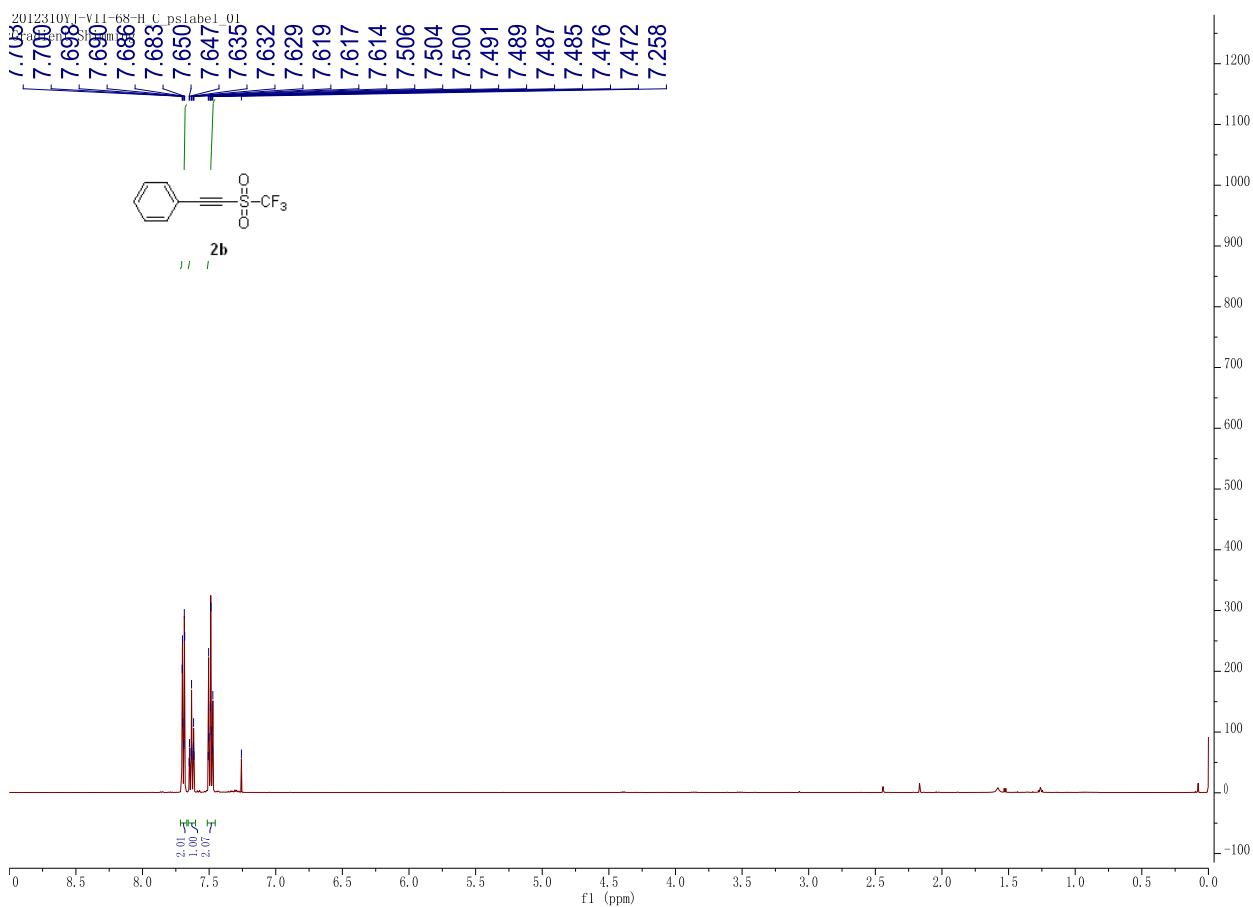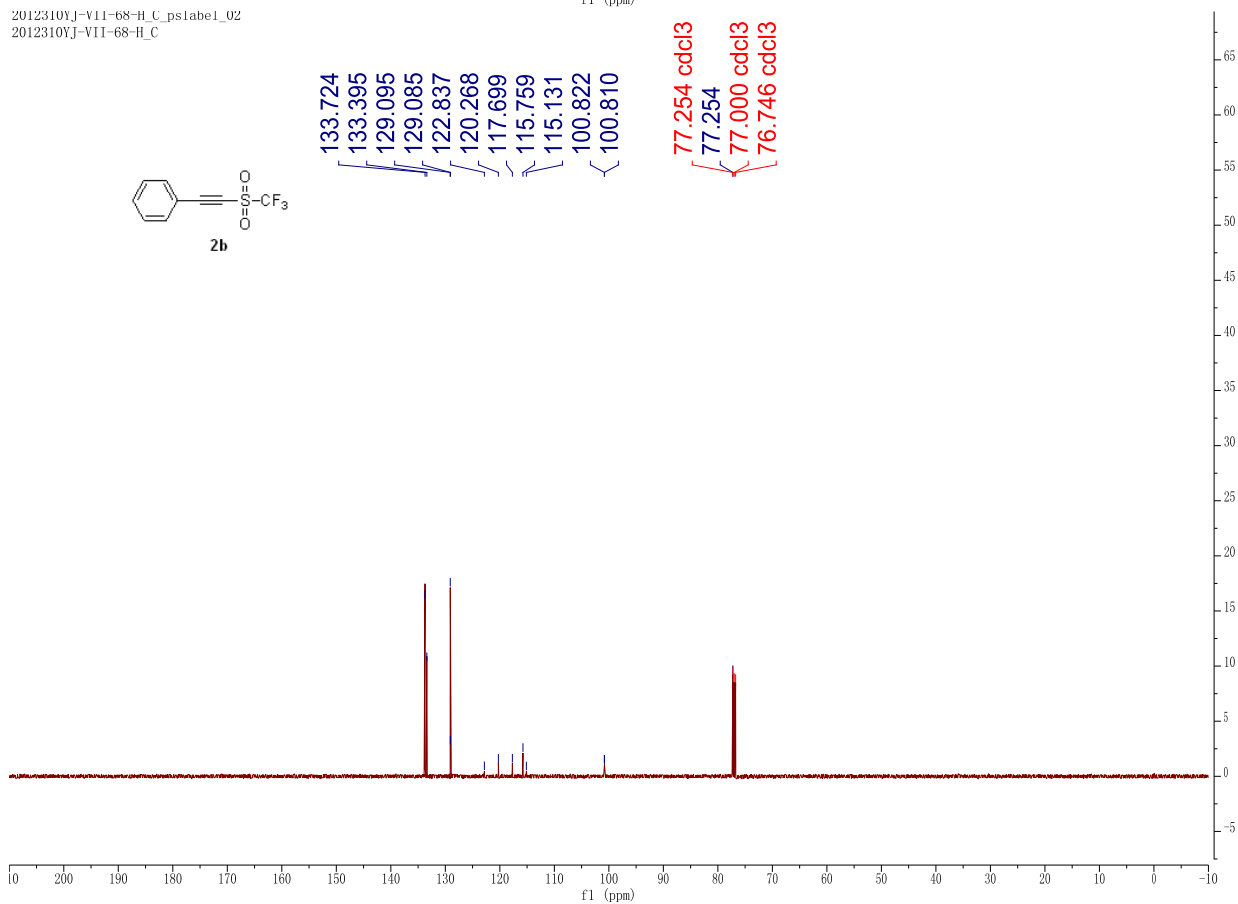

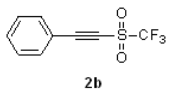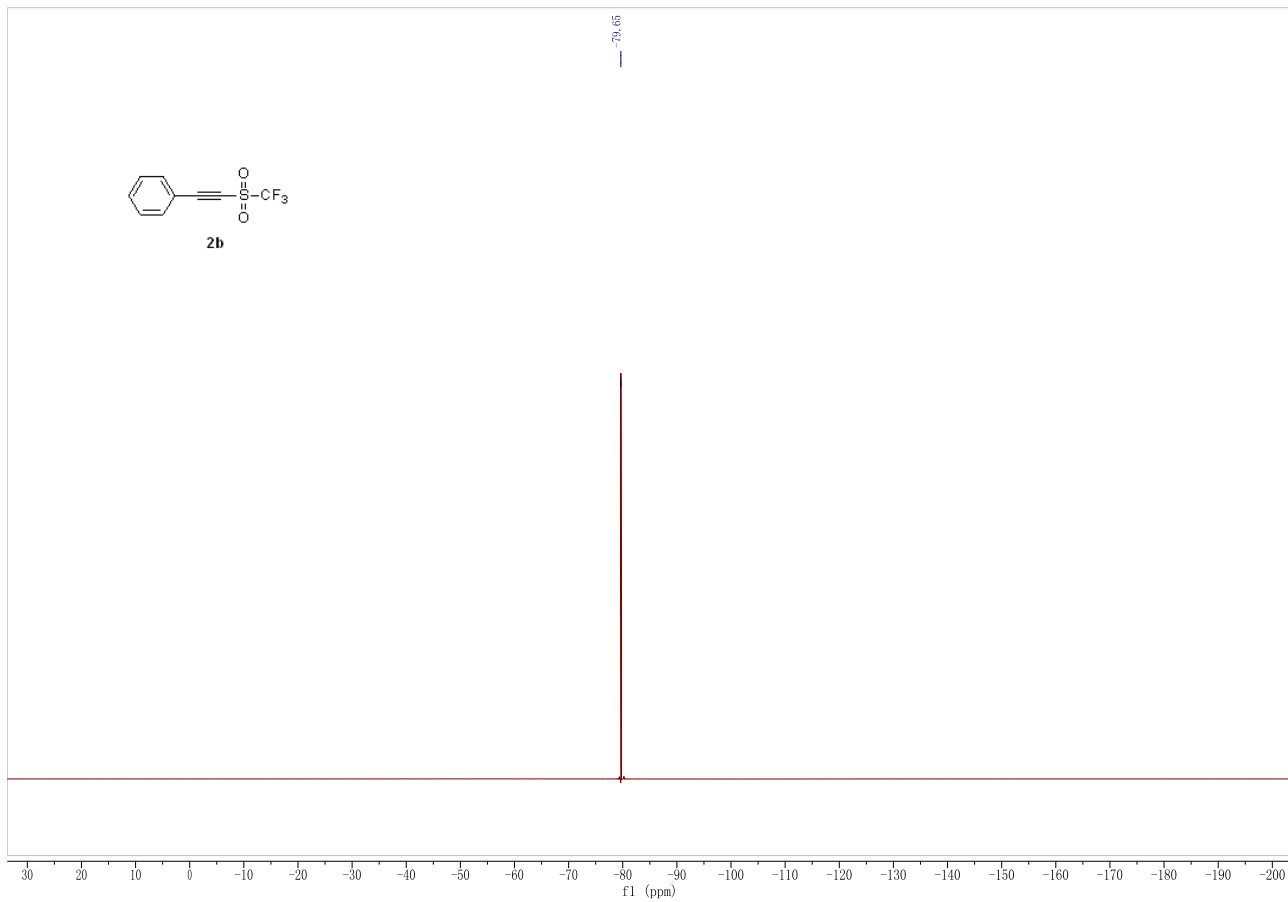



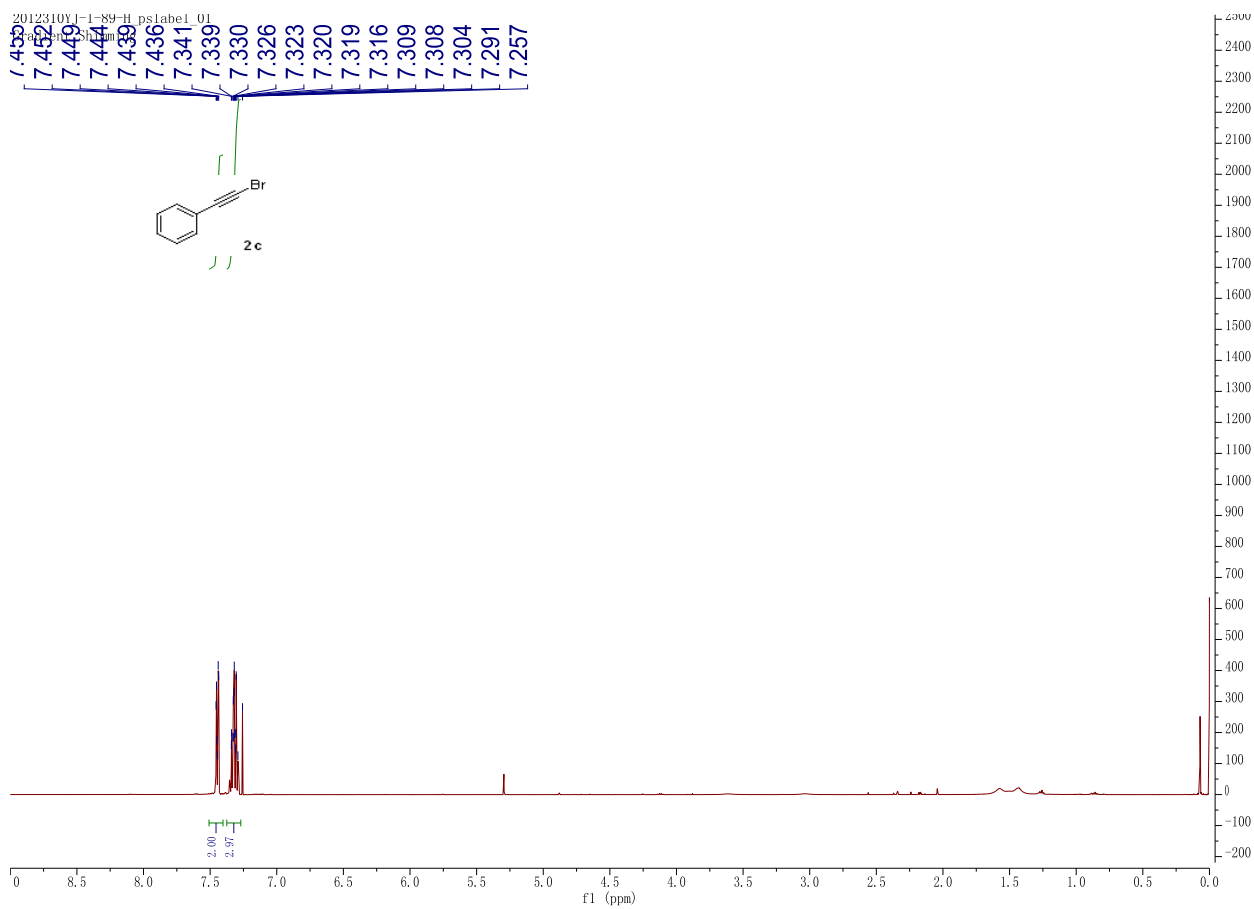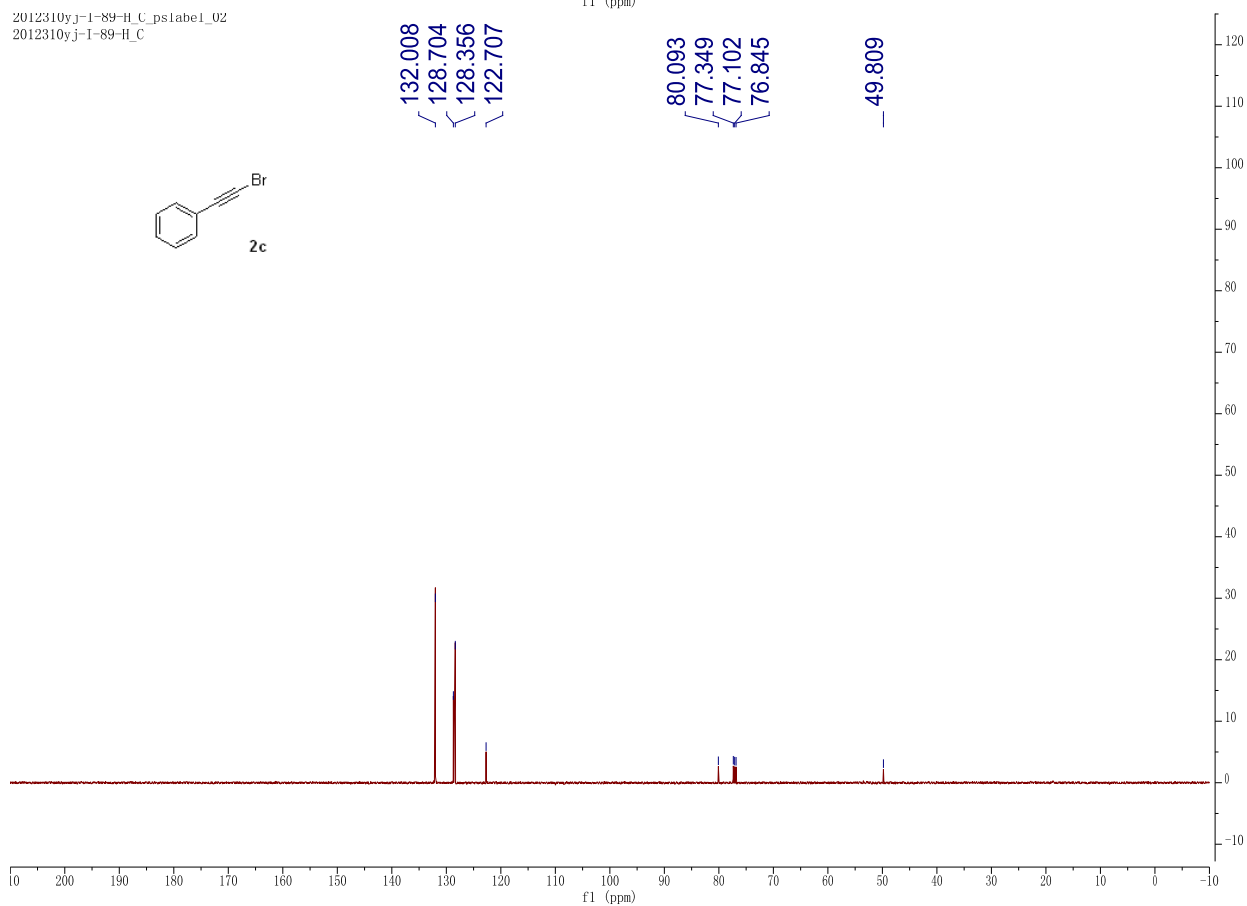

8.167  
8.152  
8.150  
8.096  
8.080  
7.969  
7.953  
7.871  
7.854  
7.786  
7.772  
7.701  
7.687  
7.638  
7.623  
7.608  
7.595  
7.593  
7.581  
7.579  
7.565  
7.551  
7.549  
7.459  
7.442  
7.428

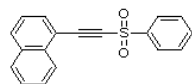

**4b**

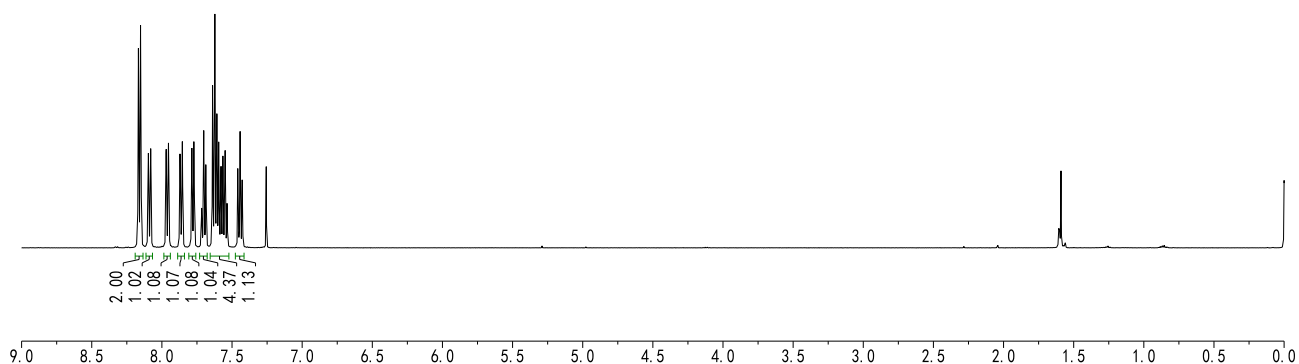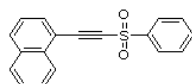

**4b**

142.060  
142.021  
134.157  
133.195  
133.076  
132.841  
132.303  
129.414  
128.615  
128.037  
127.370  
127.129  
125.247  
124.951  
115.324  
115.281  
92.529  
92.527  
89.818  
89.816  
77.255 cdc13  
77.000 cdc13  
76.746 cdc13

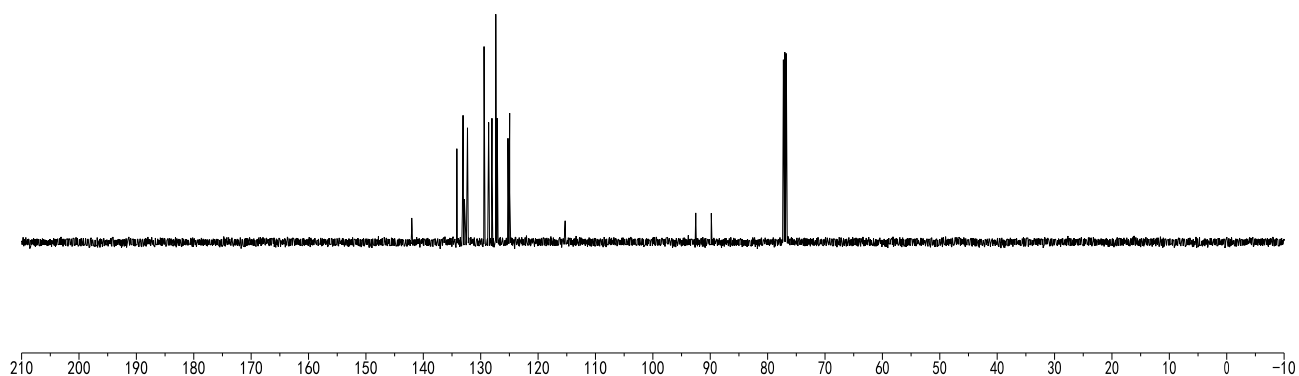

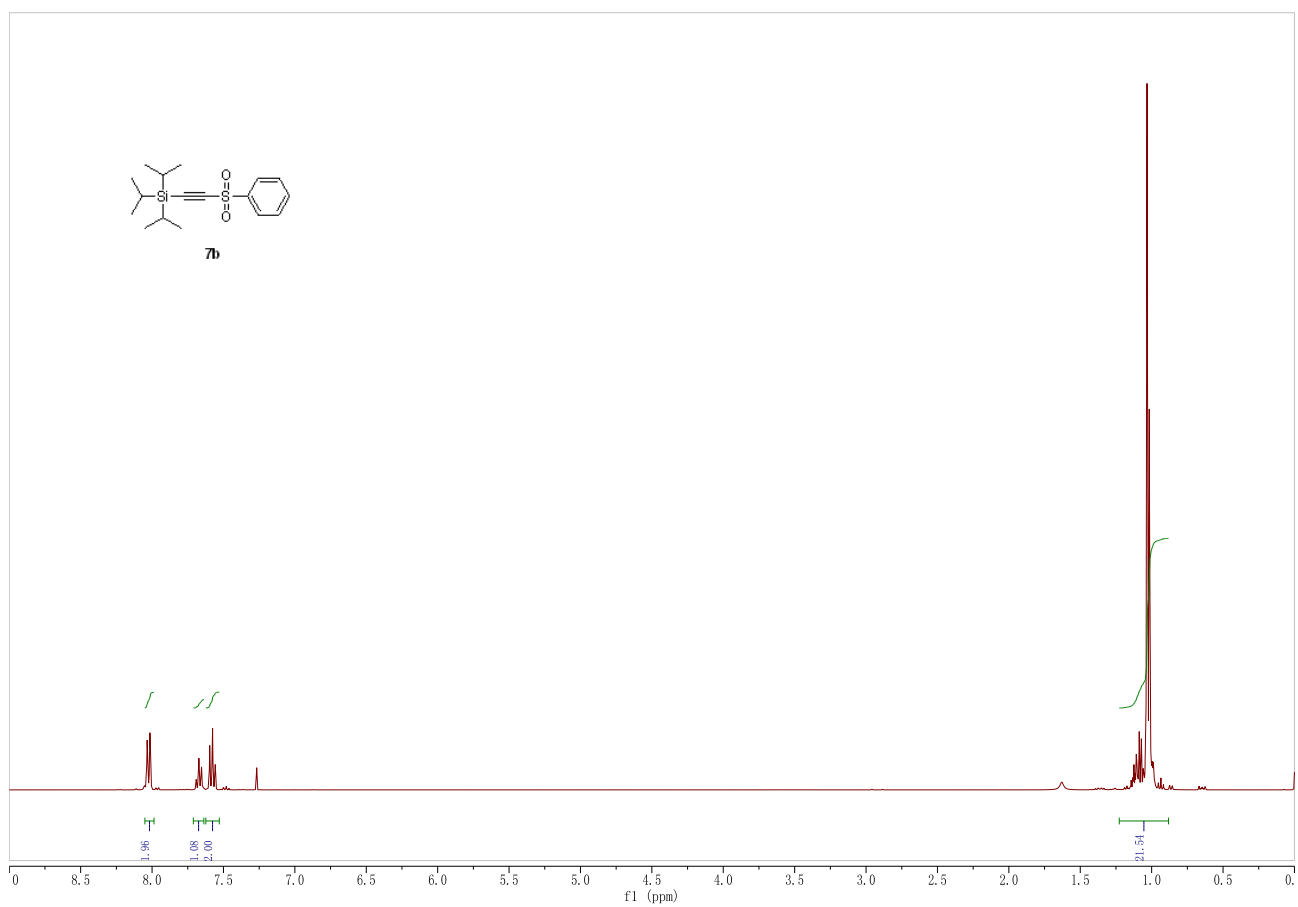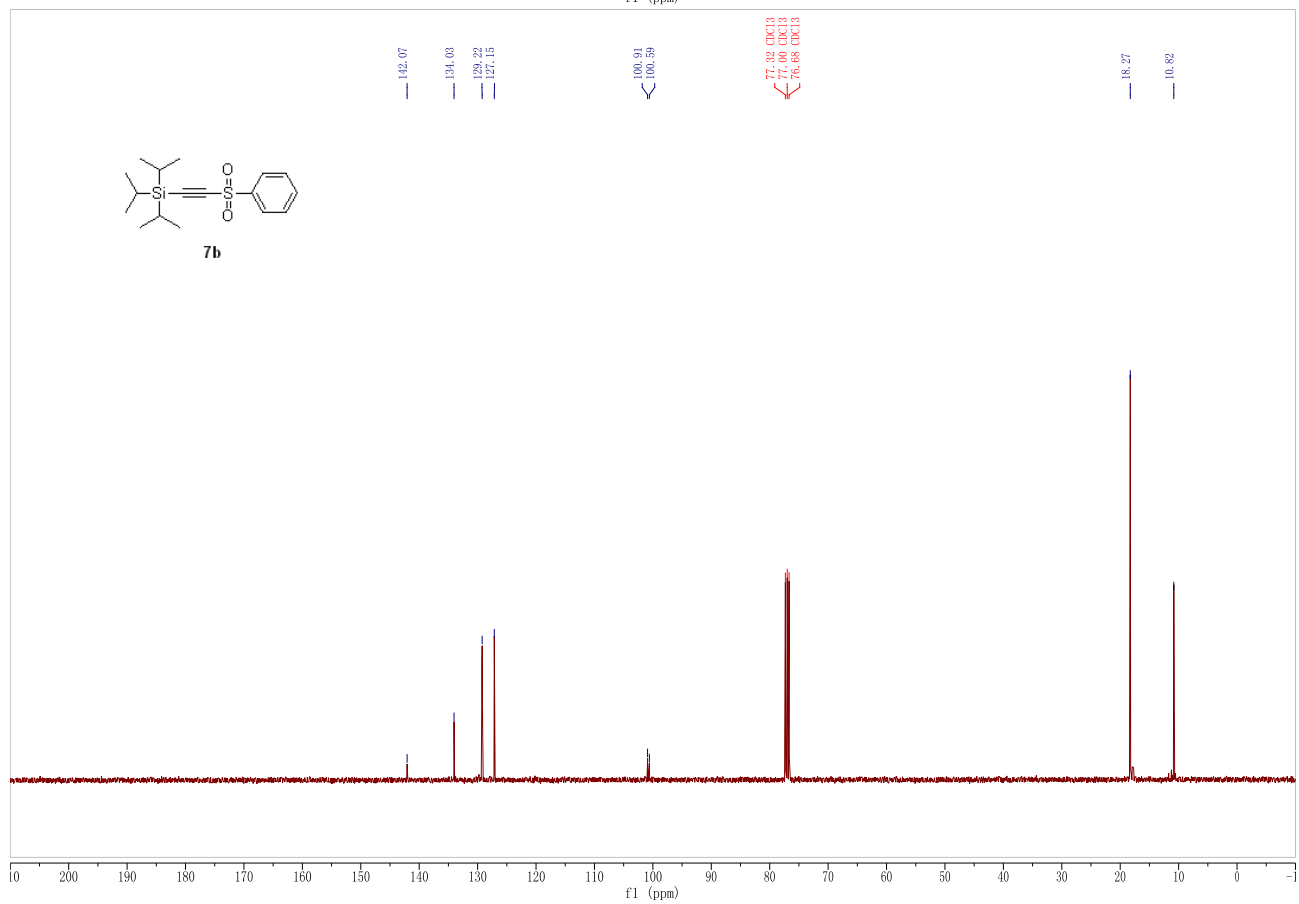

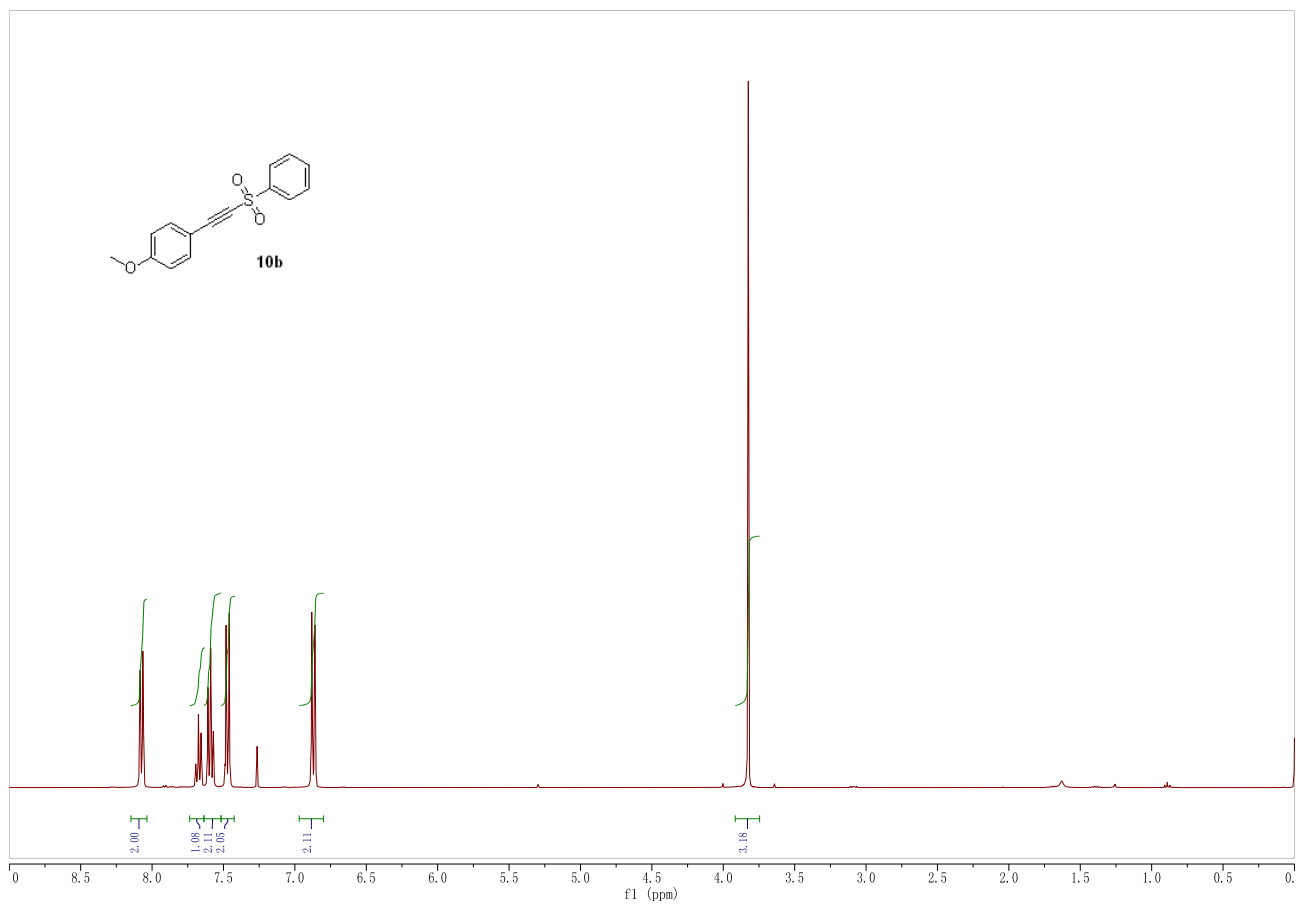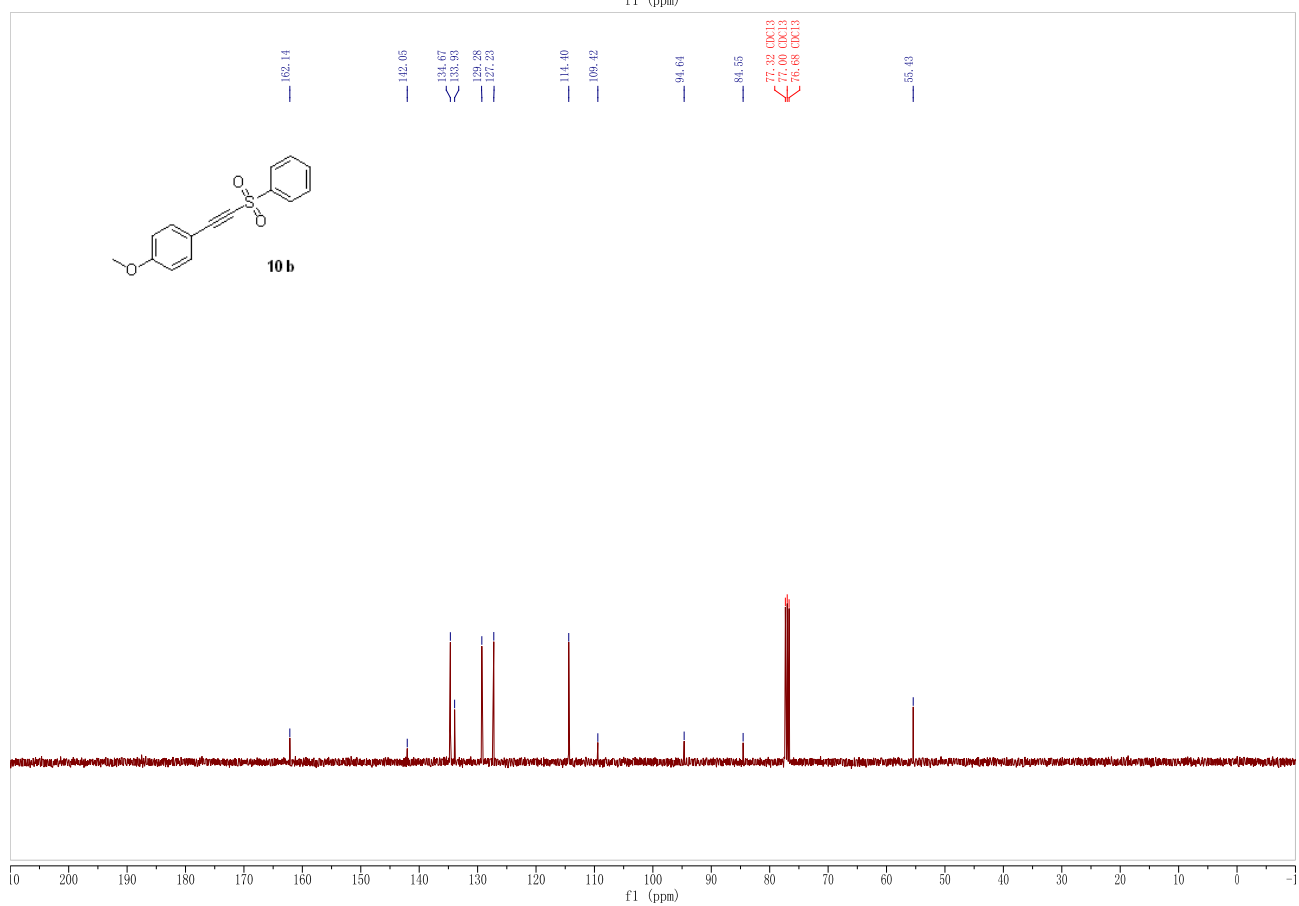

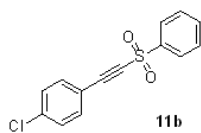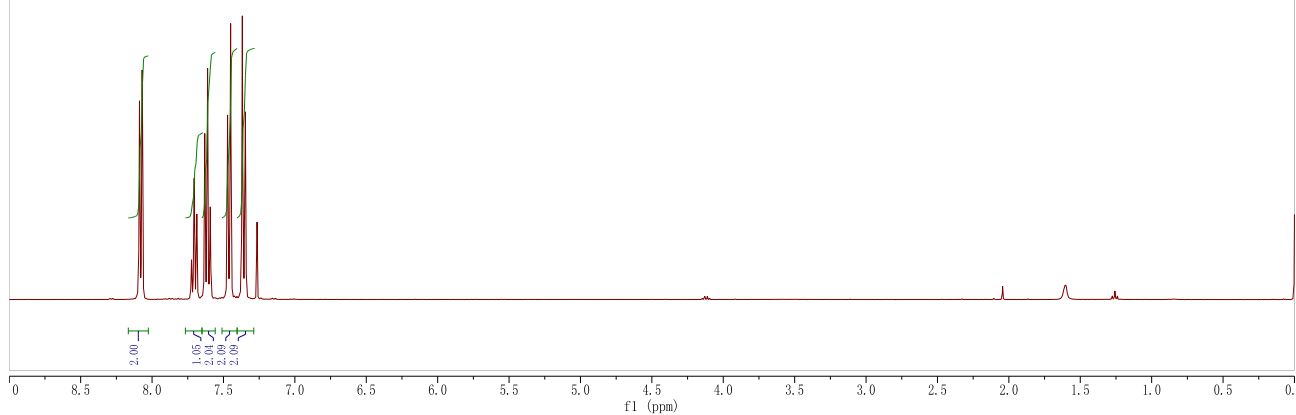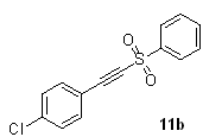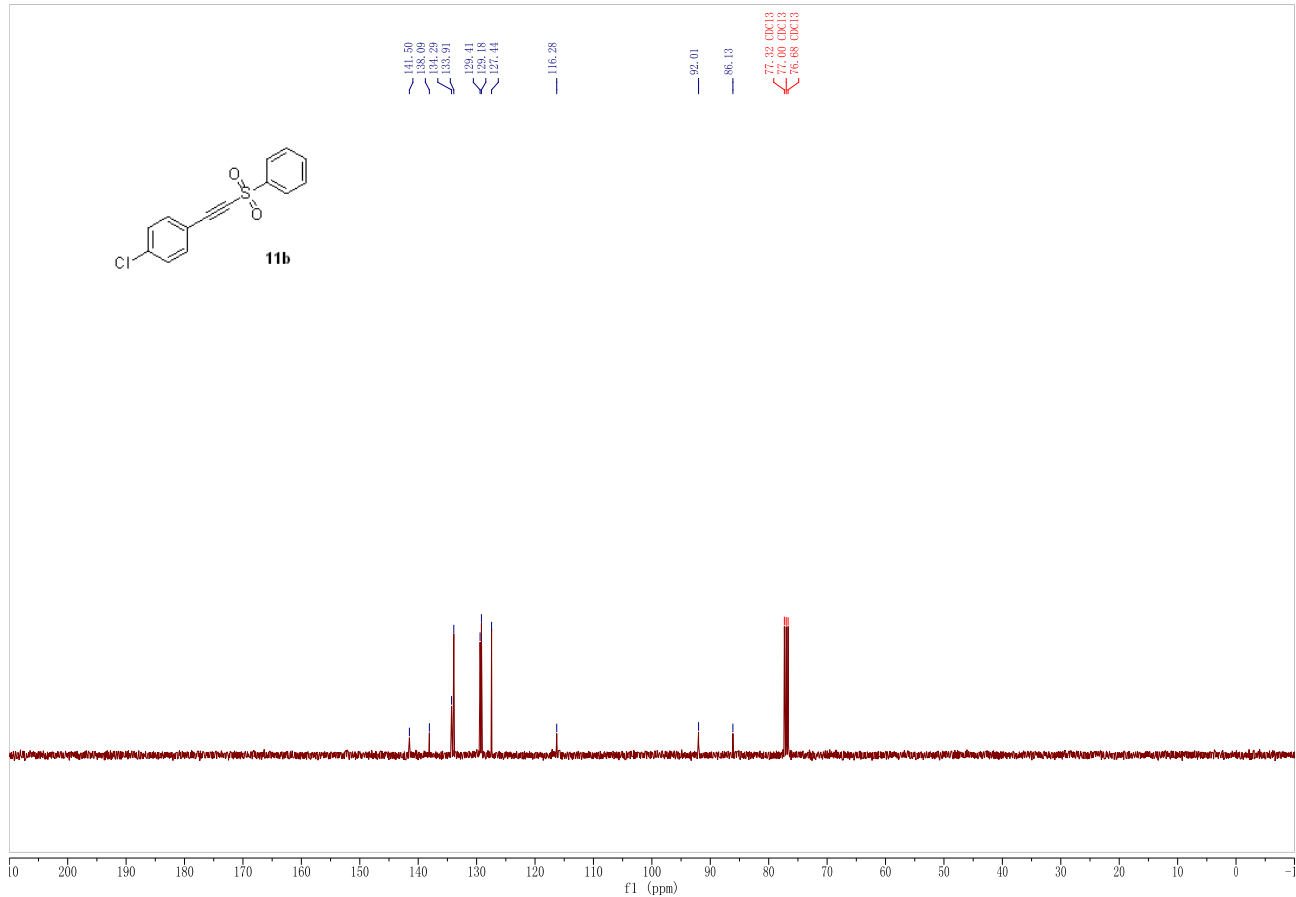

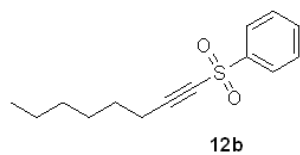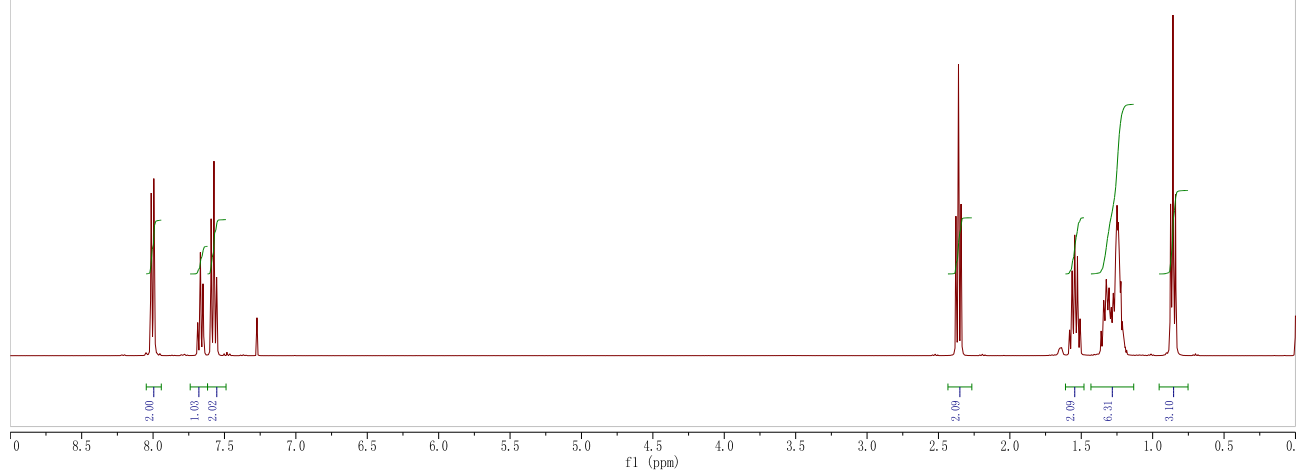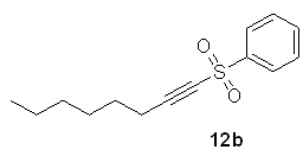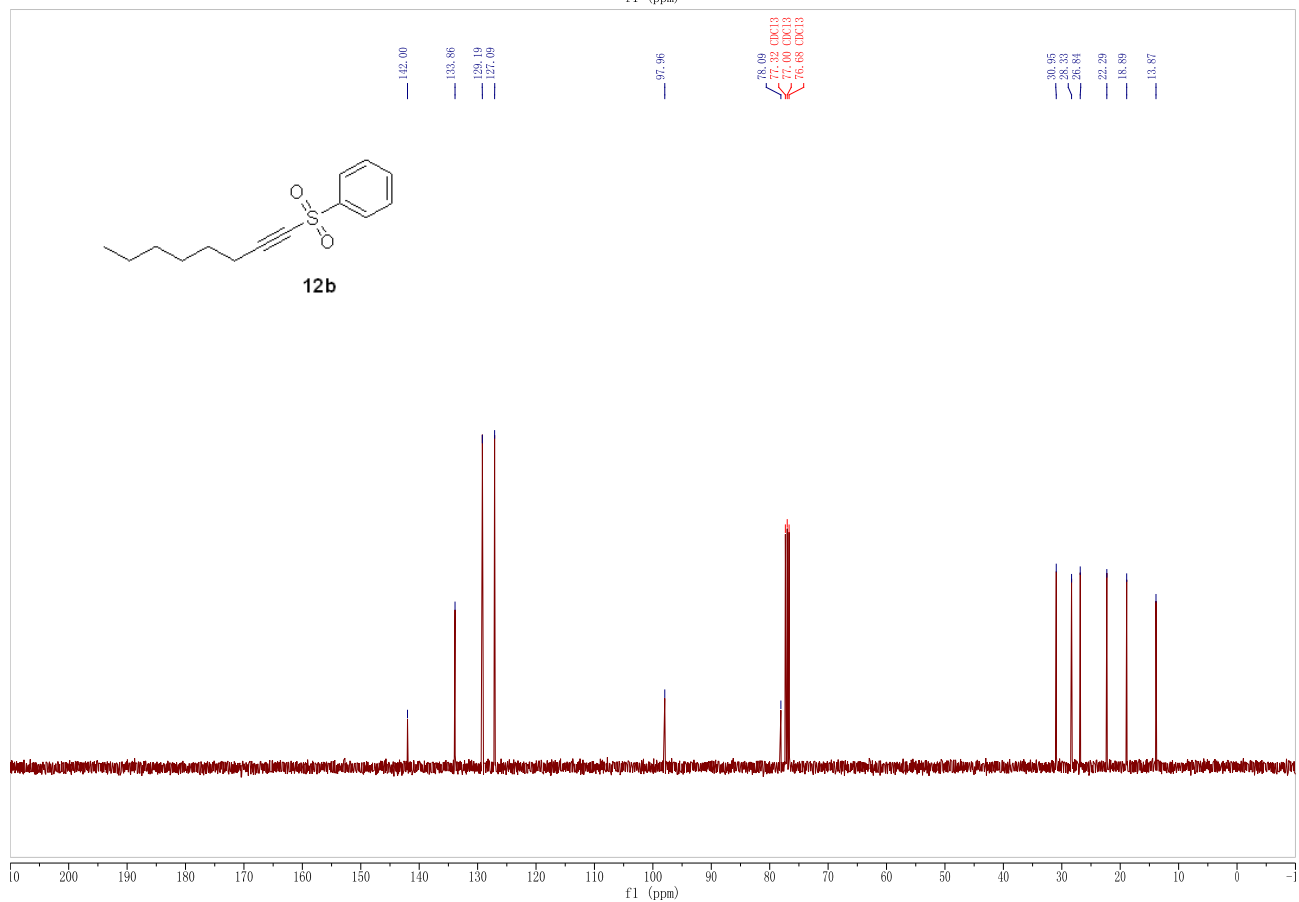

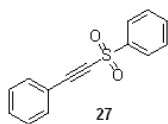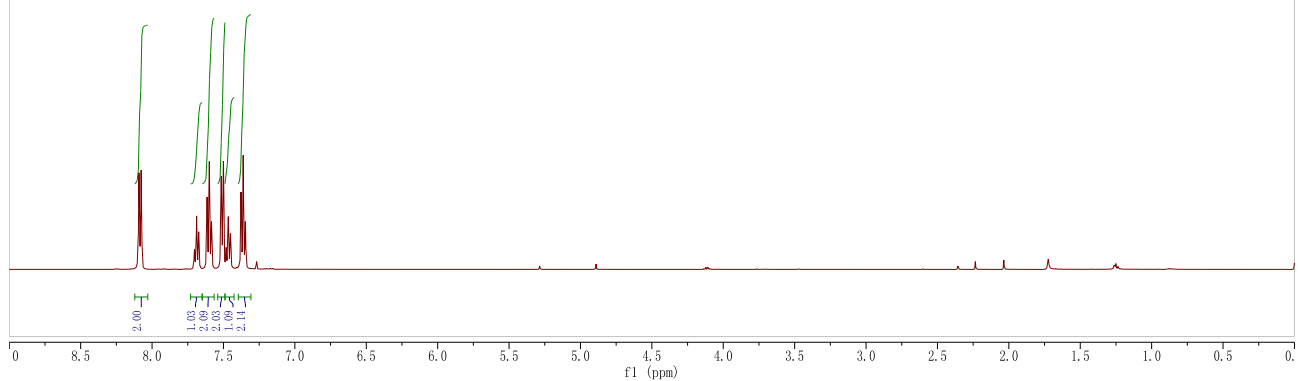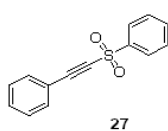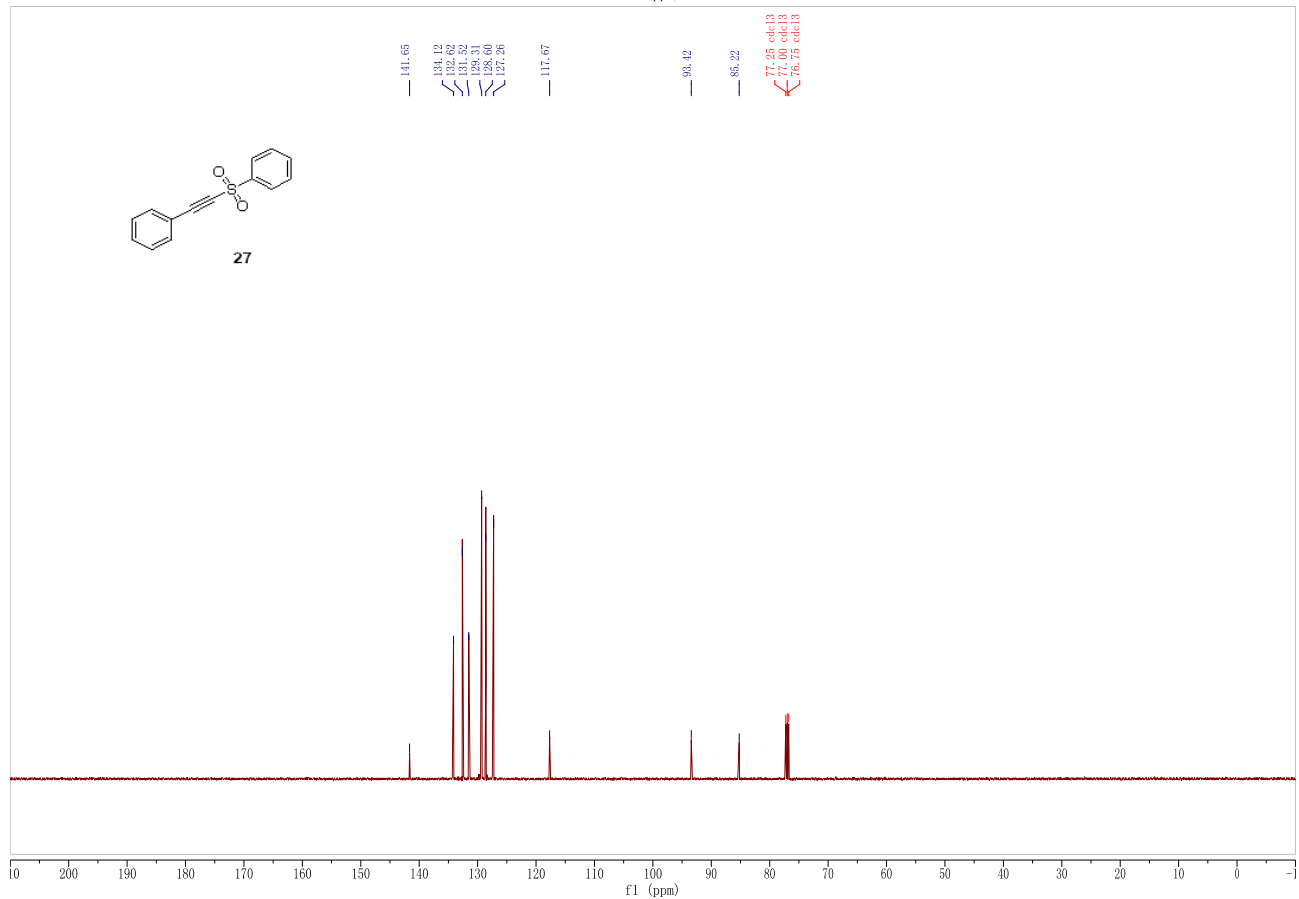

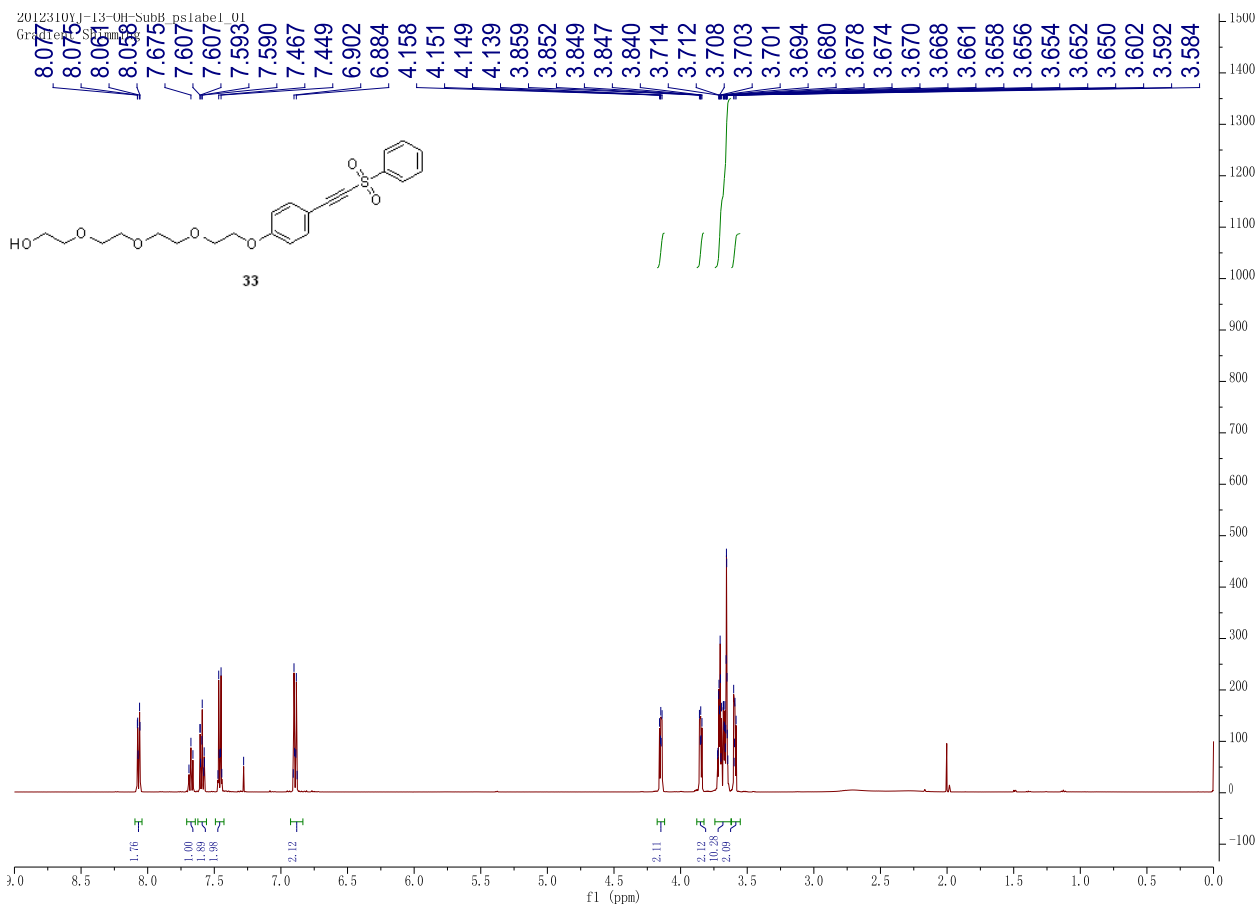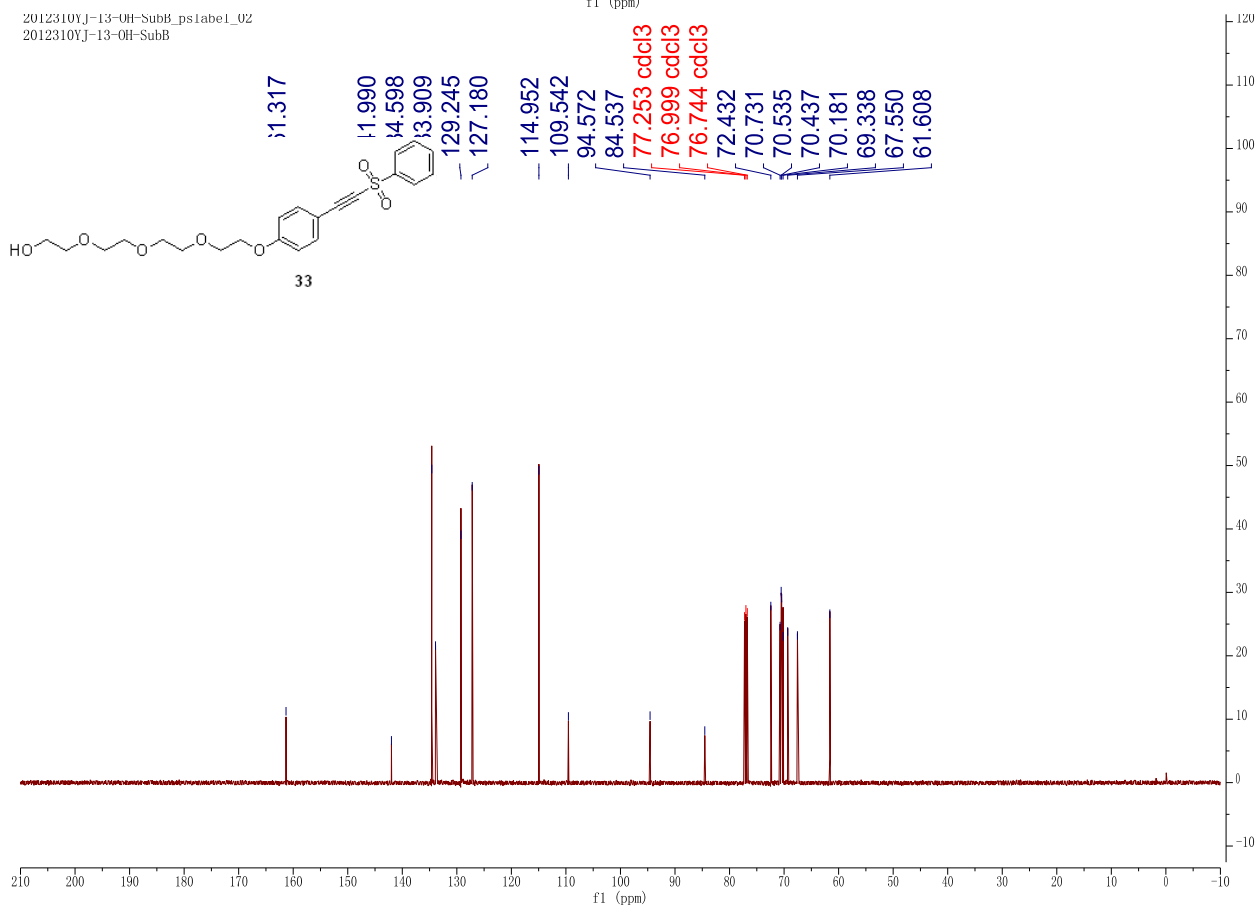



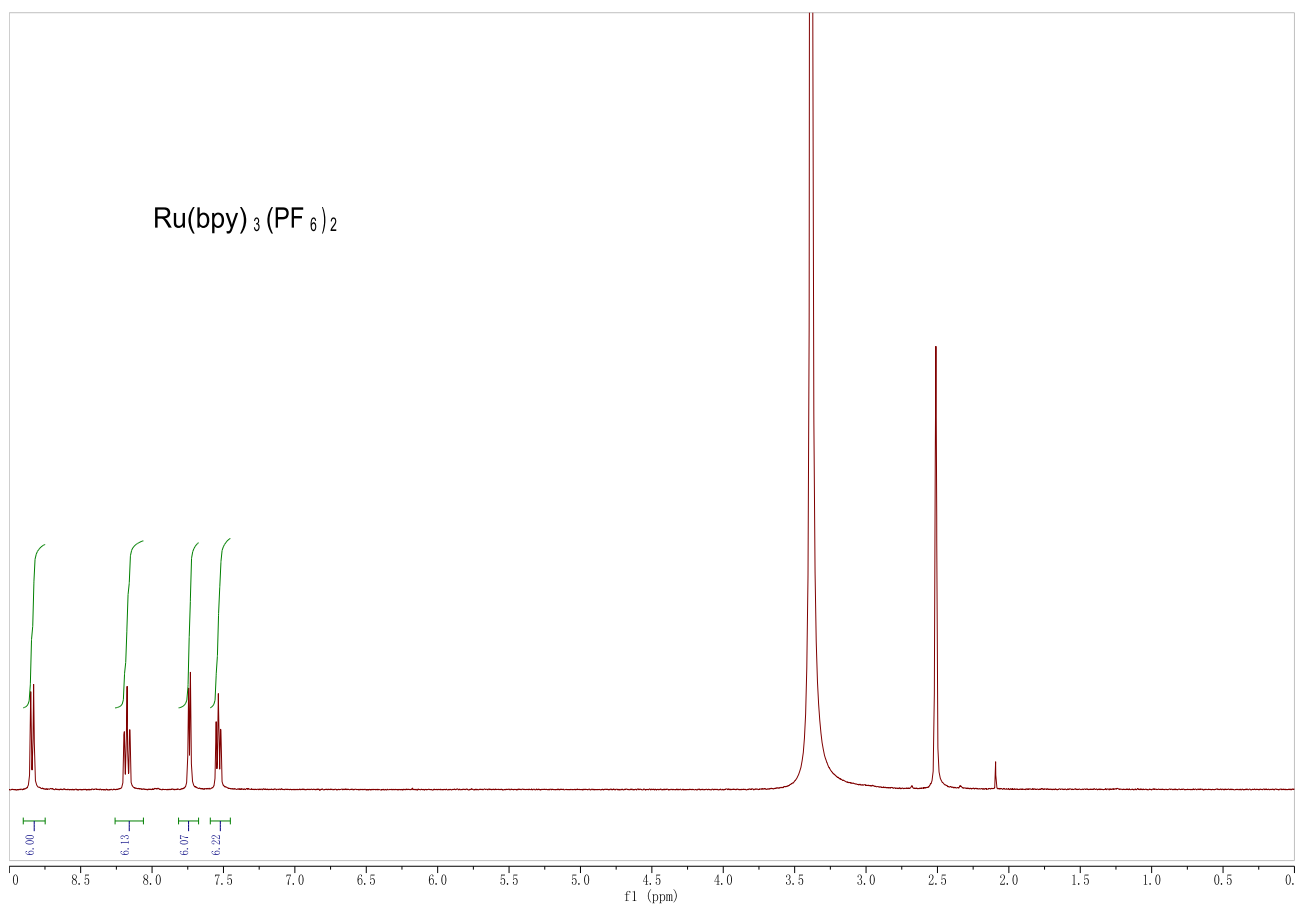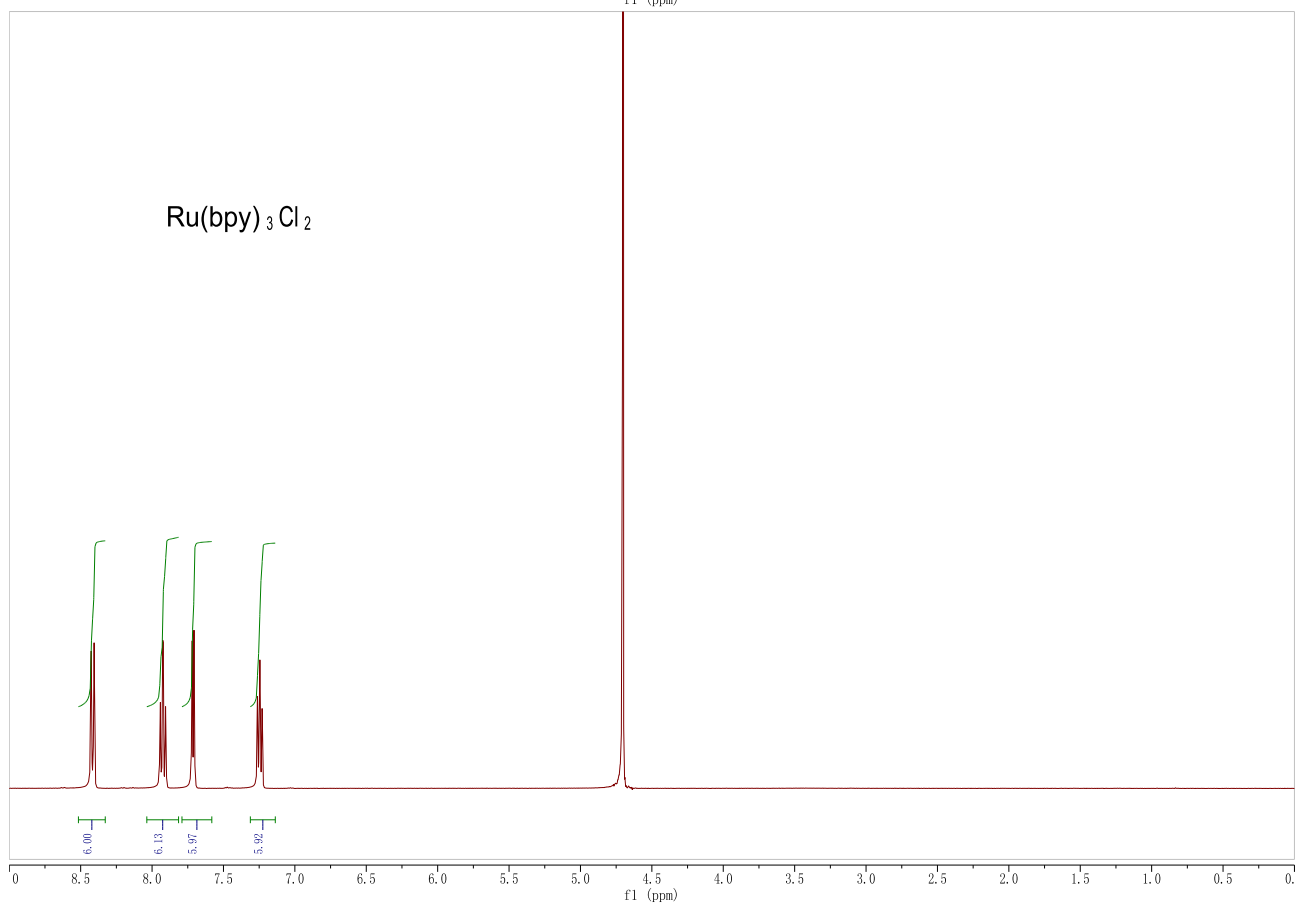

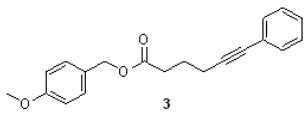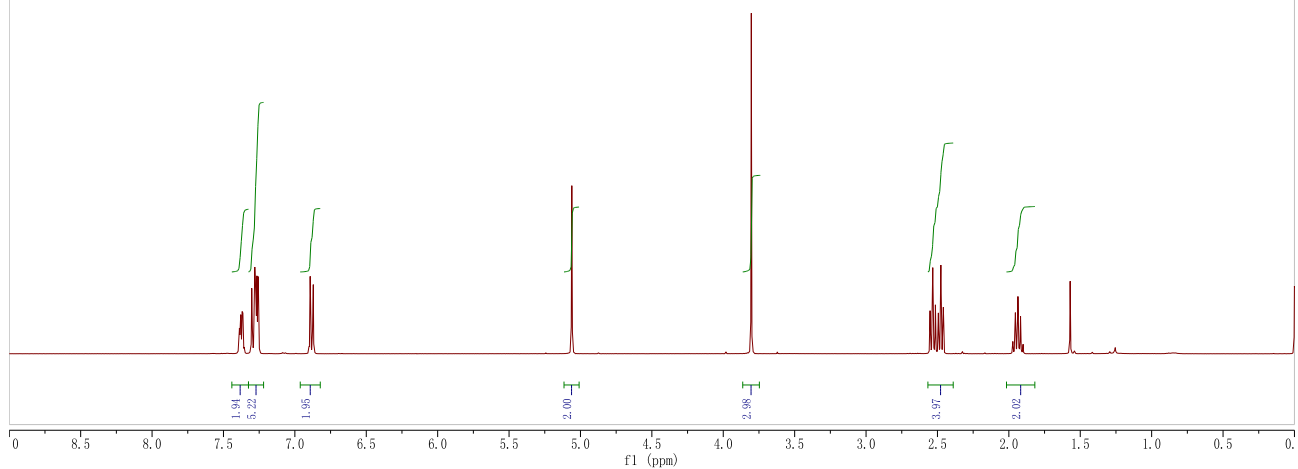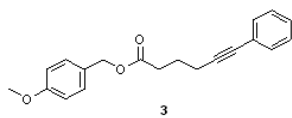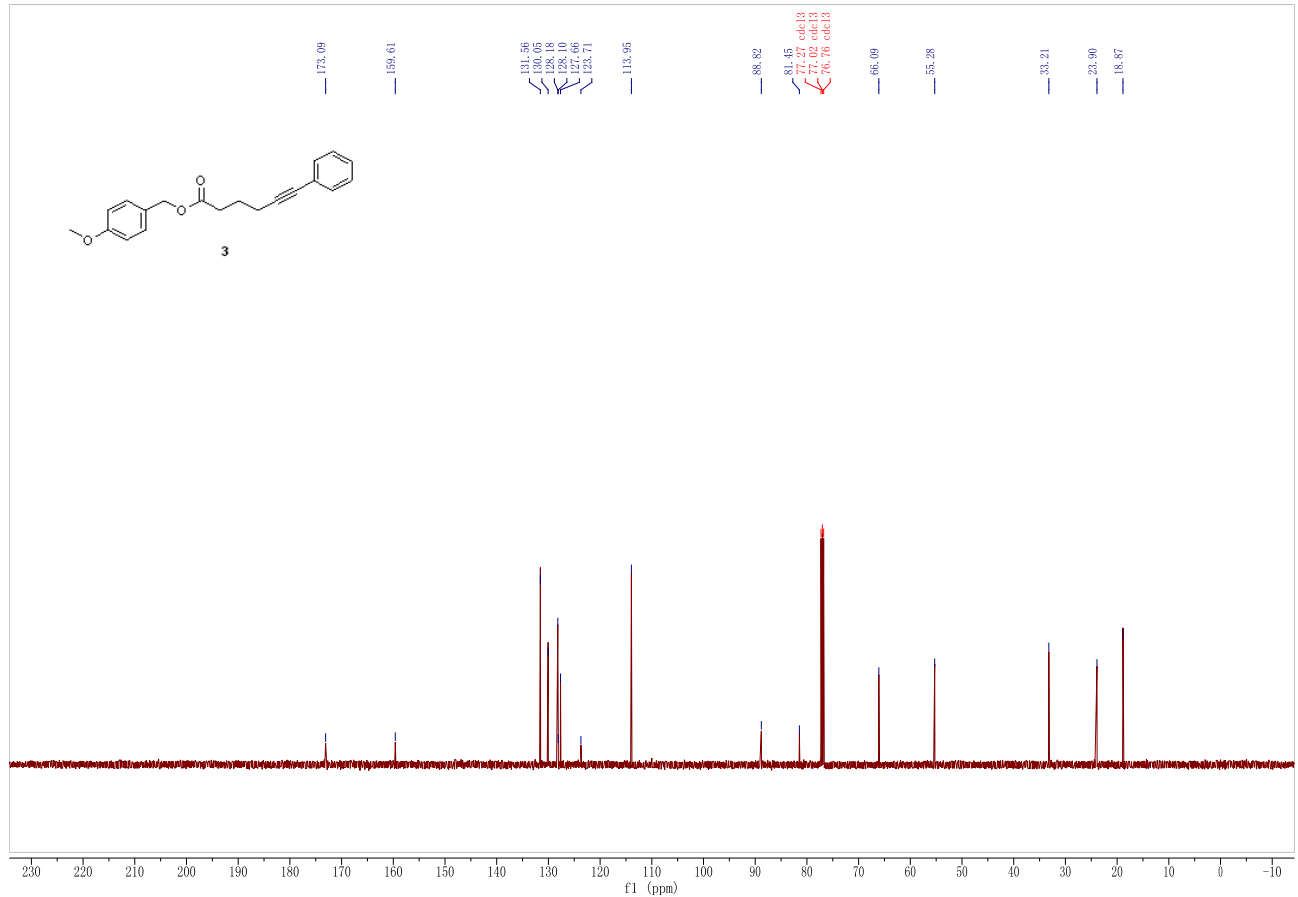

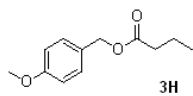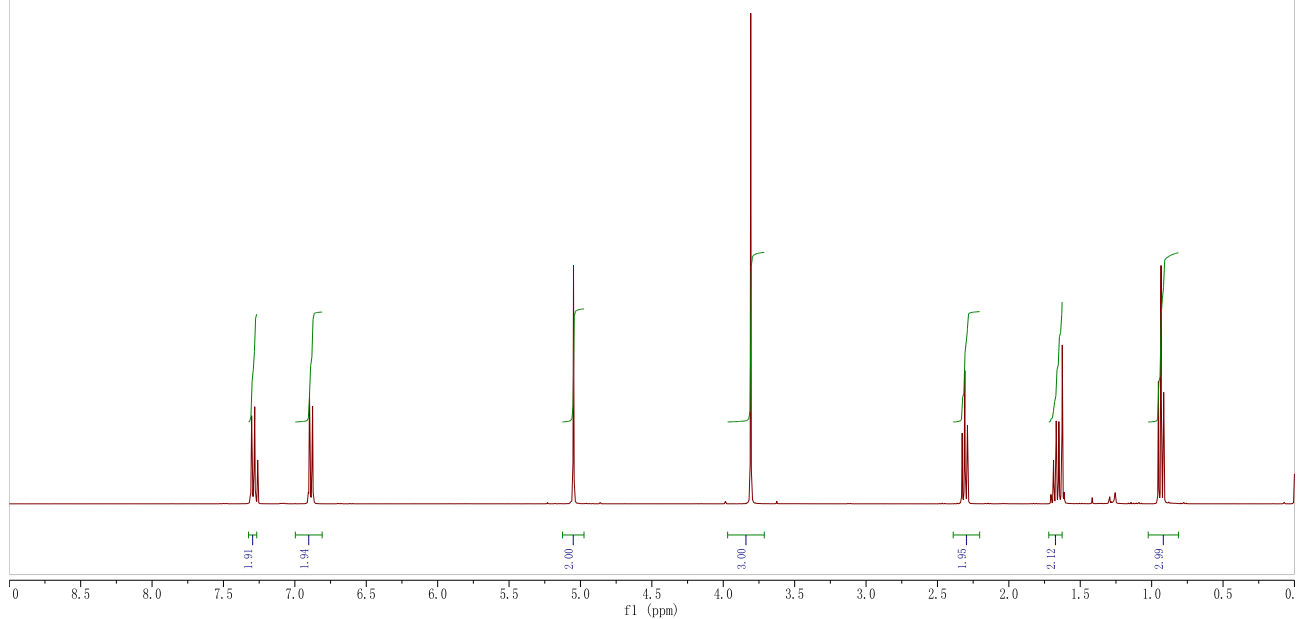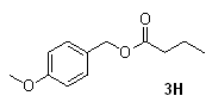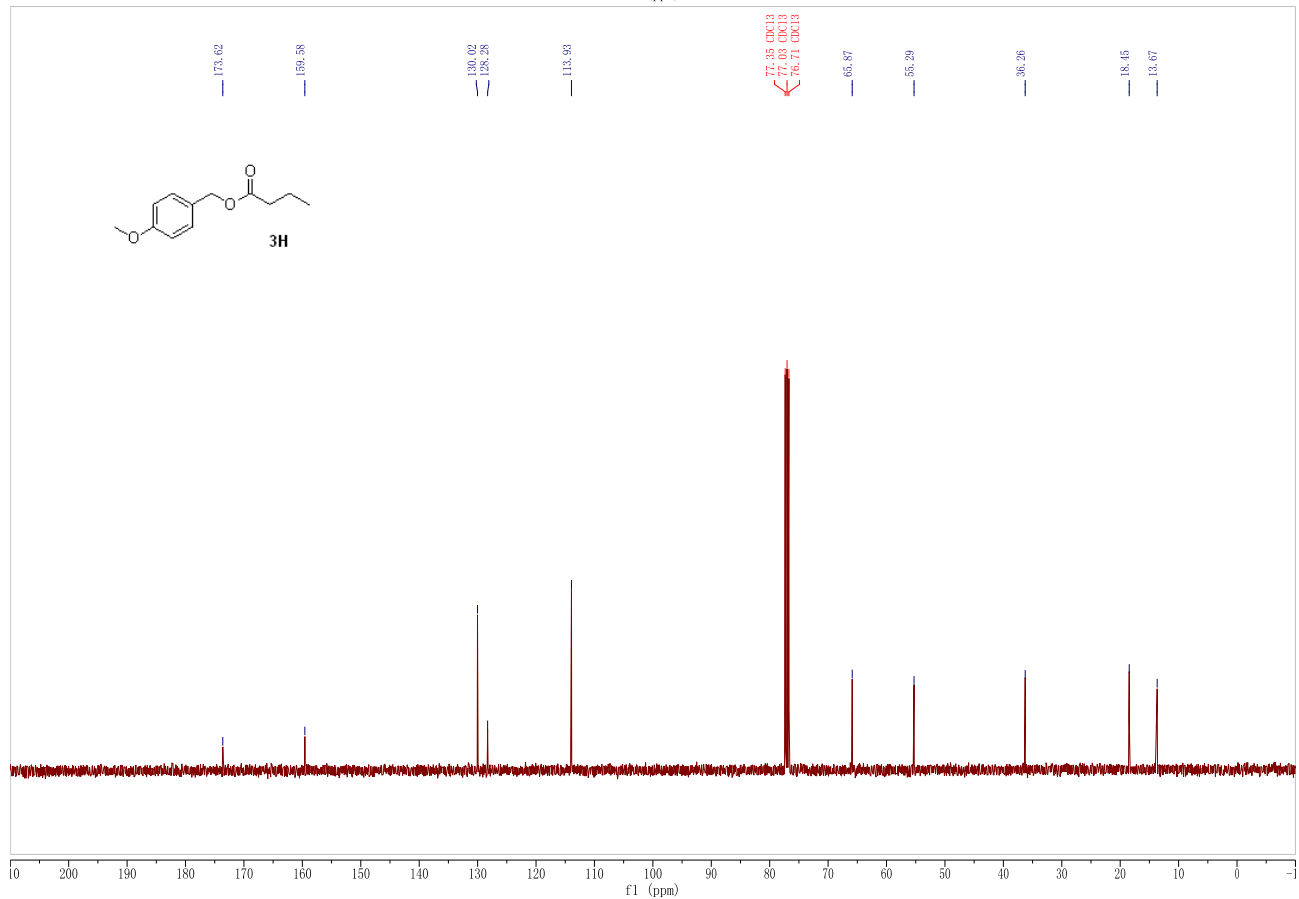

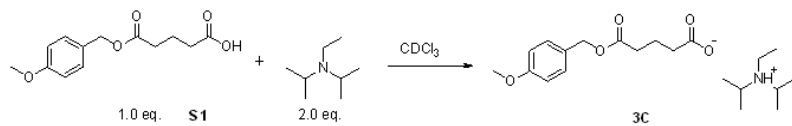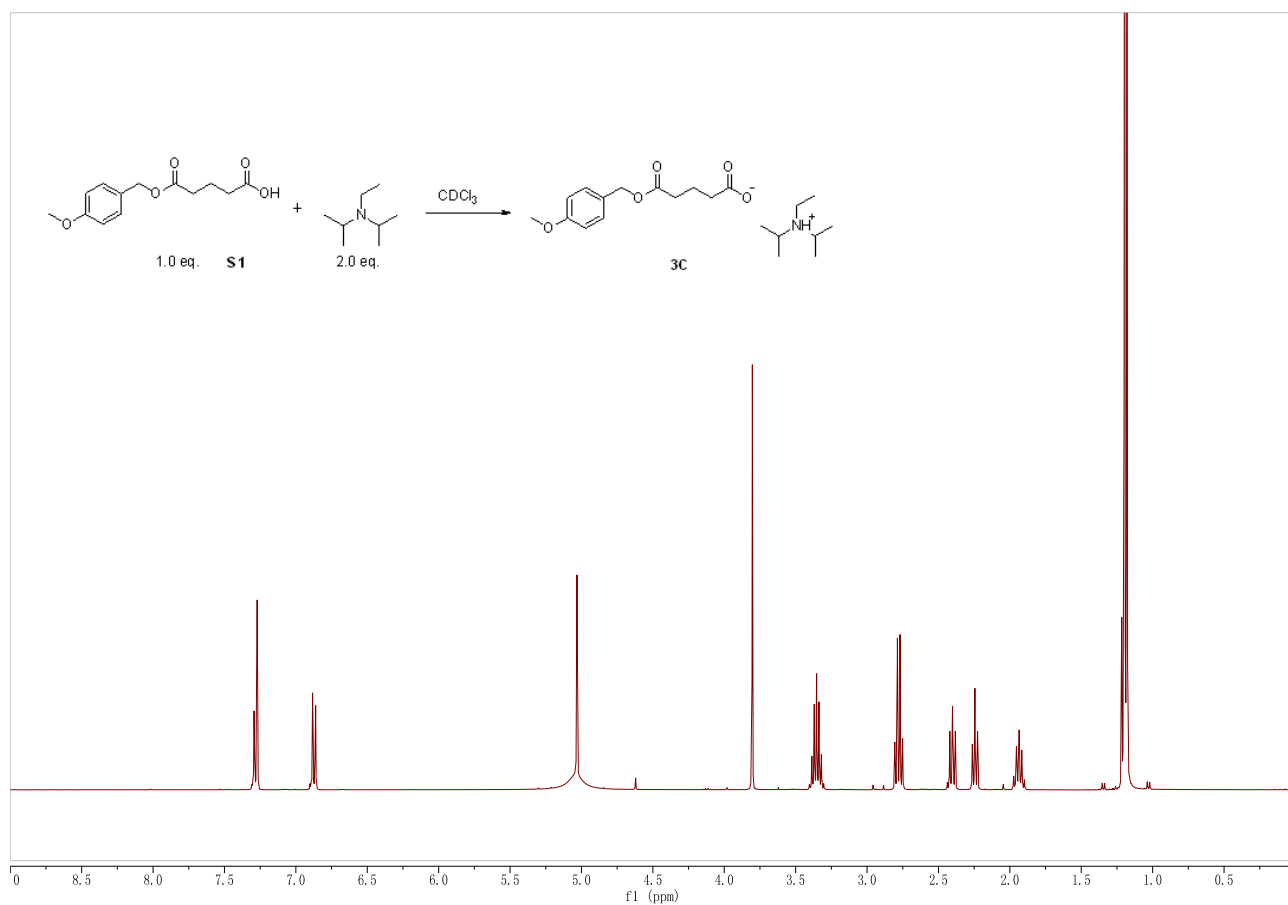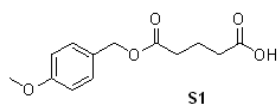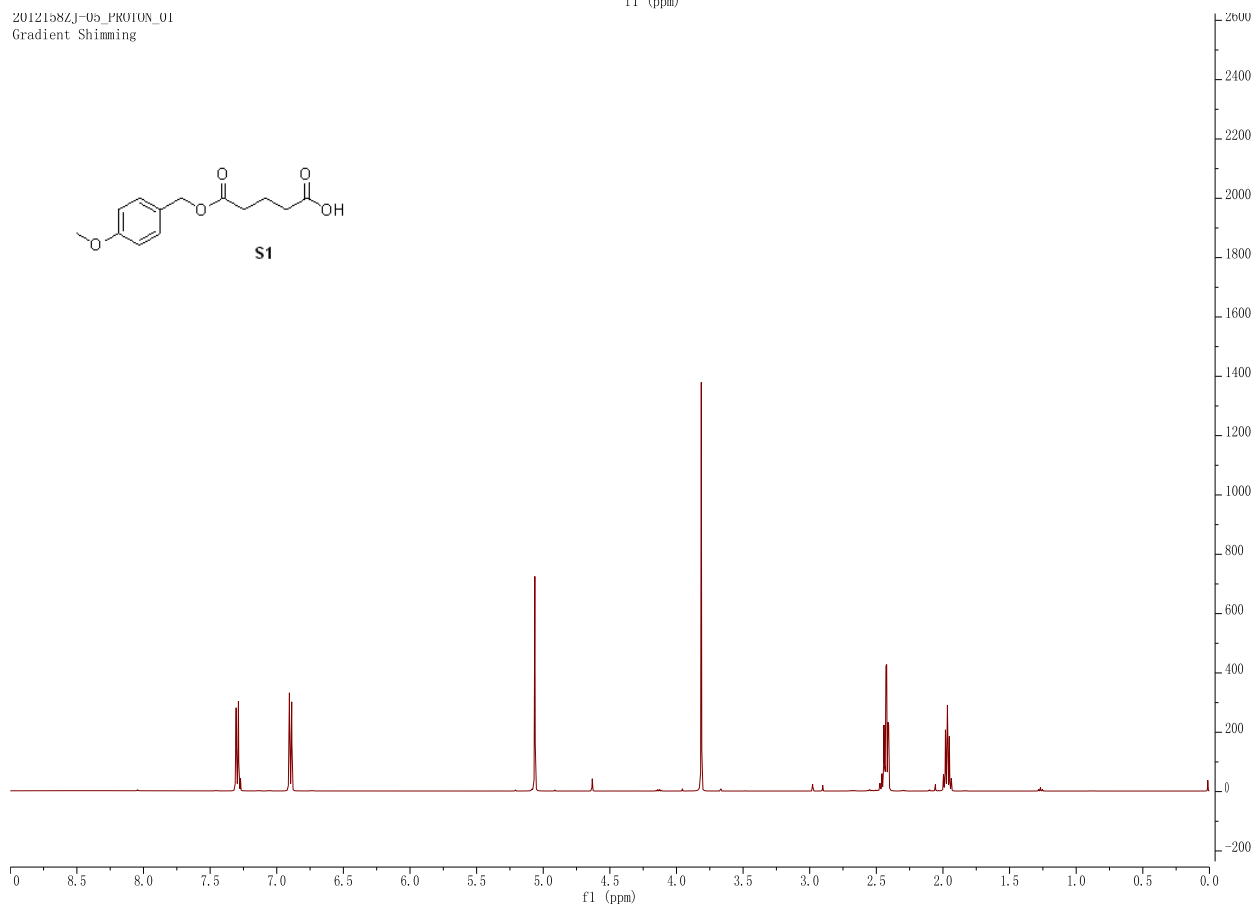

2012310yj-1X-47-H\_C\_pslabel\_01  
Gradient Shimming

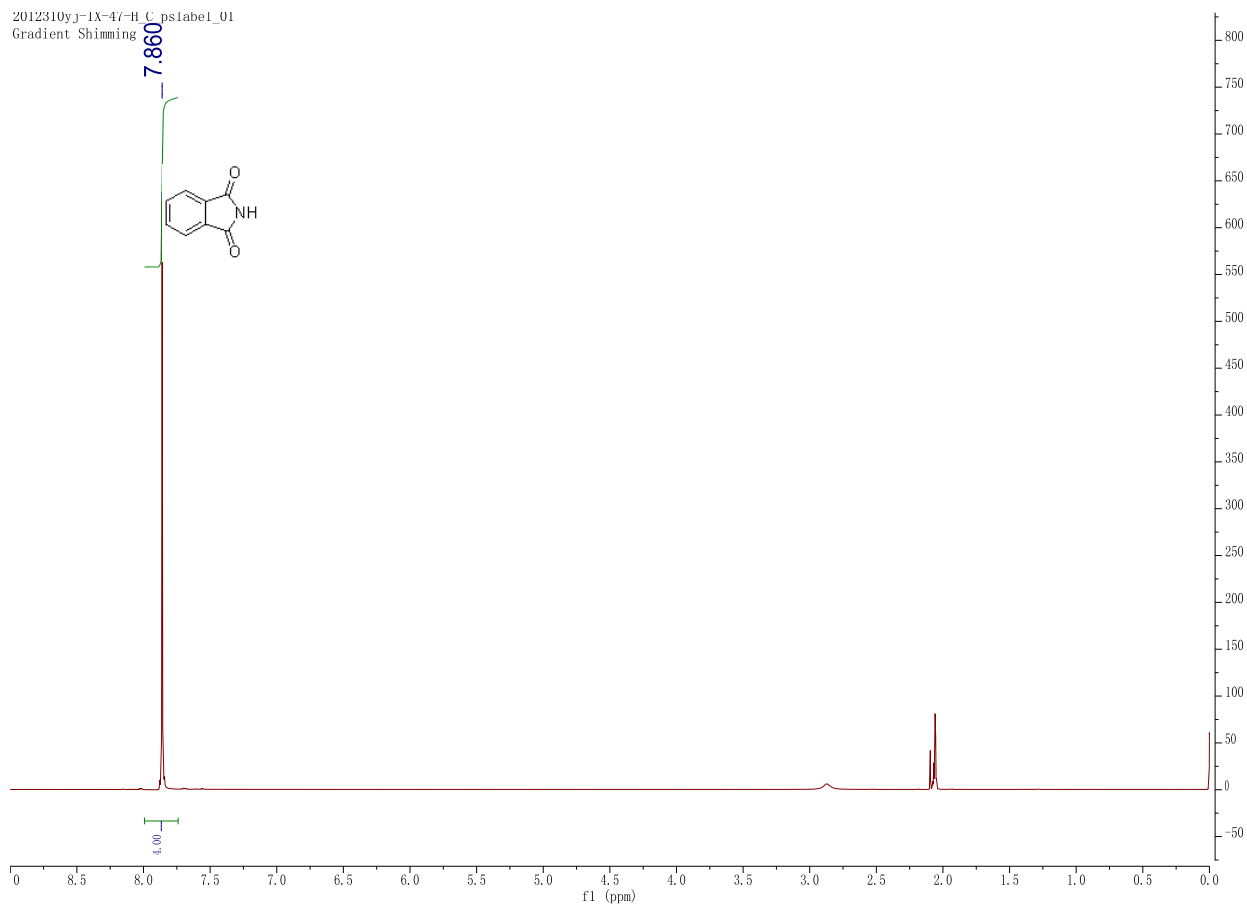

MestReNova  
2012310yj-1X-47-H\_C

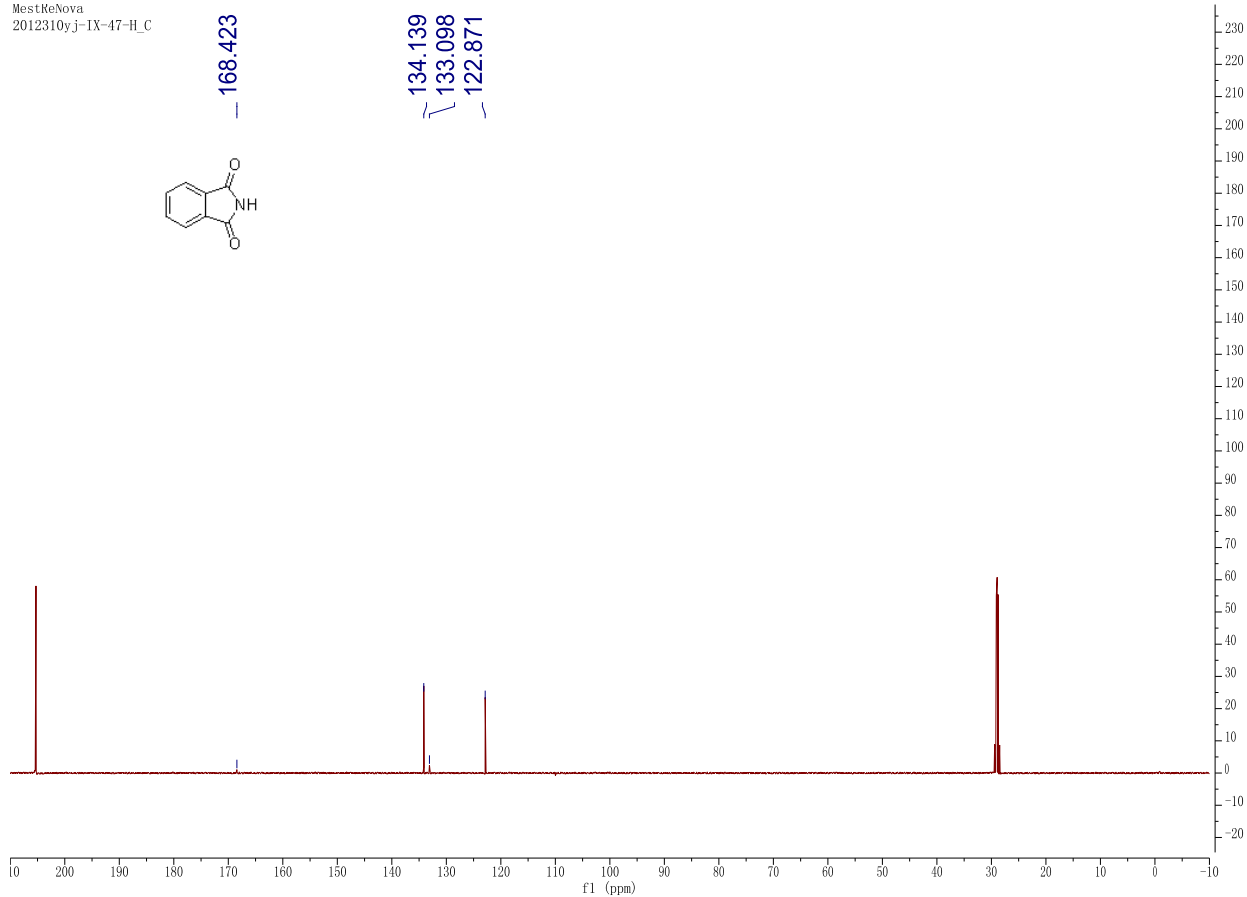

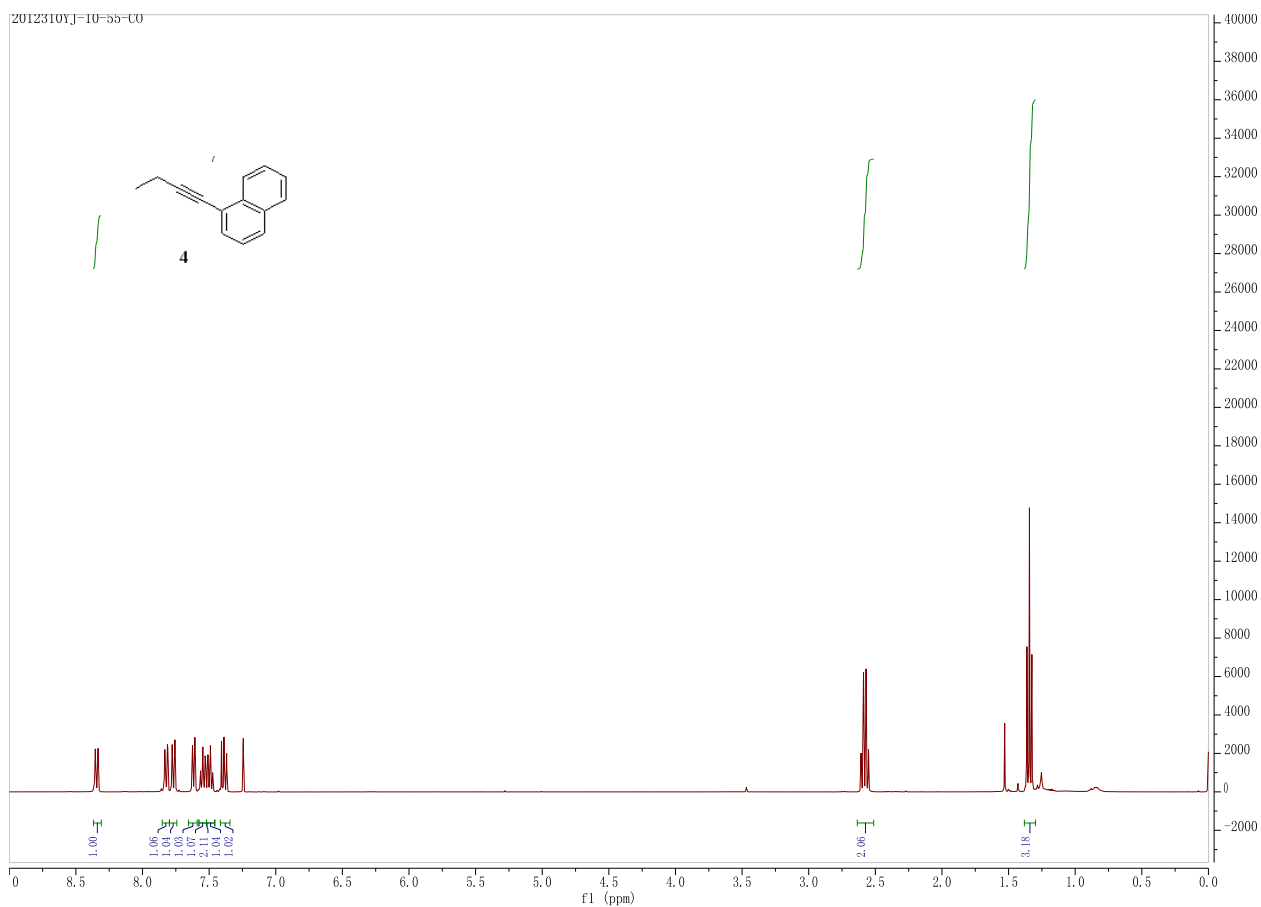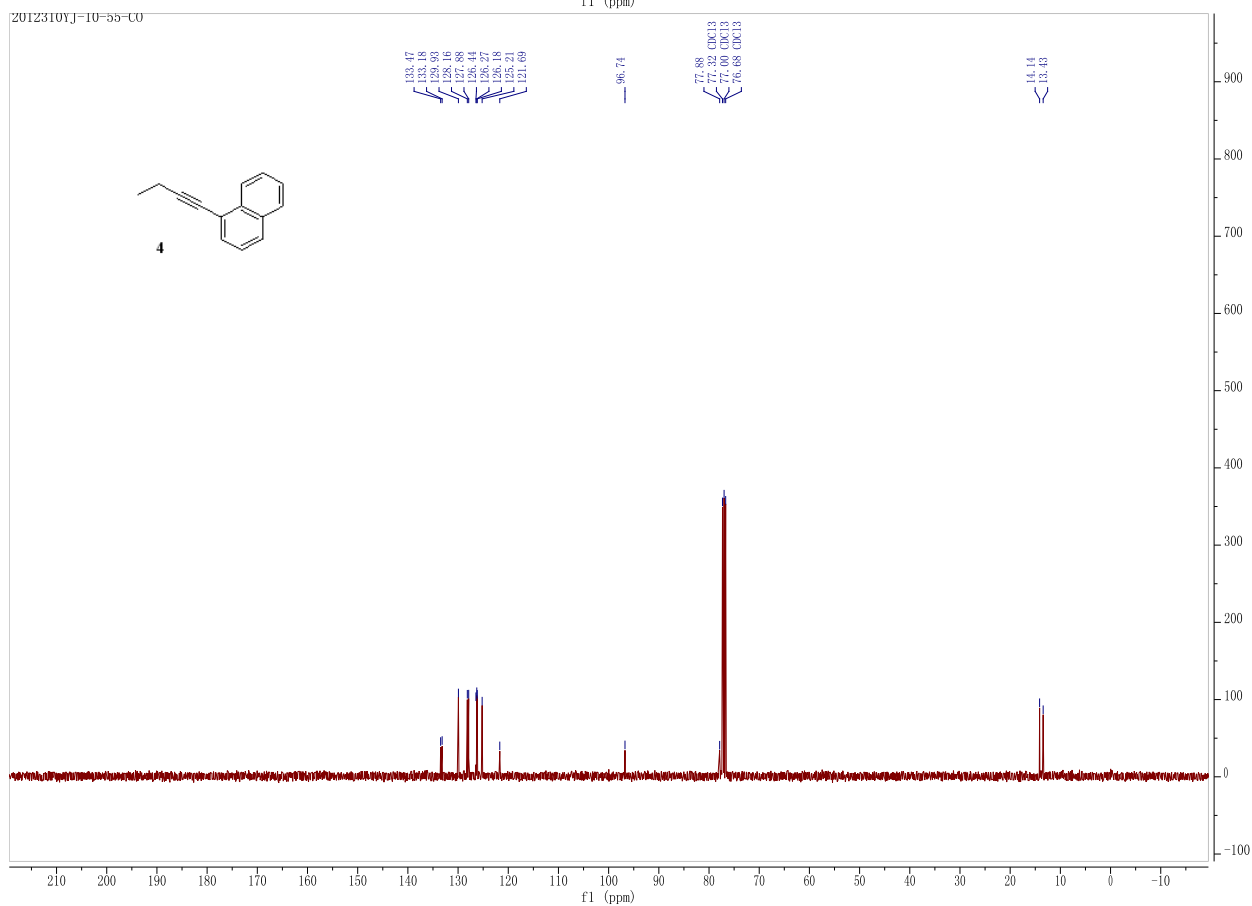

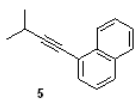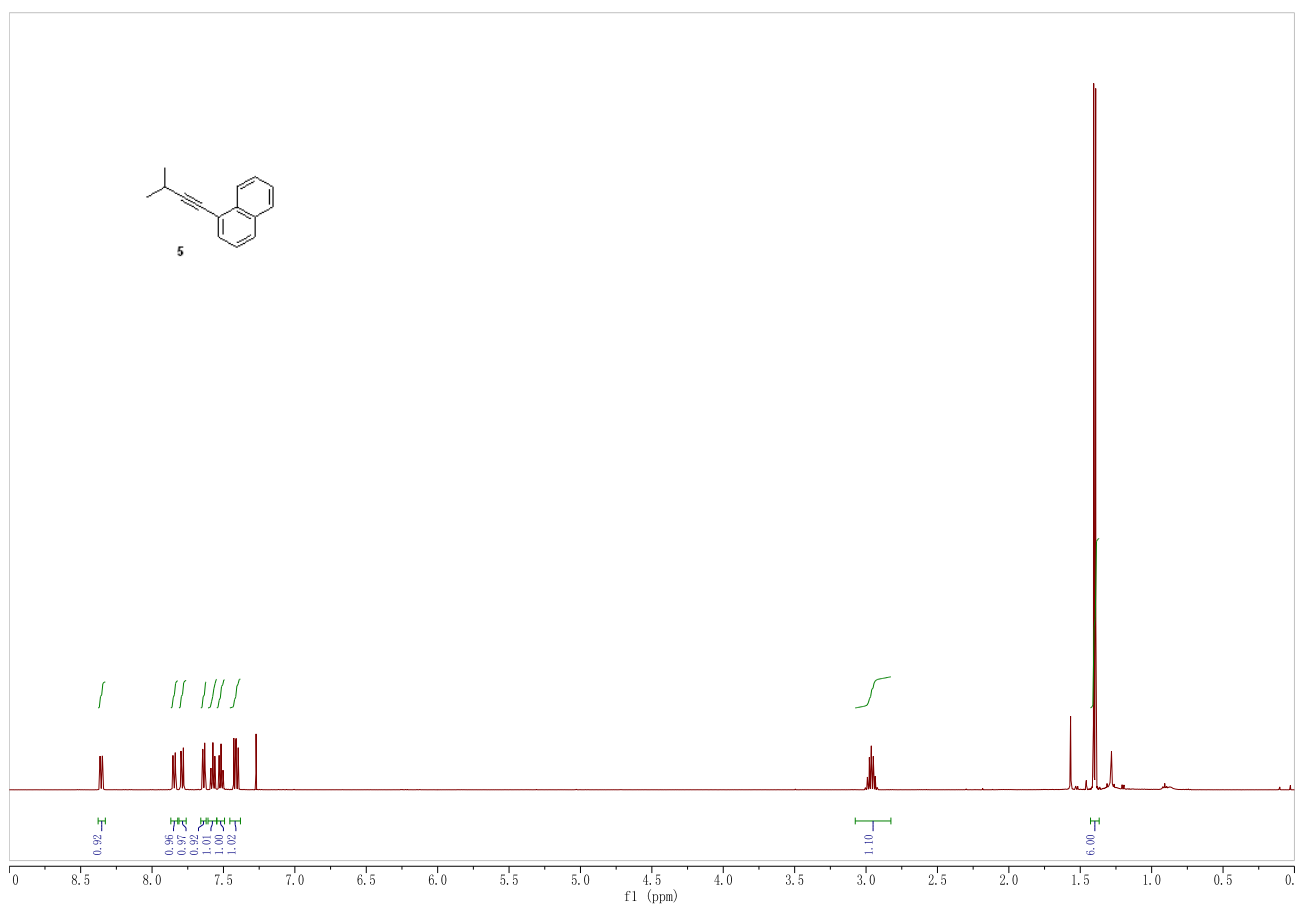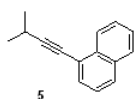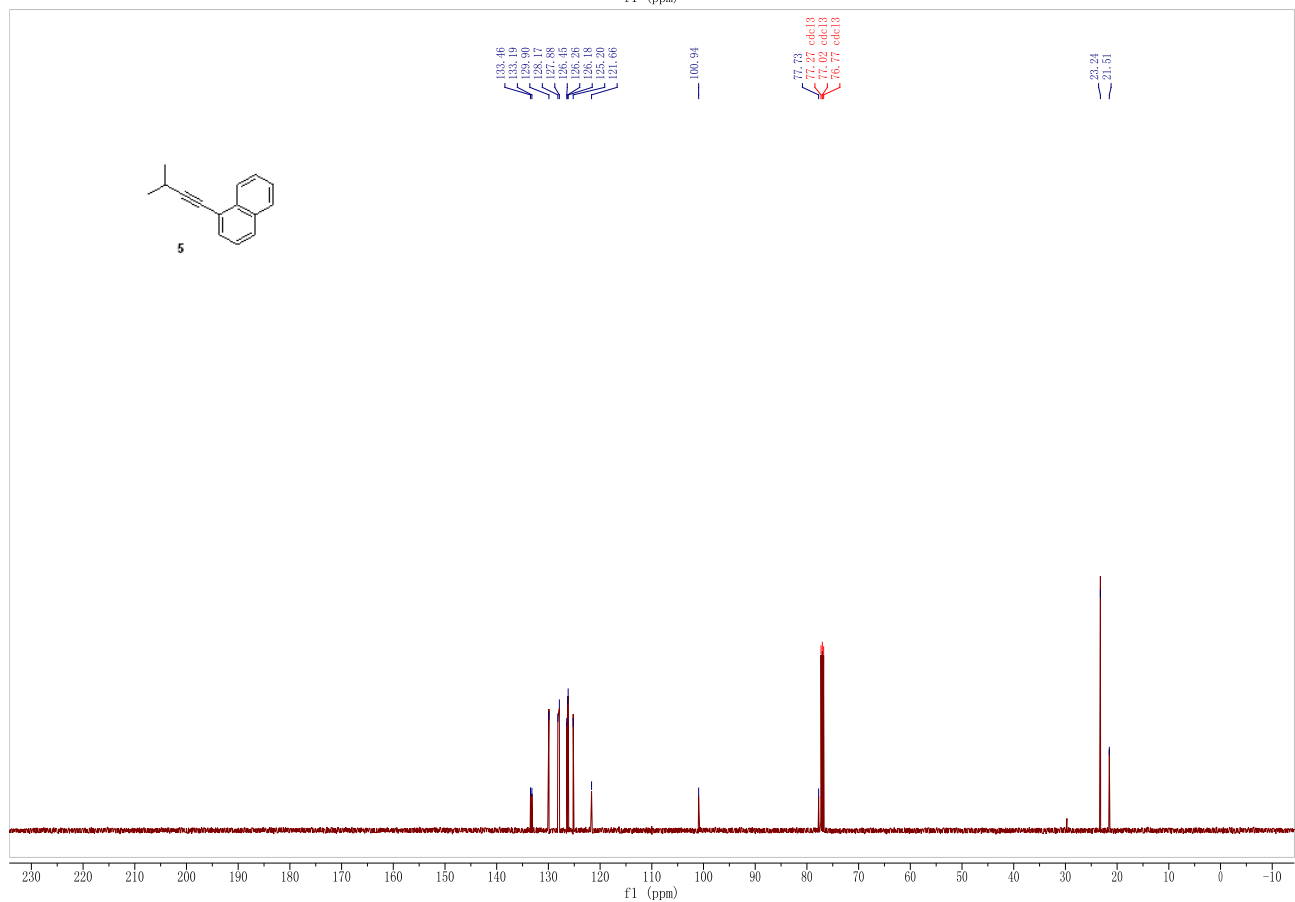

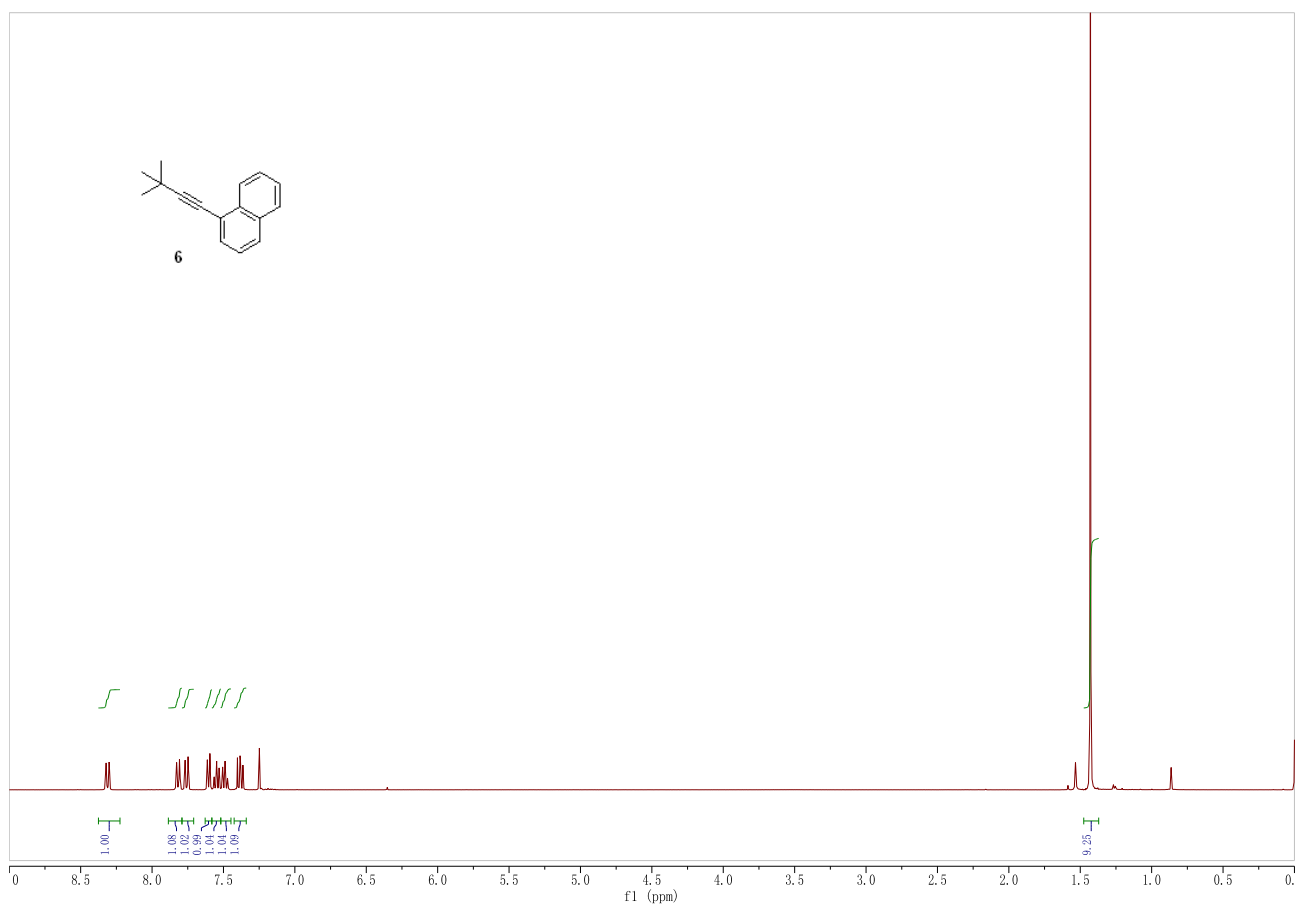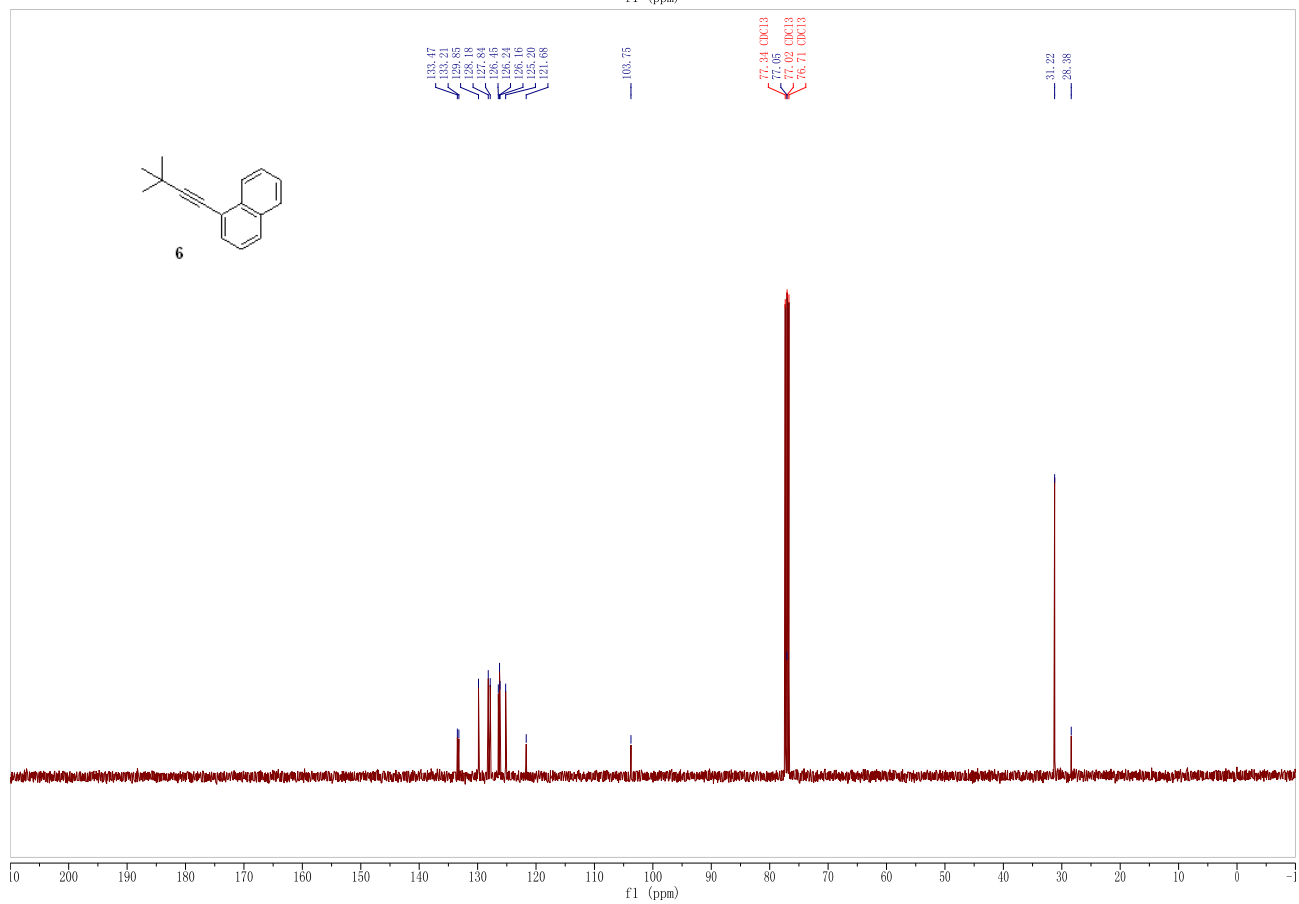



2012310YJ-10-40-H\_C\_PROTON\_01  
Gradient Shimming

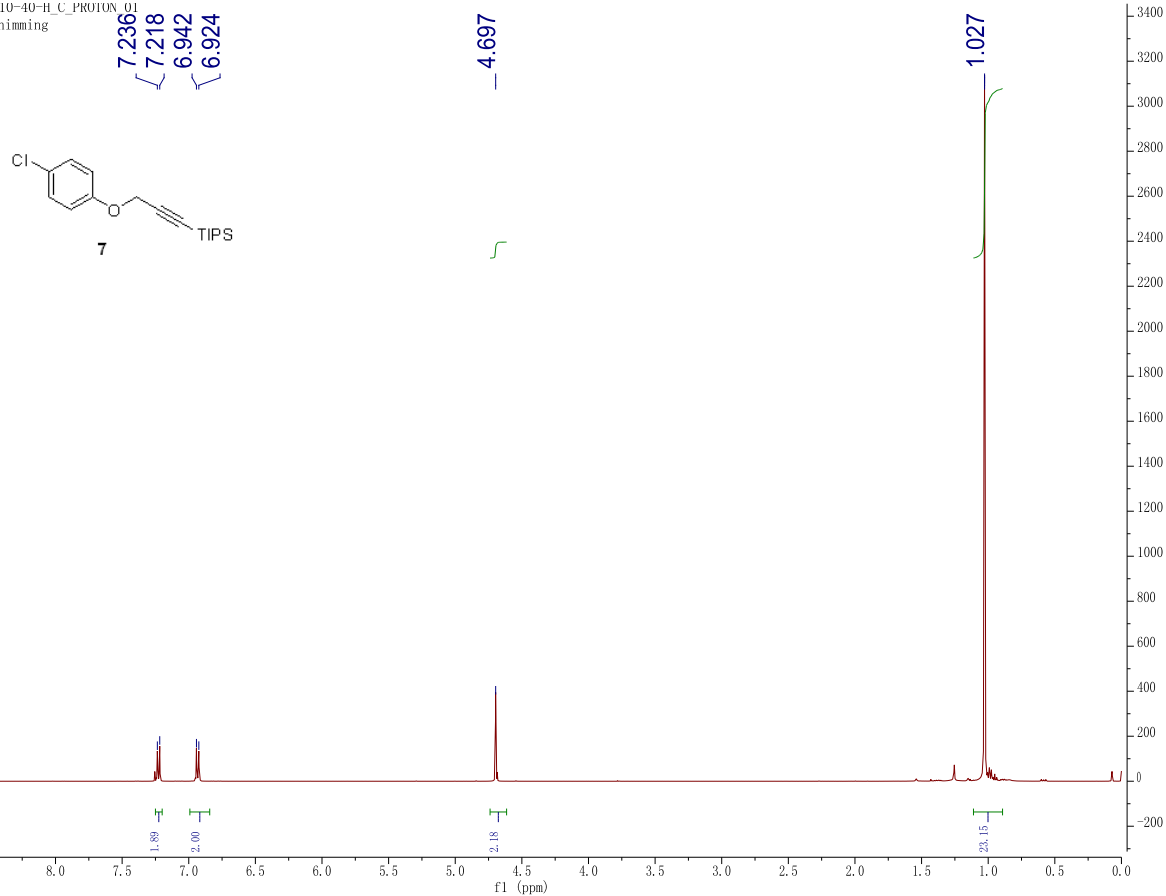

2012310YJ-10-40-H\_C\_CARBON\_01  
2012310YJ-10-40-H\_C

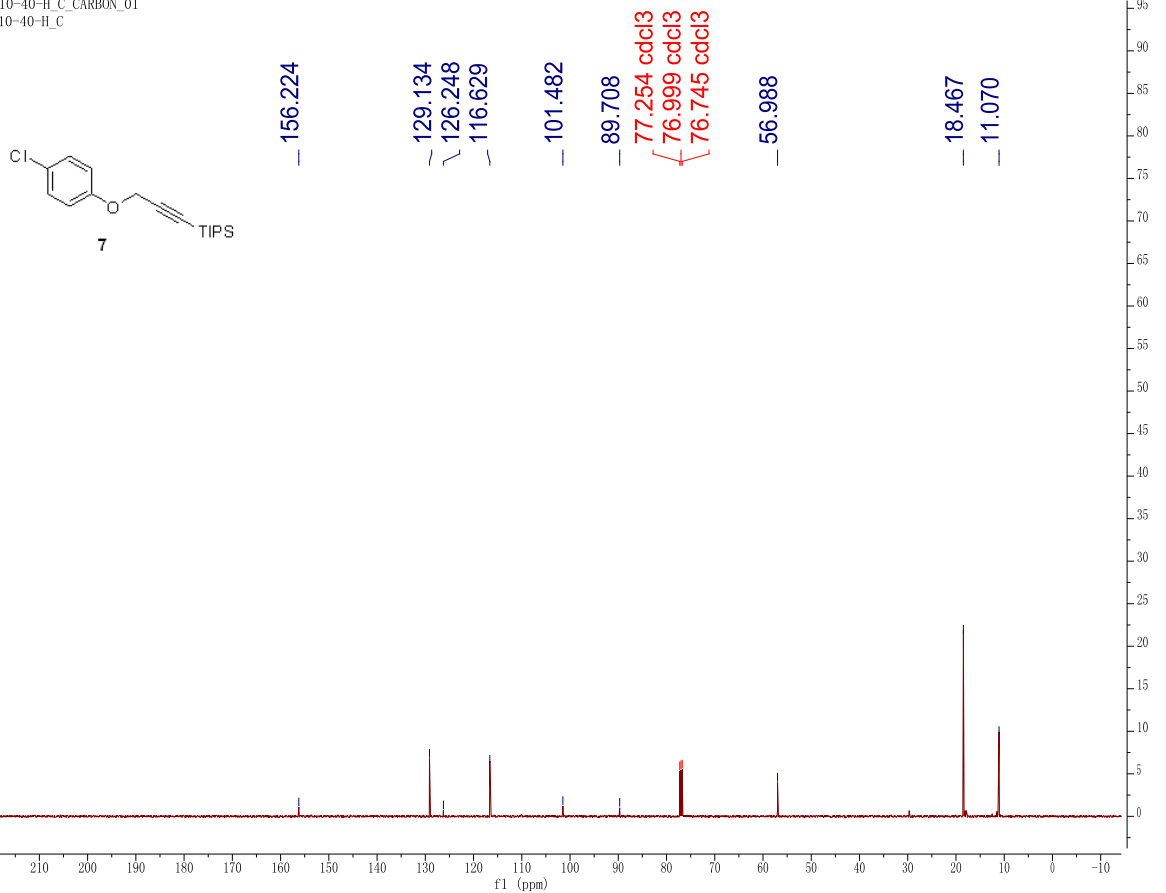

PROTON\_01  
Gradient Shimming

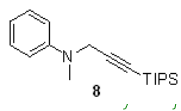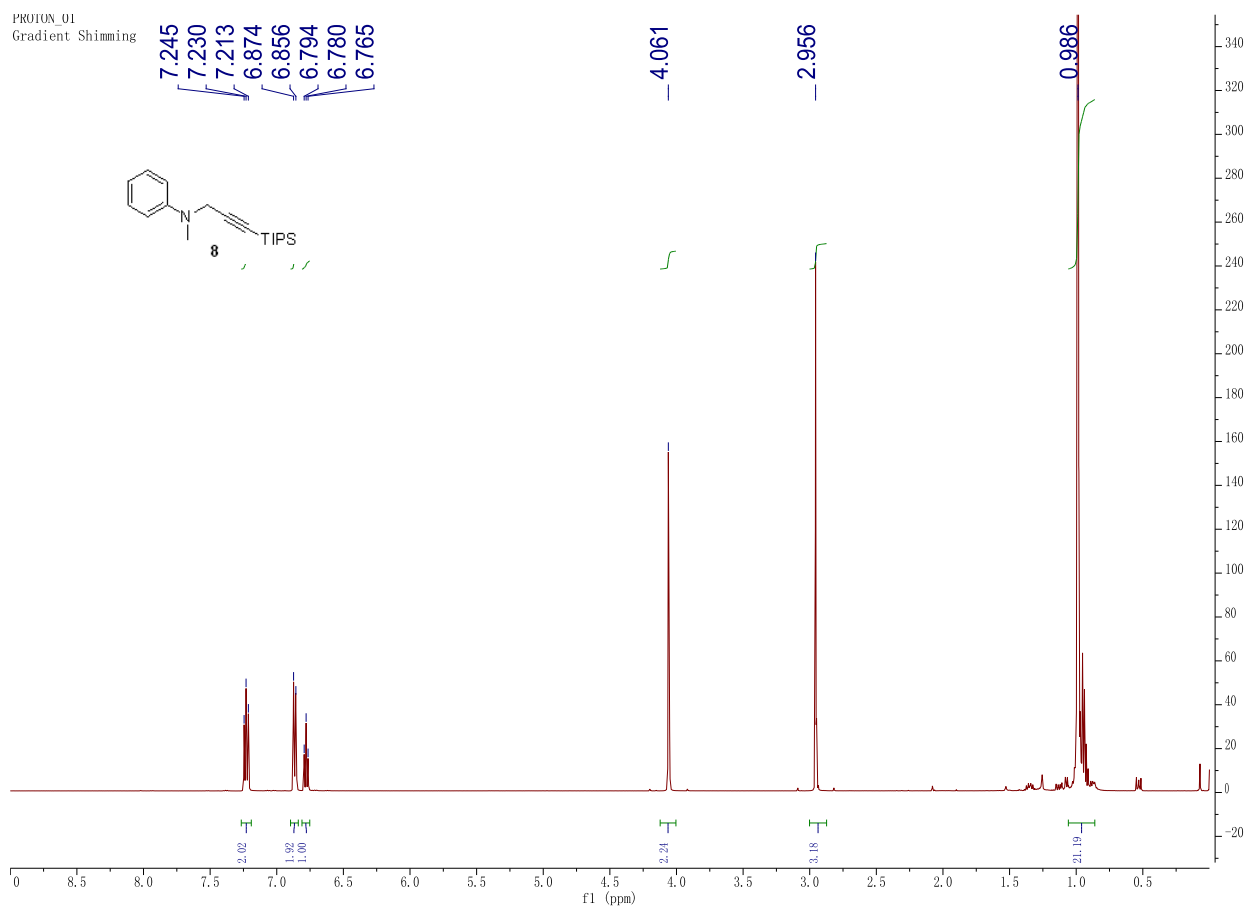

2012310YJ-IV-72-H\_C CARBON\_01  
2012310YJ-IV-72-H\_C

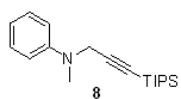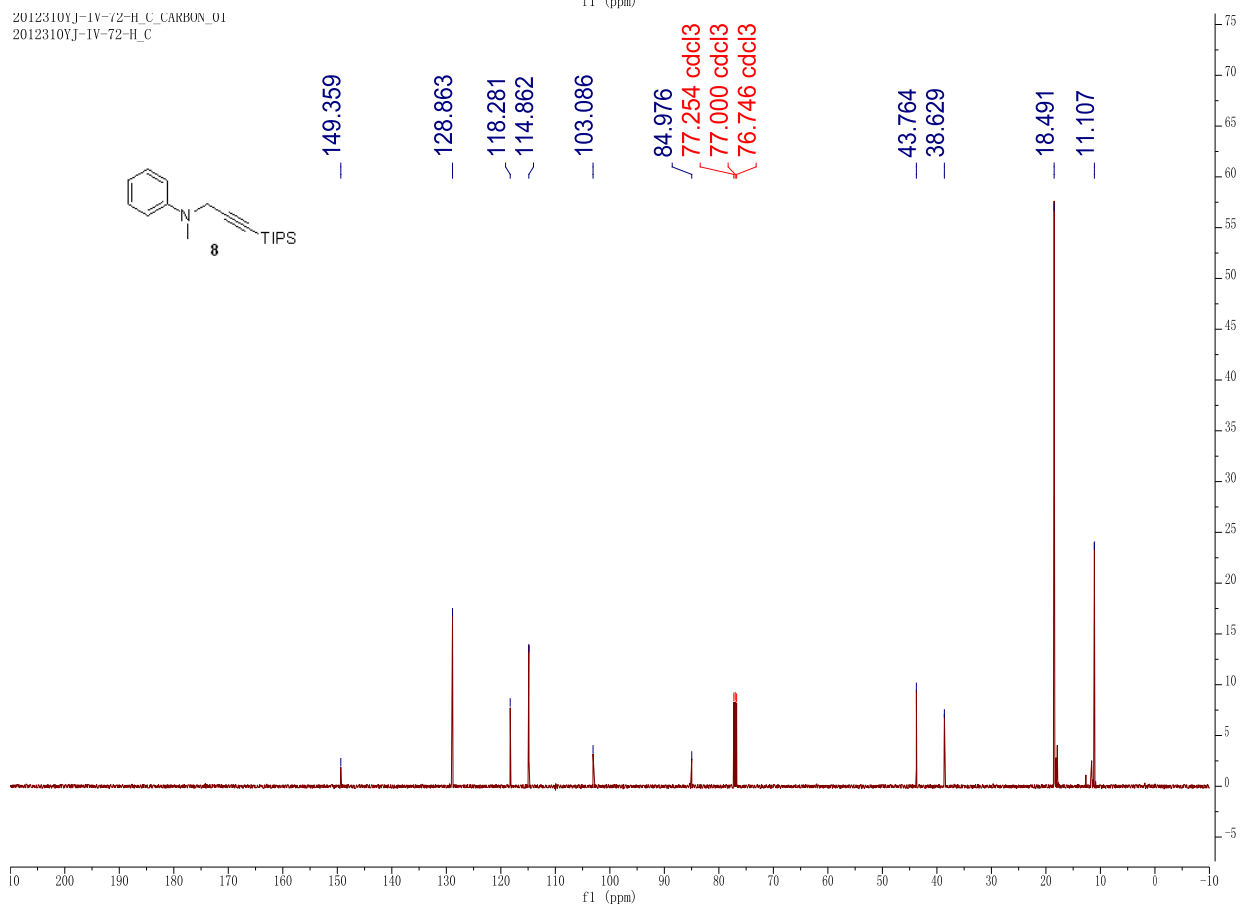

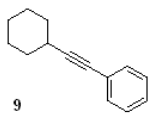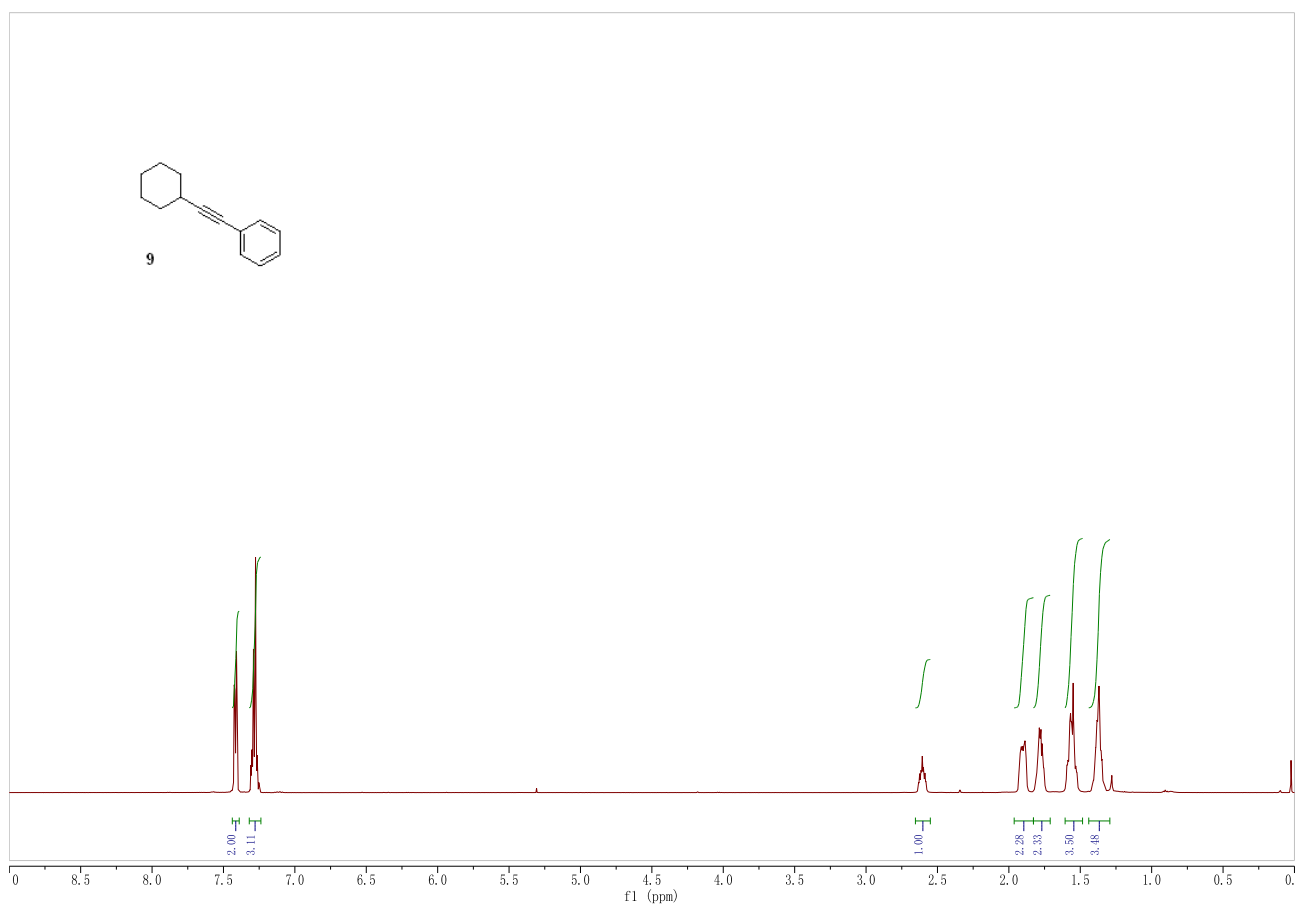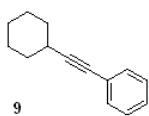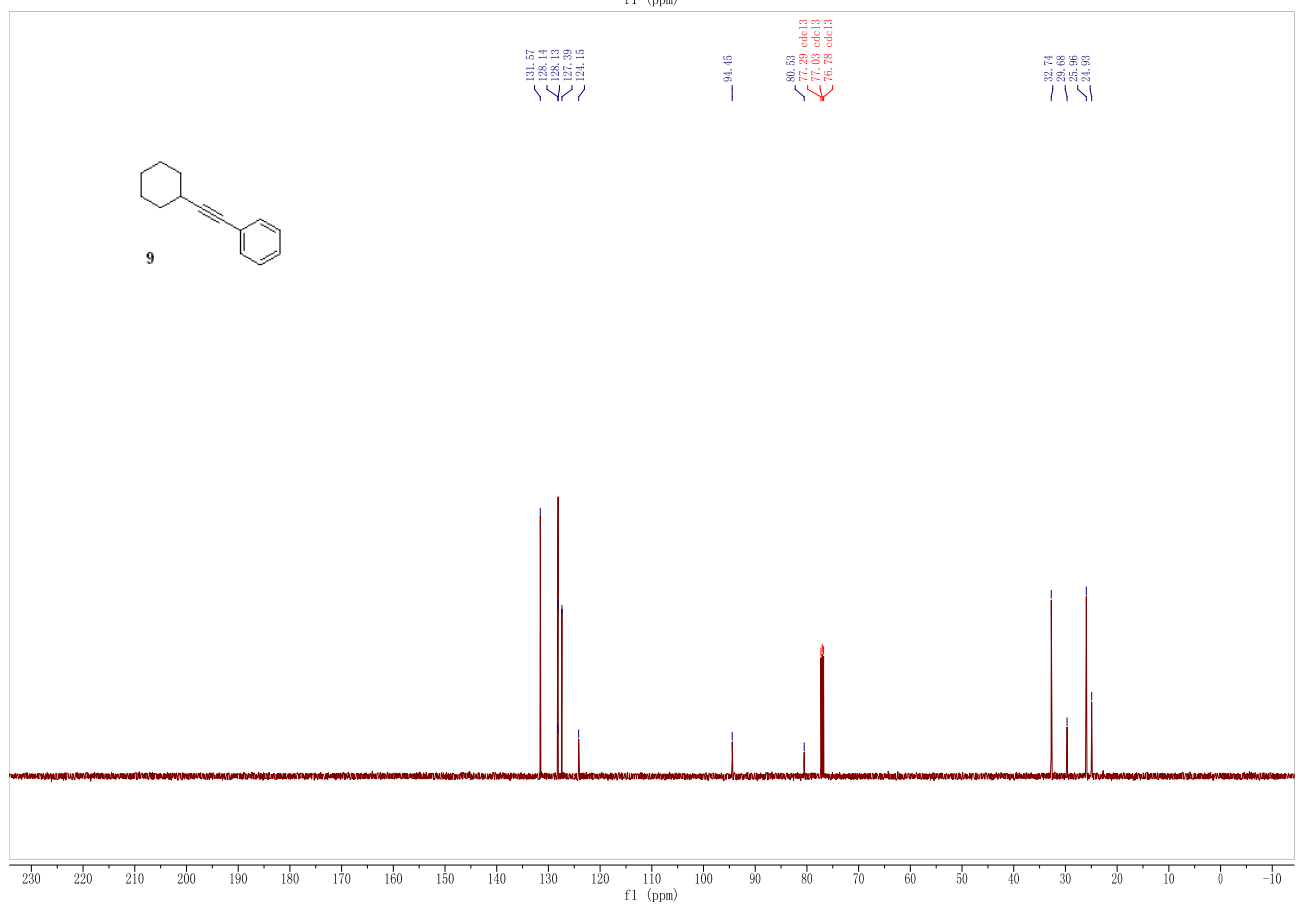

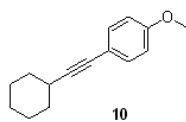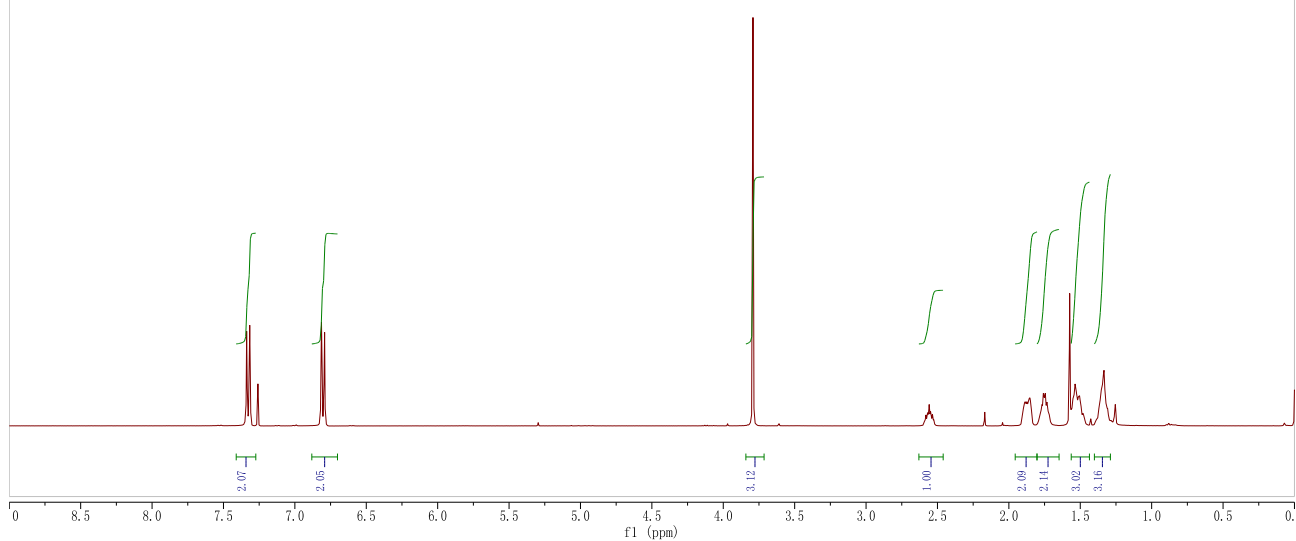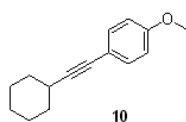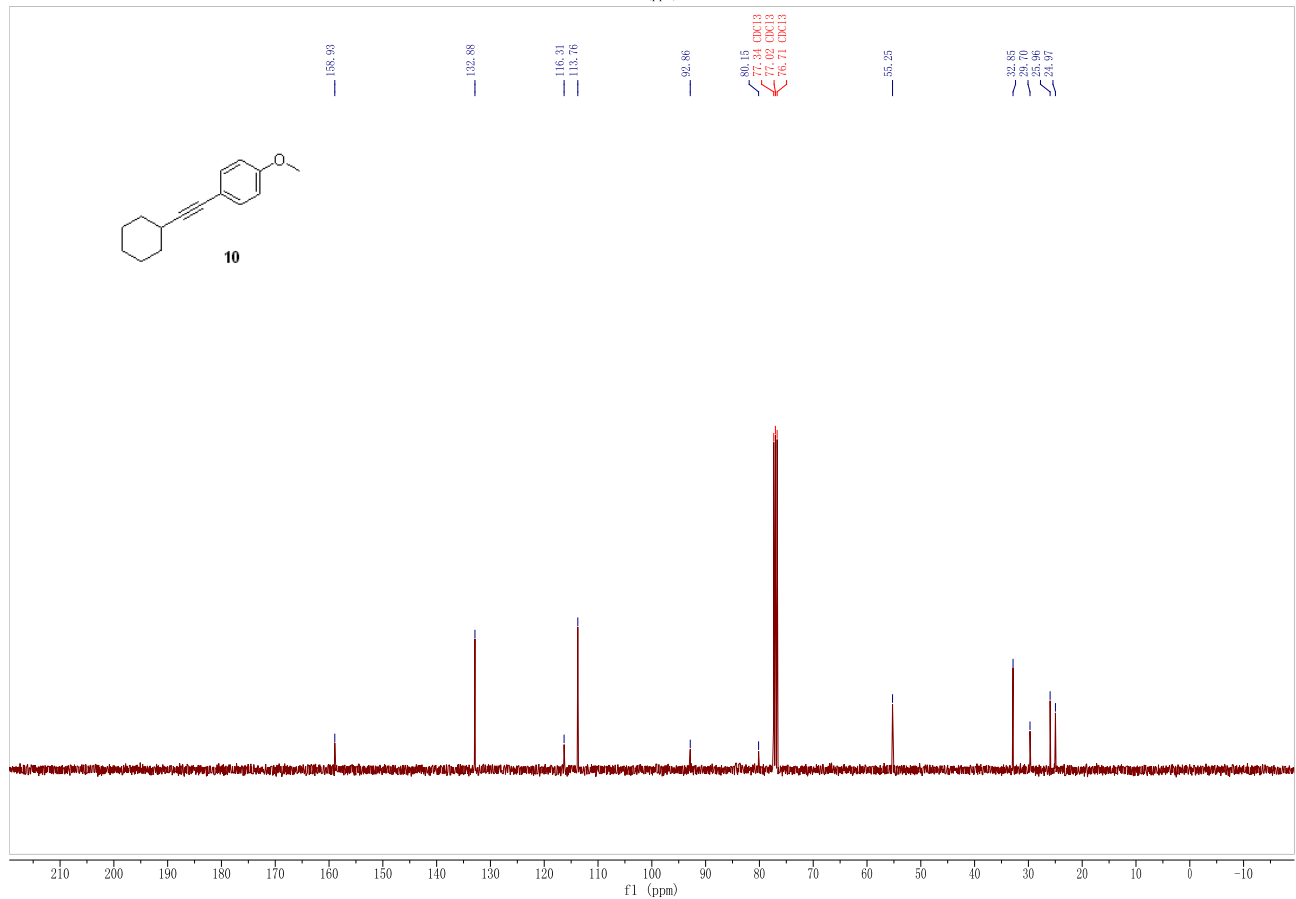

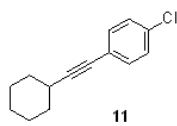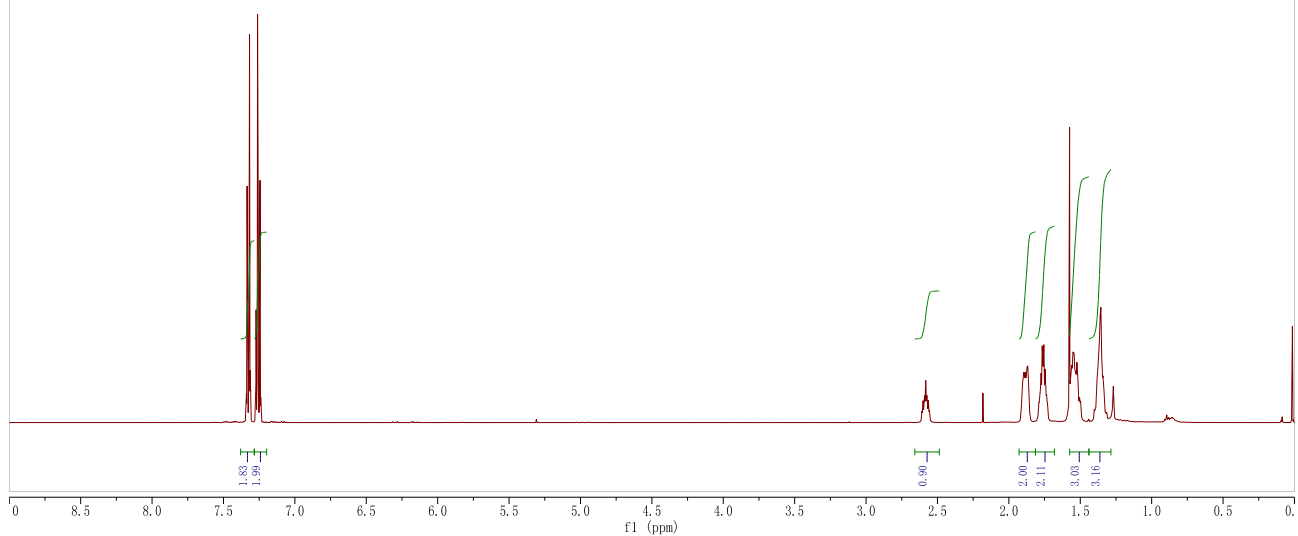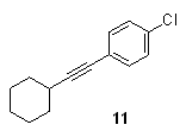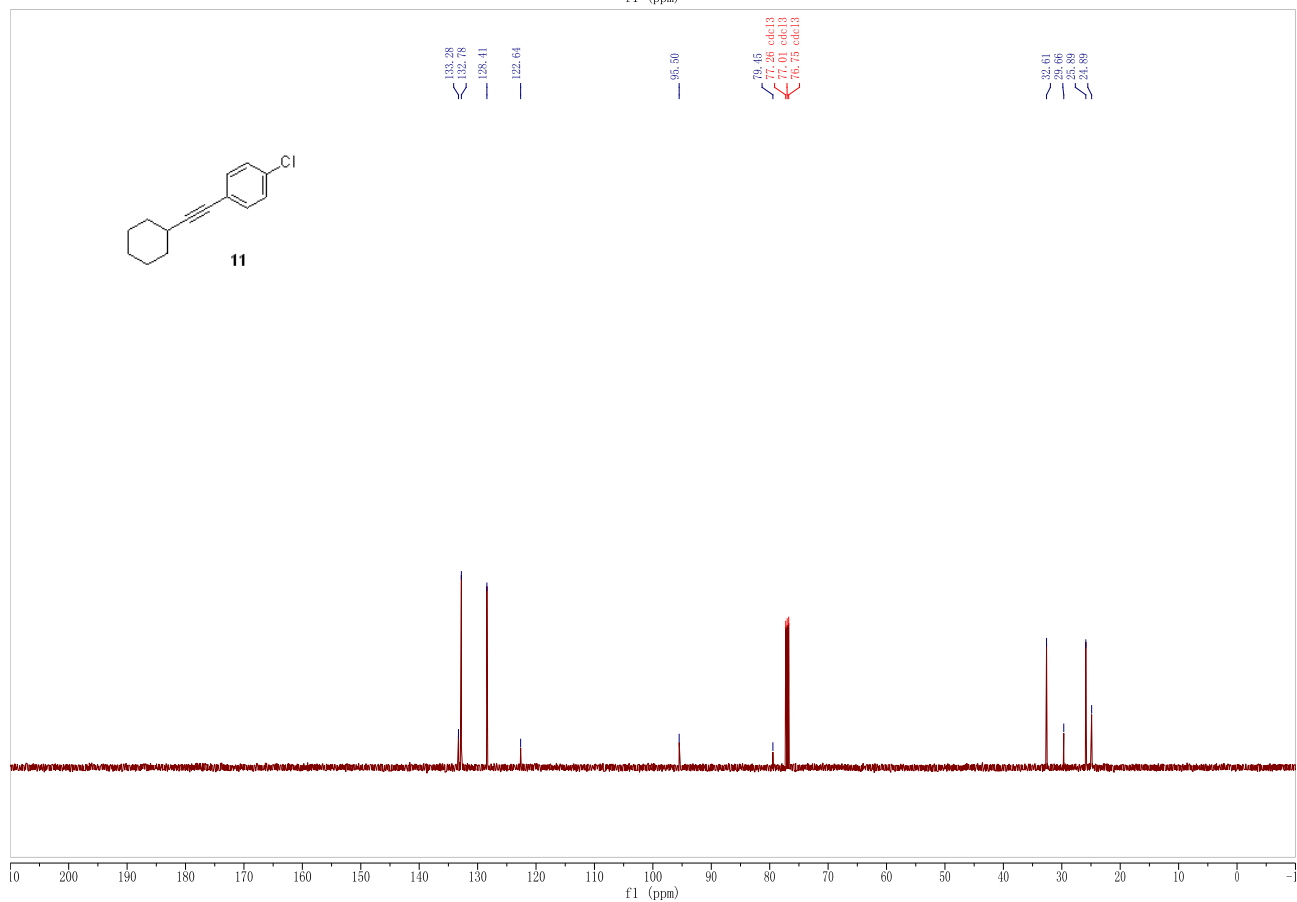

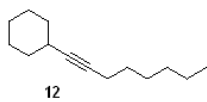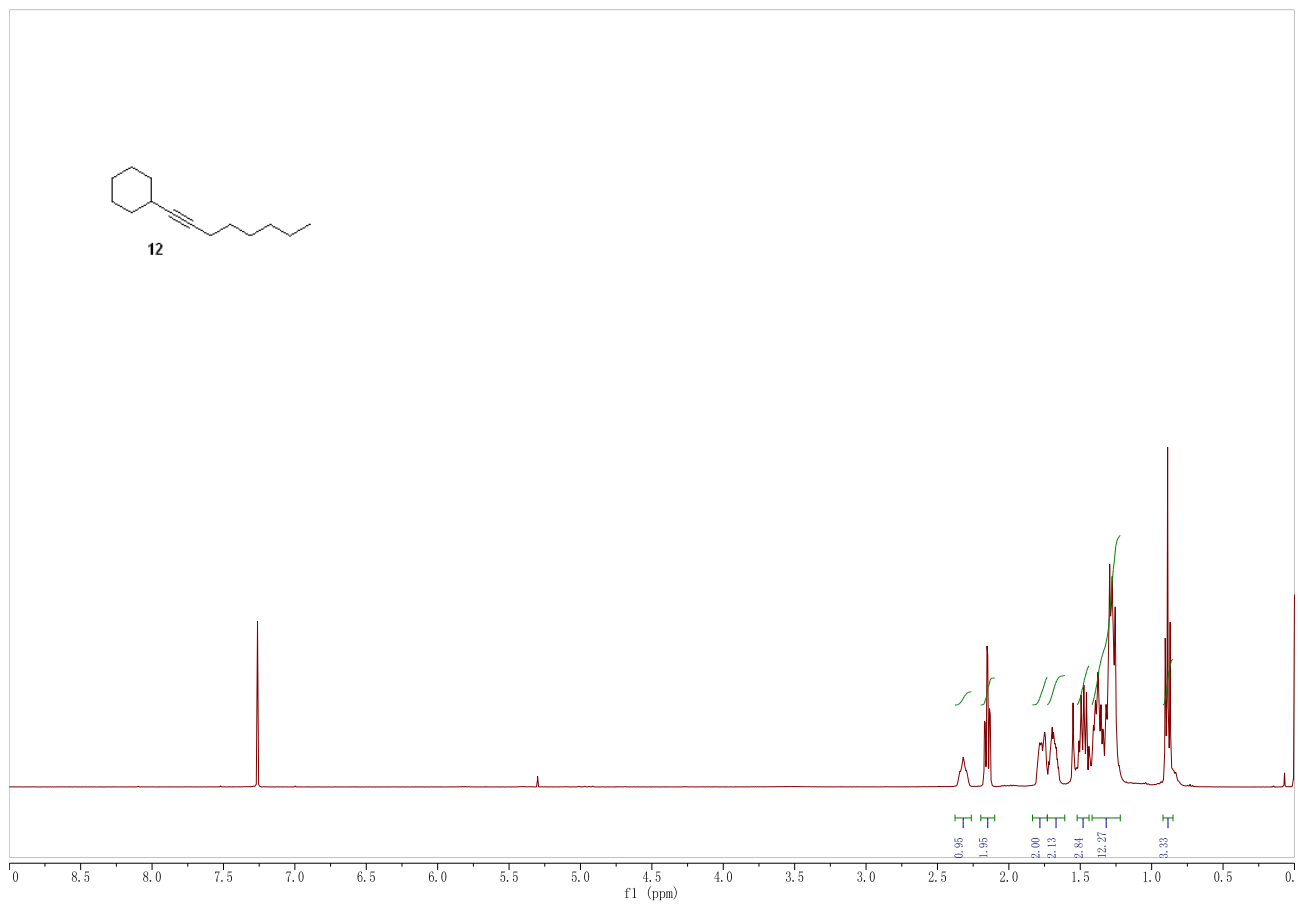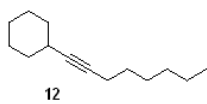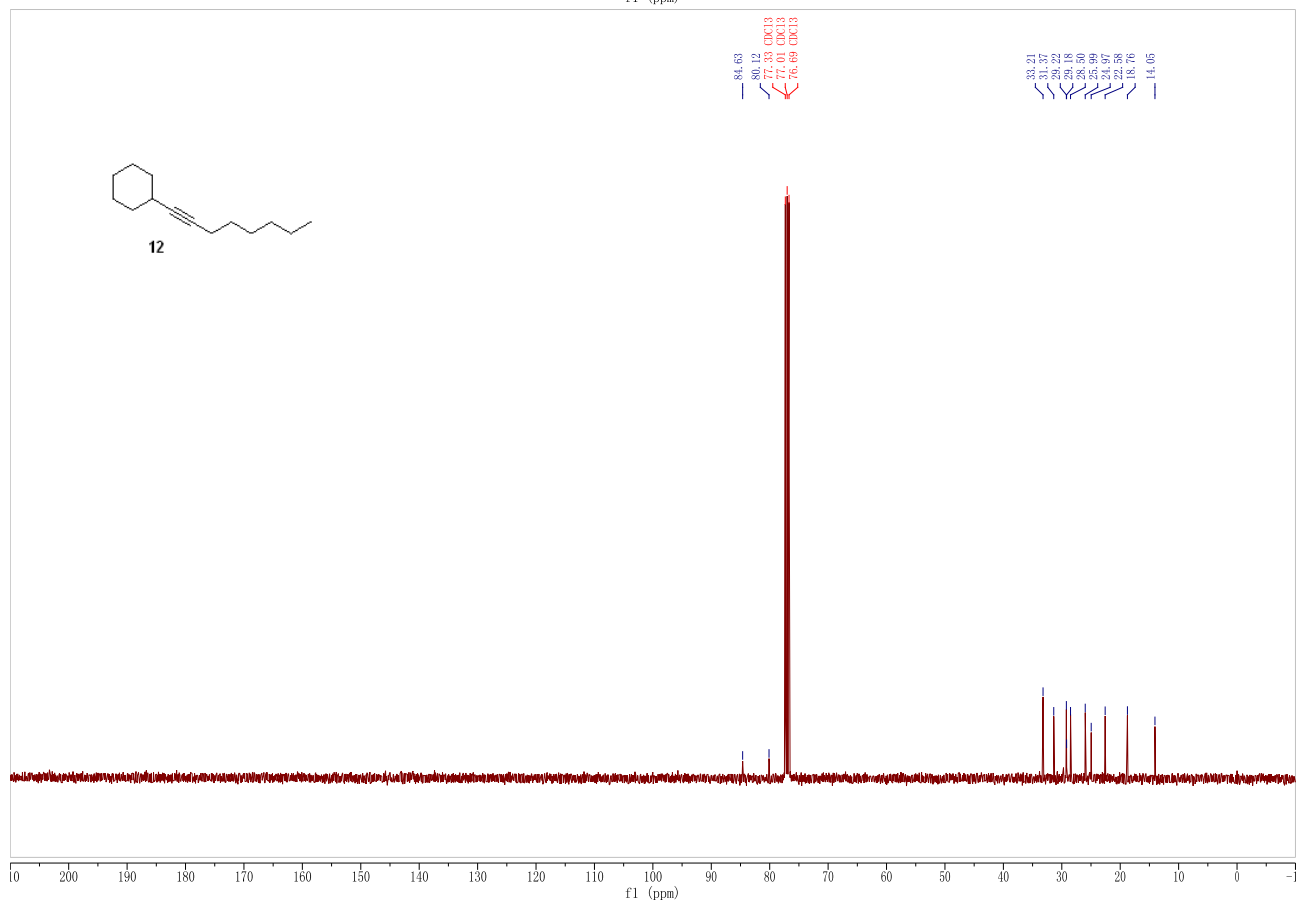

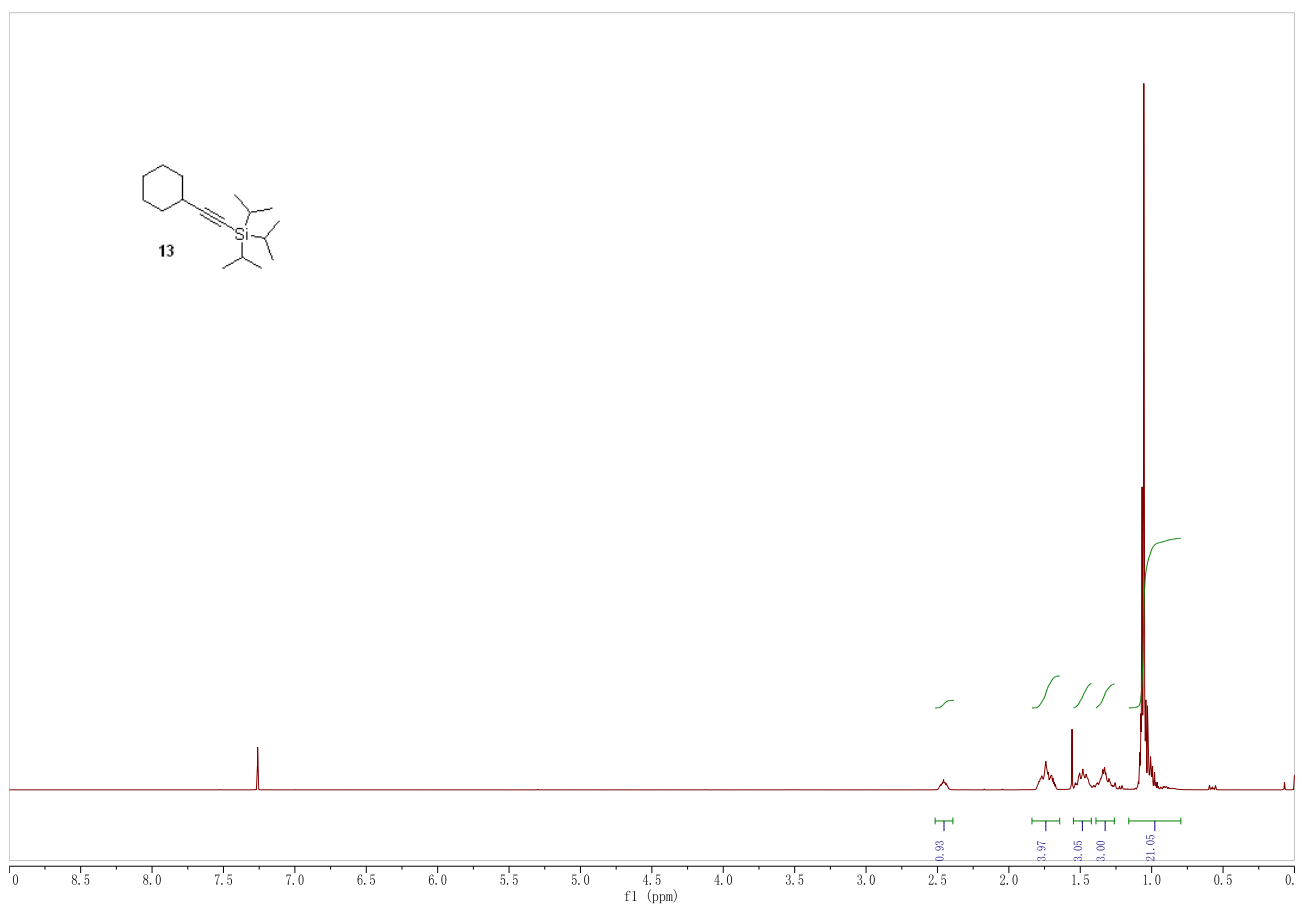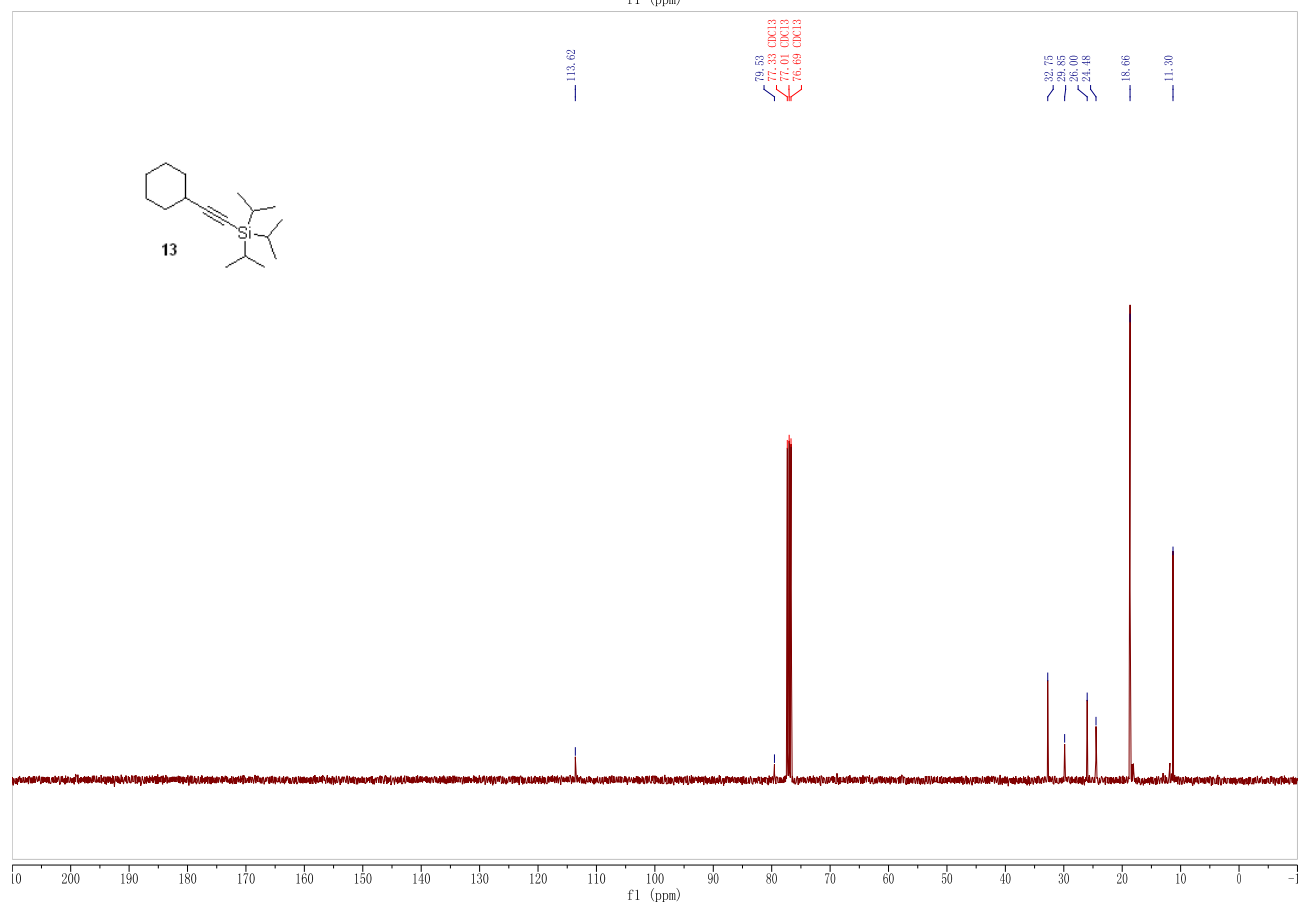

2012310YJ-VIIII-4-CO, 10. F1d

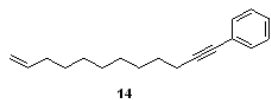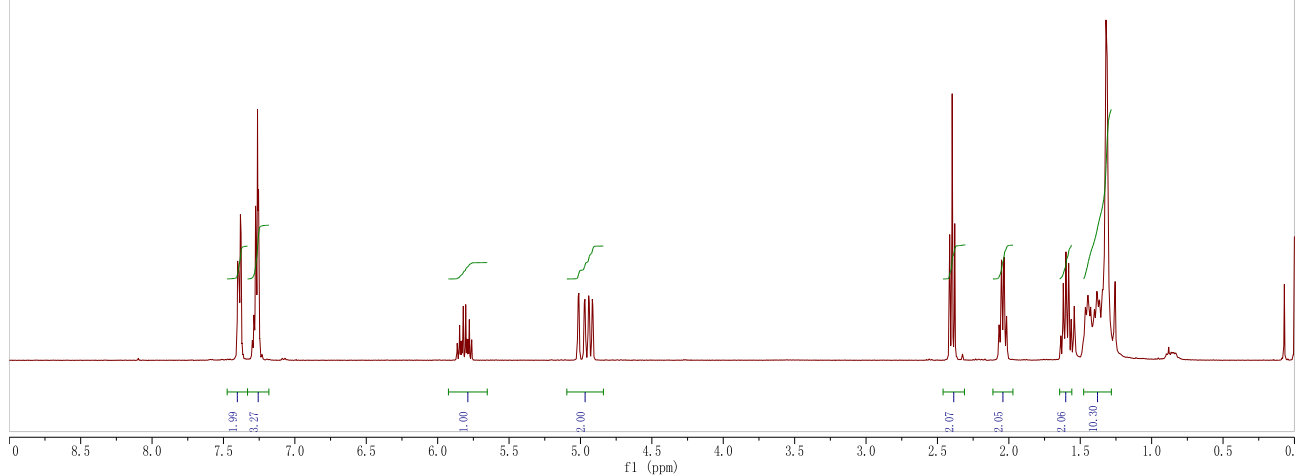

2012310YJ-IX-004-CO CARBON\_01  
2012310YJ-IX-004-CO

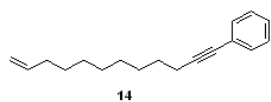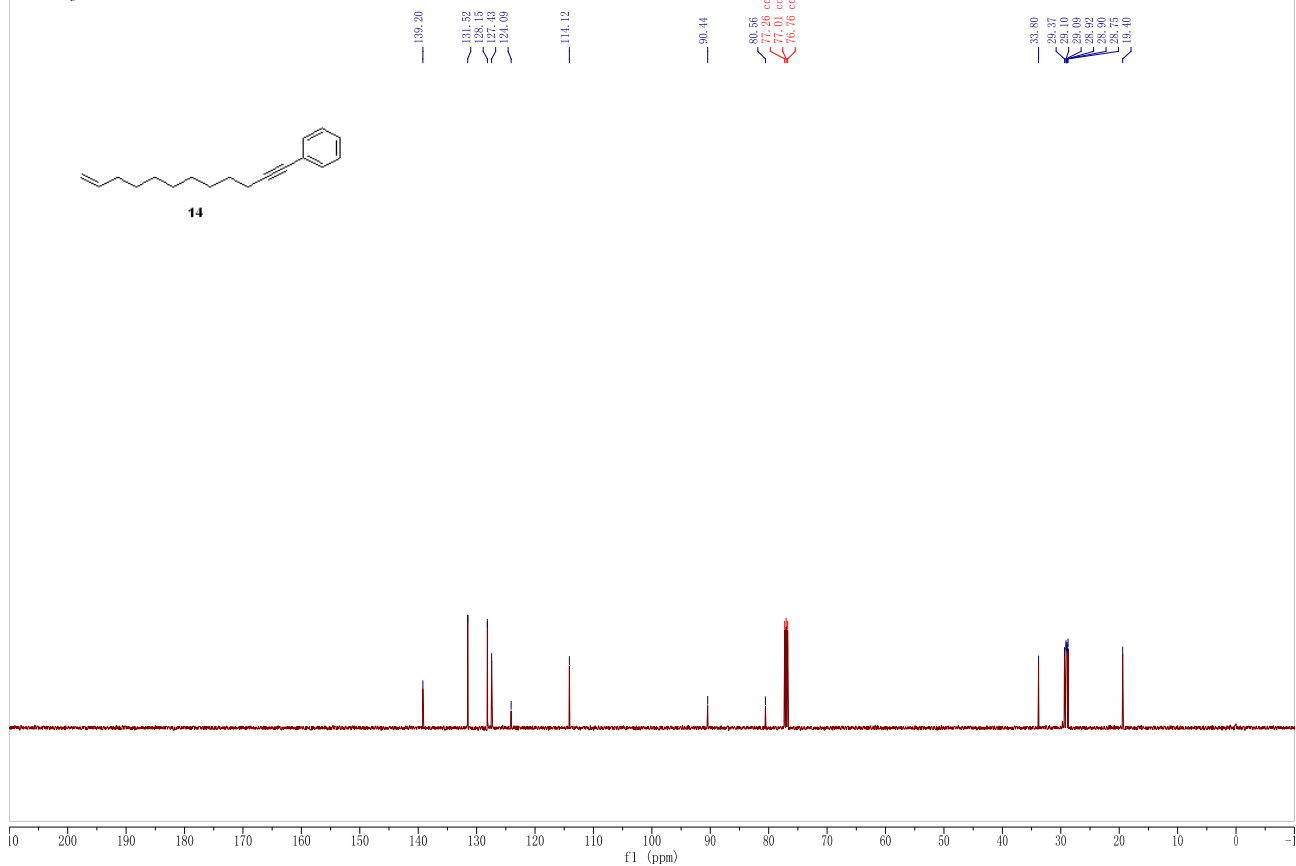



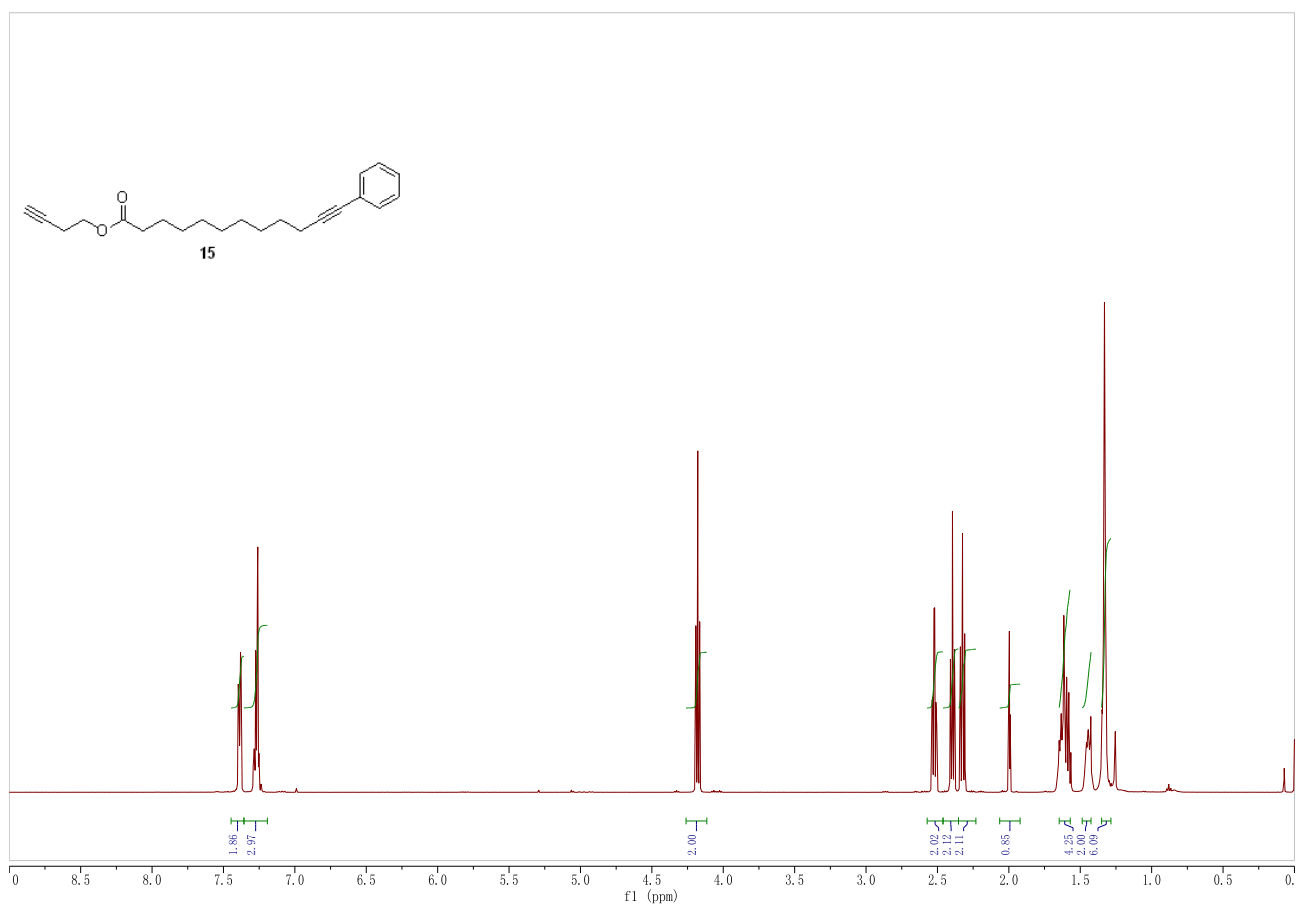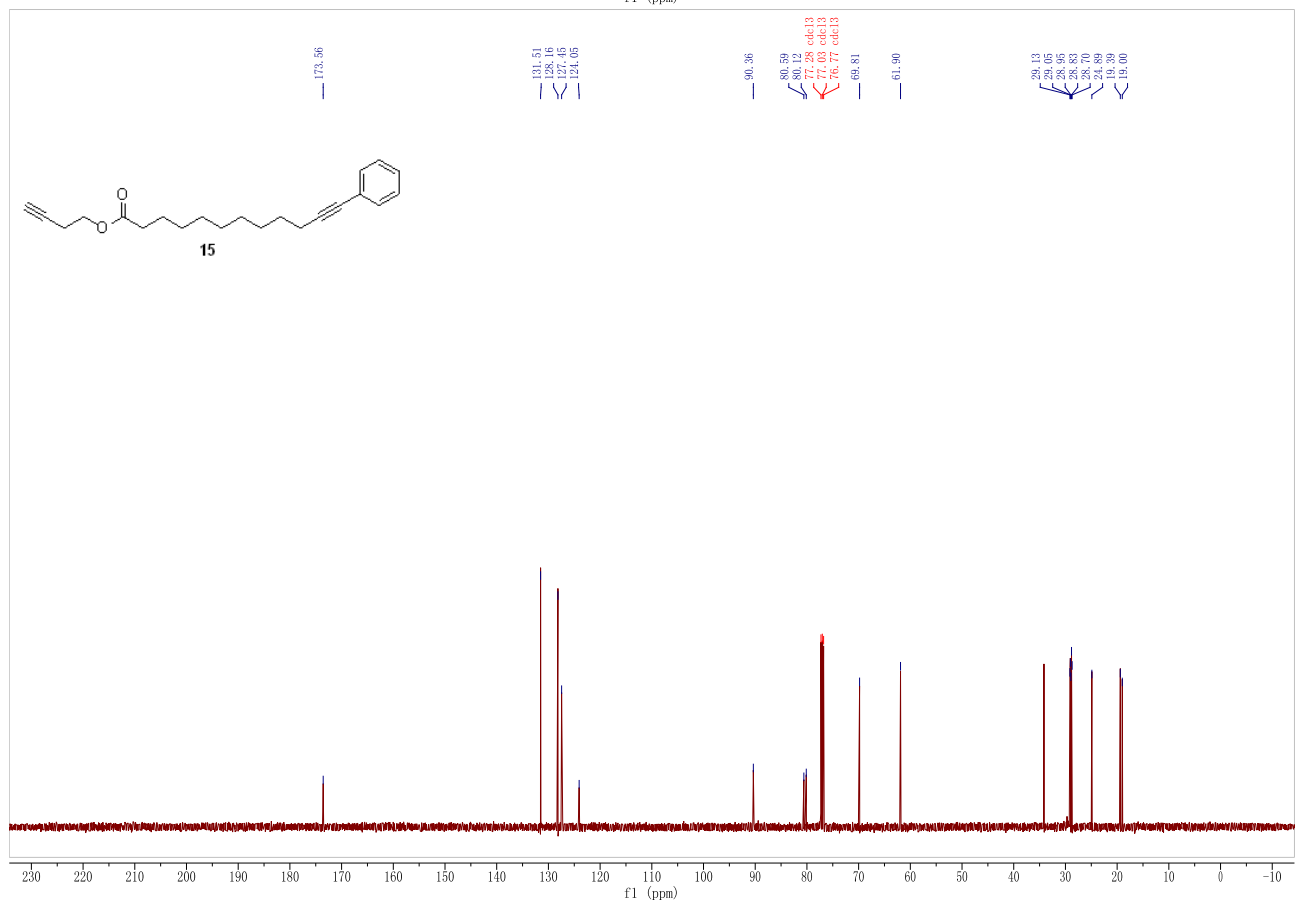

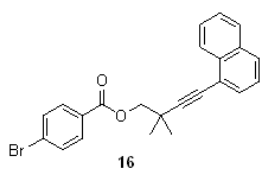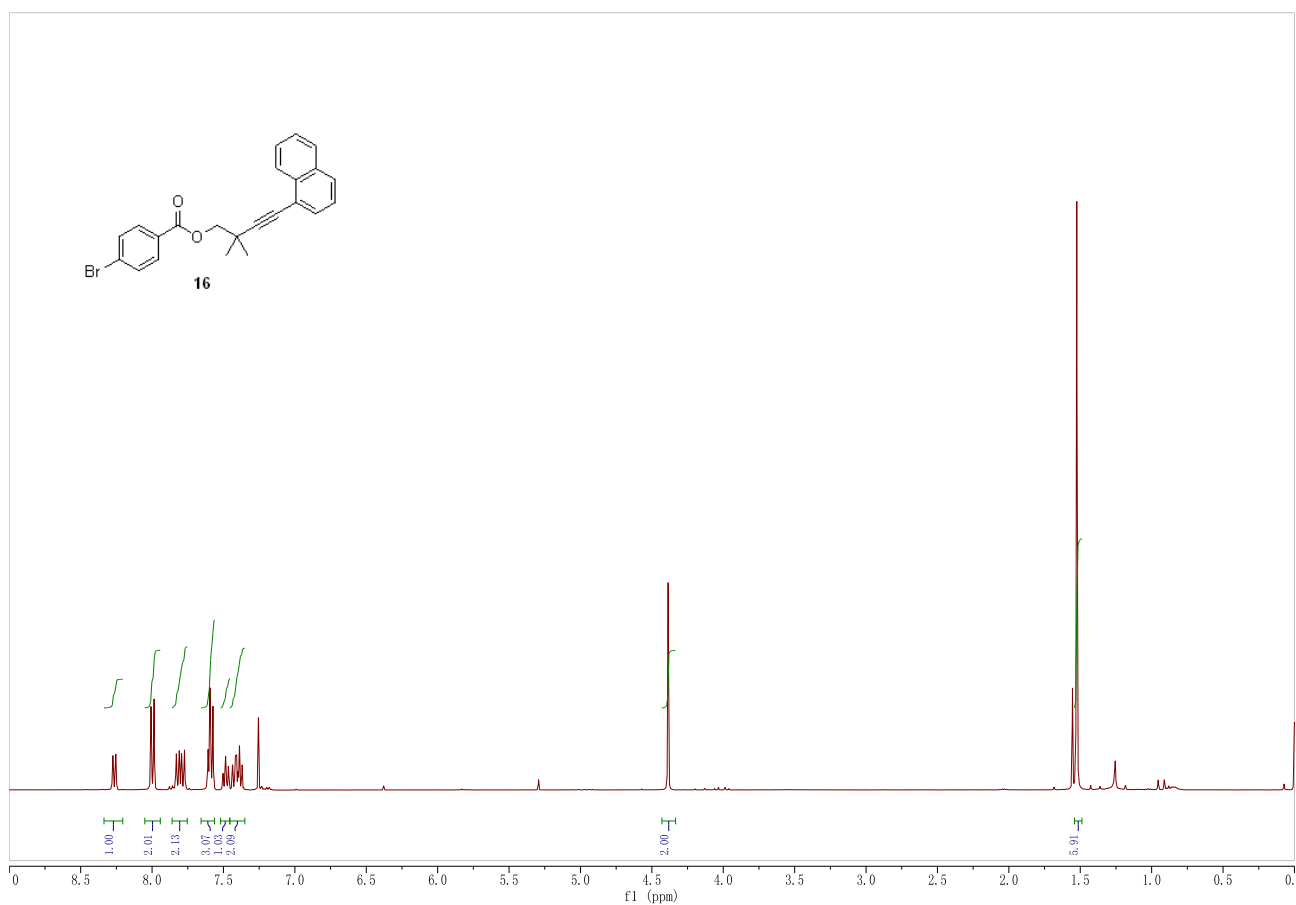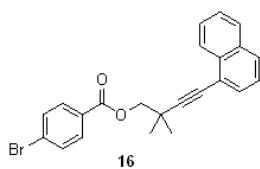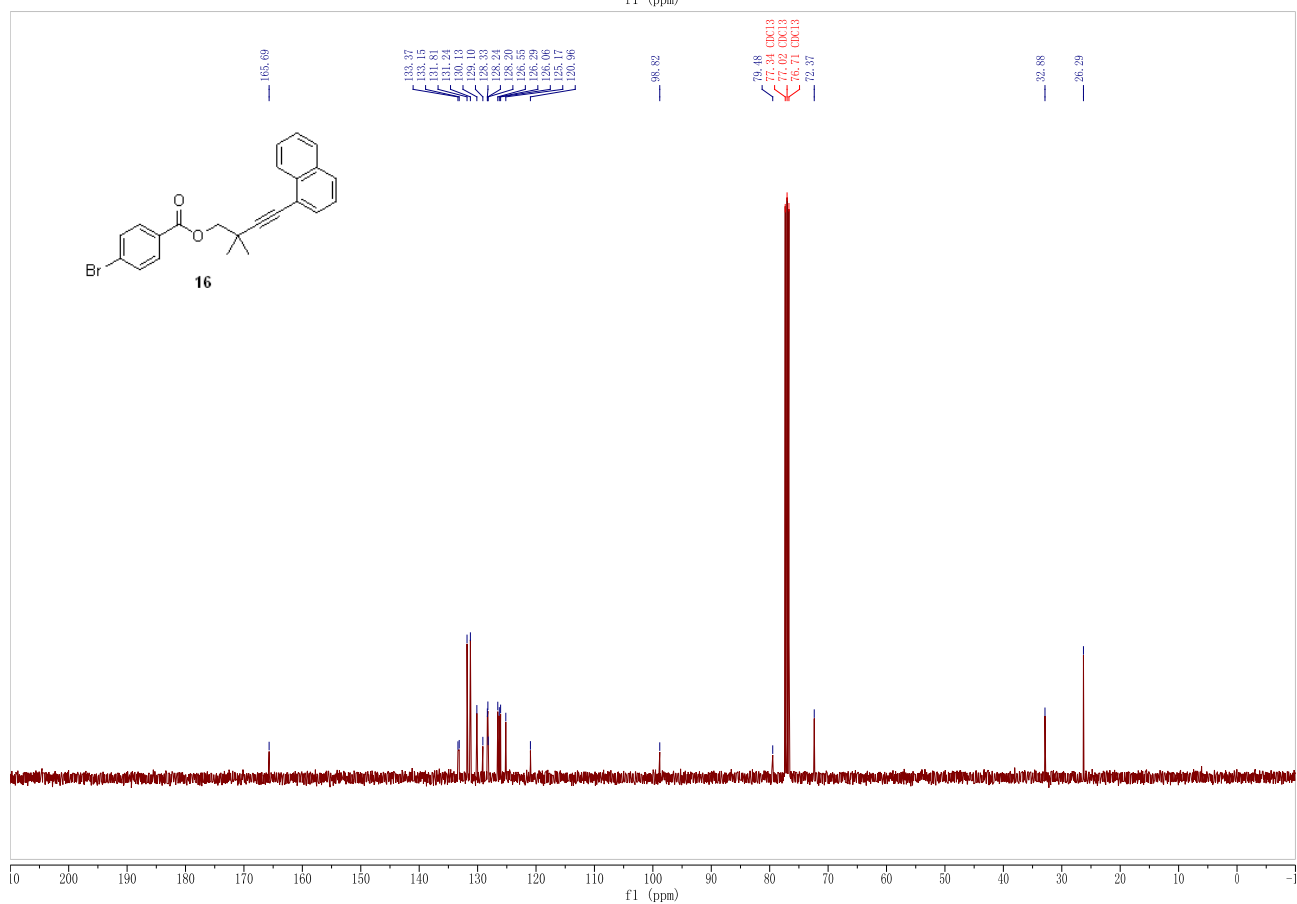

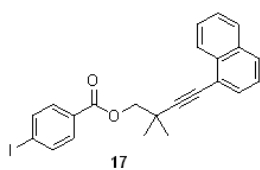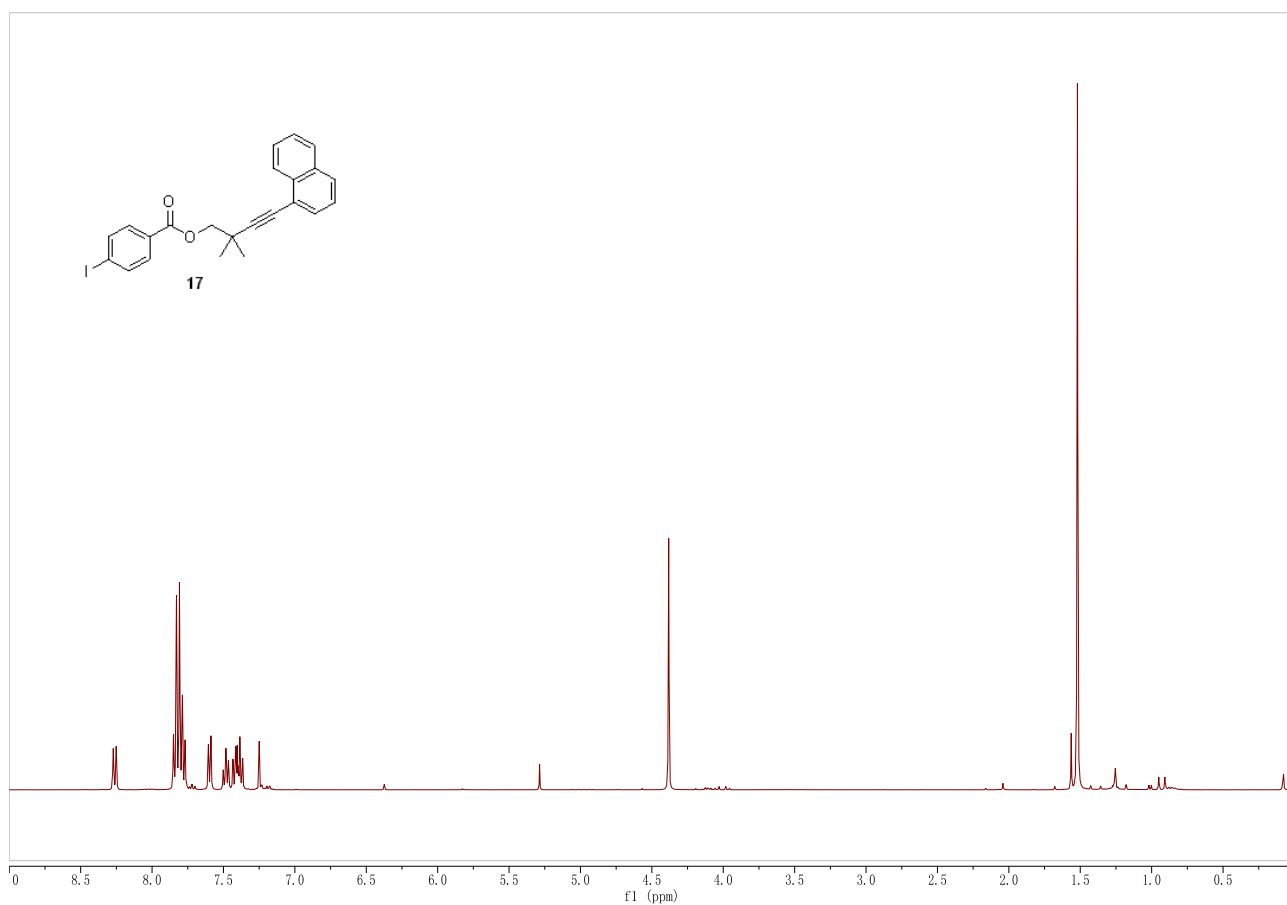

2012310VJ-VII-82-C0.11.f1d

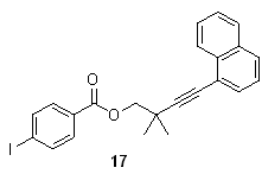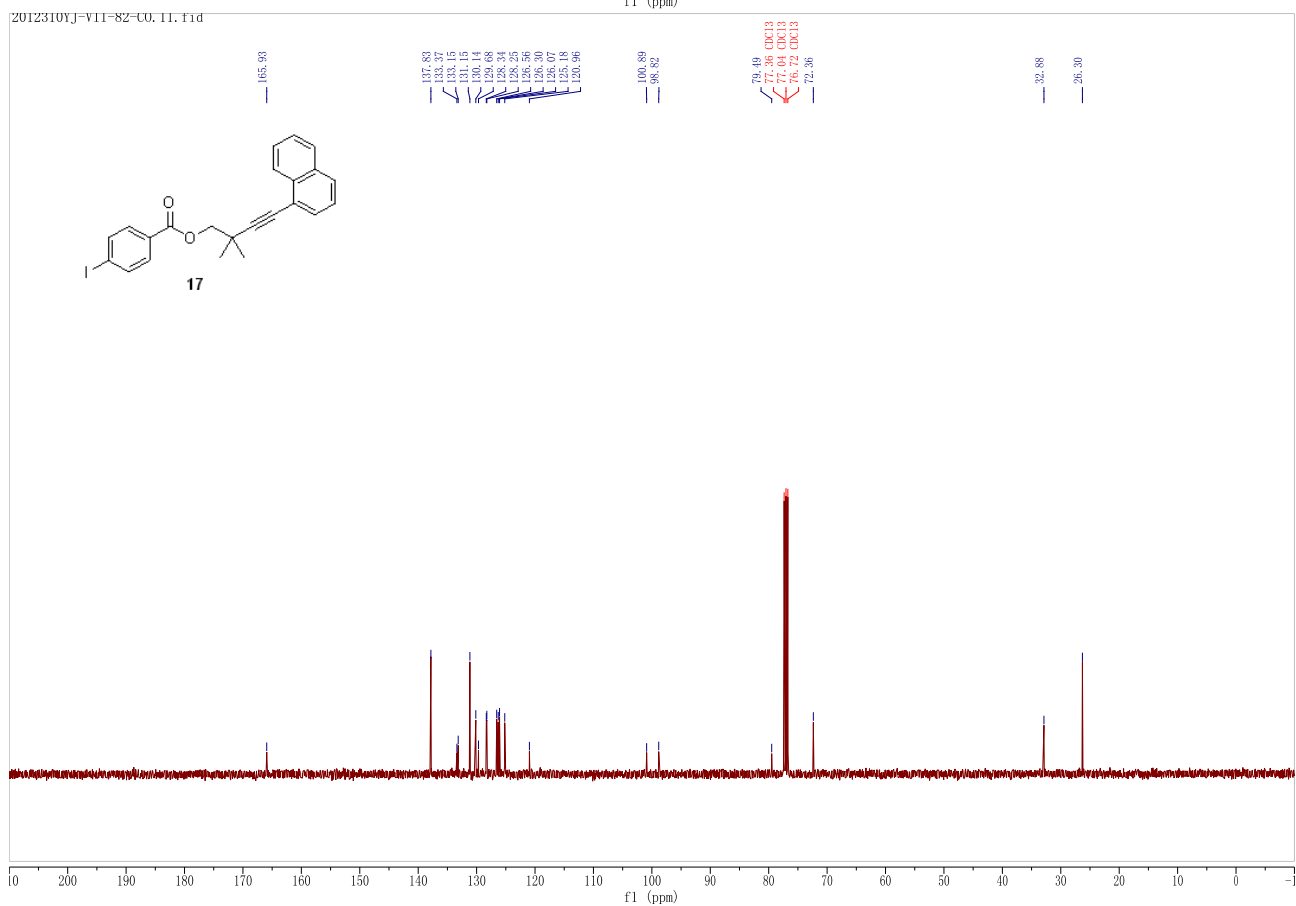

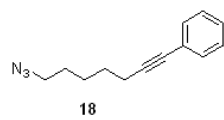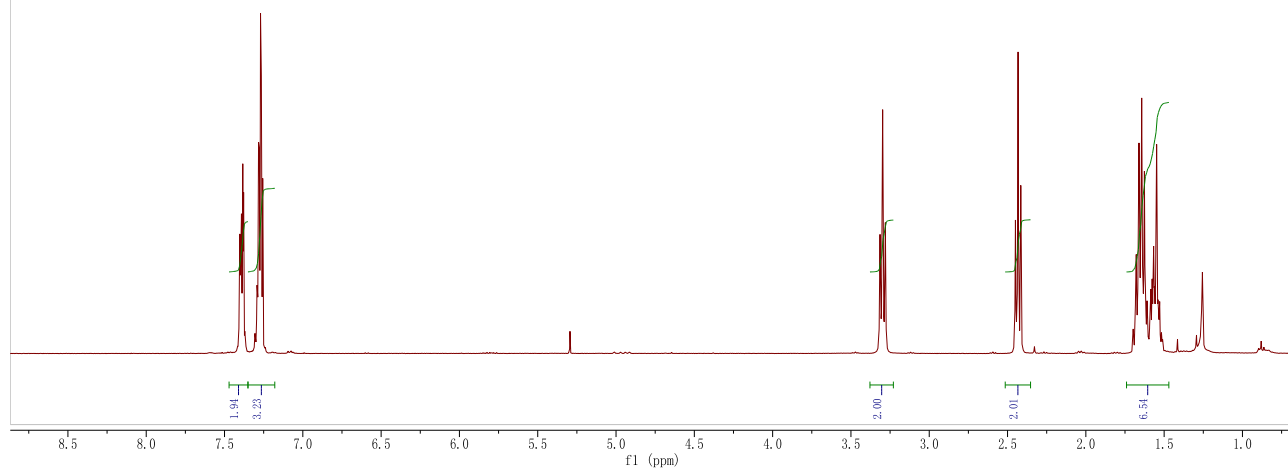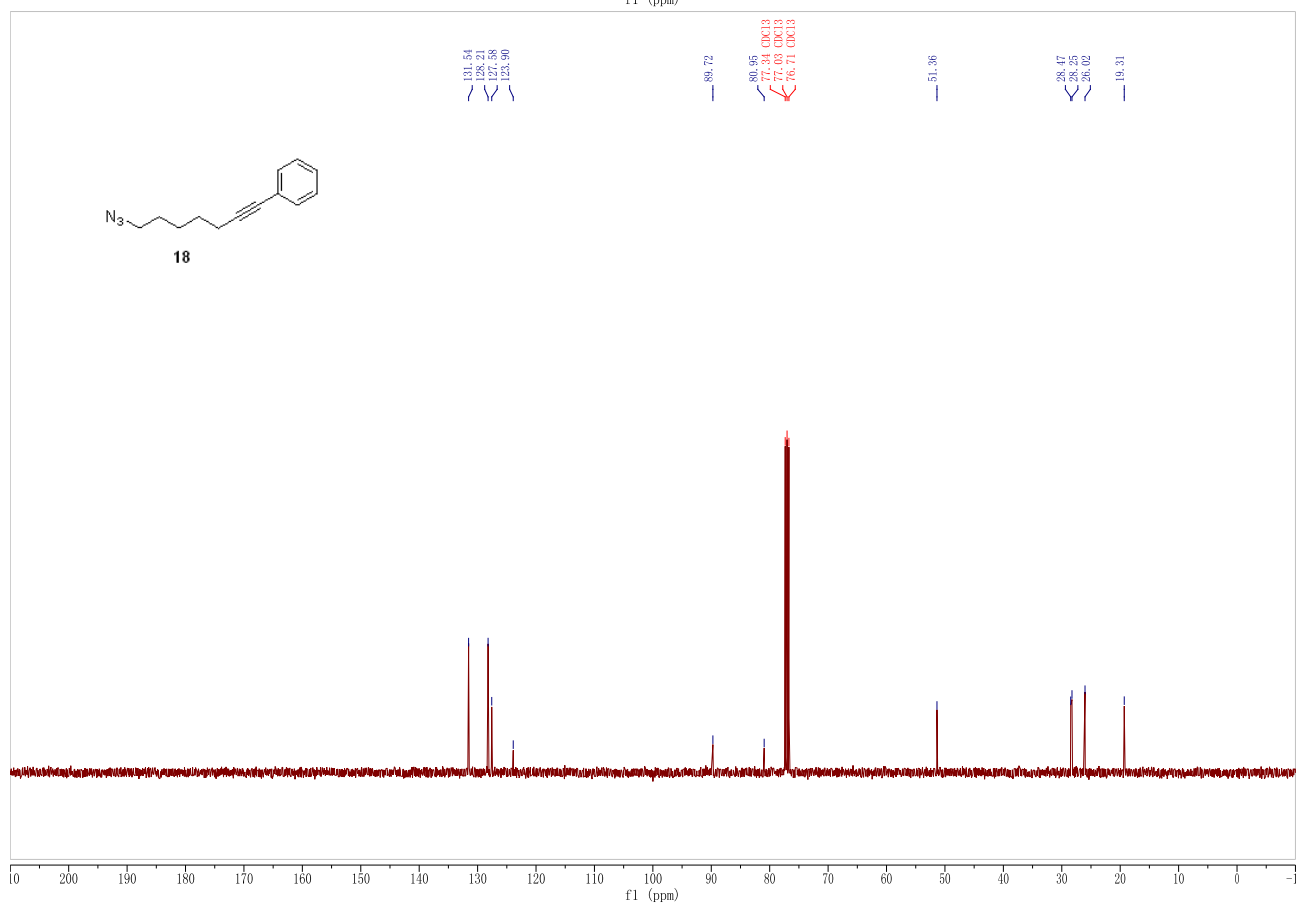

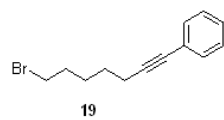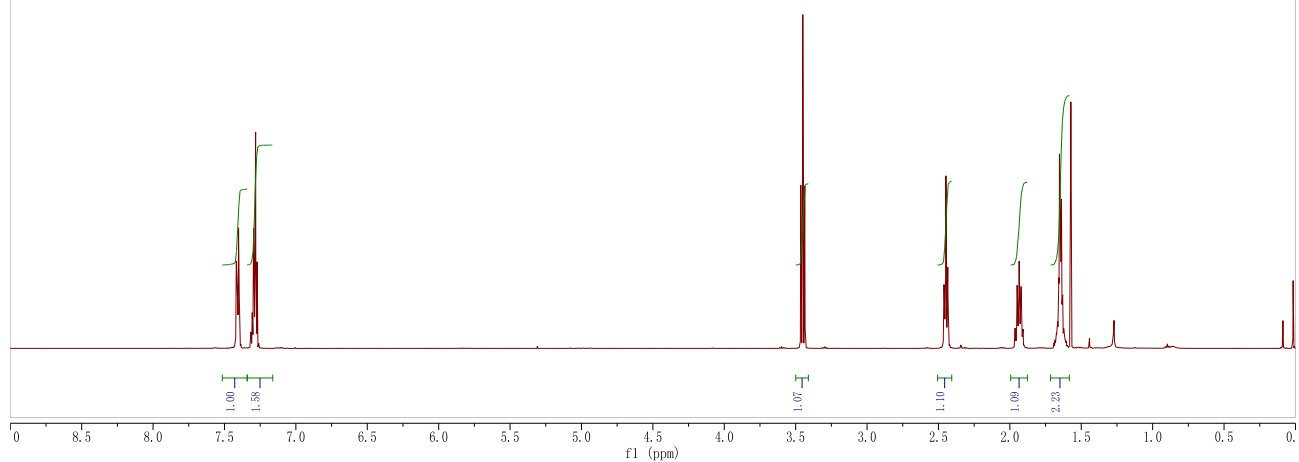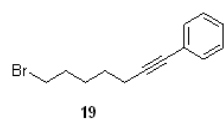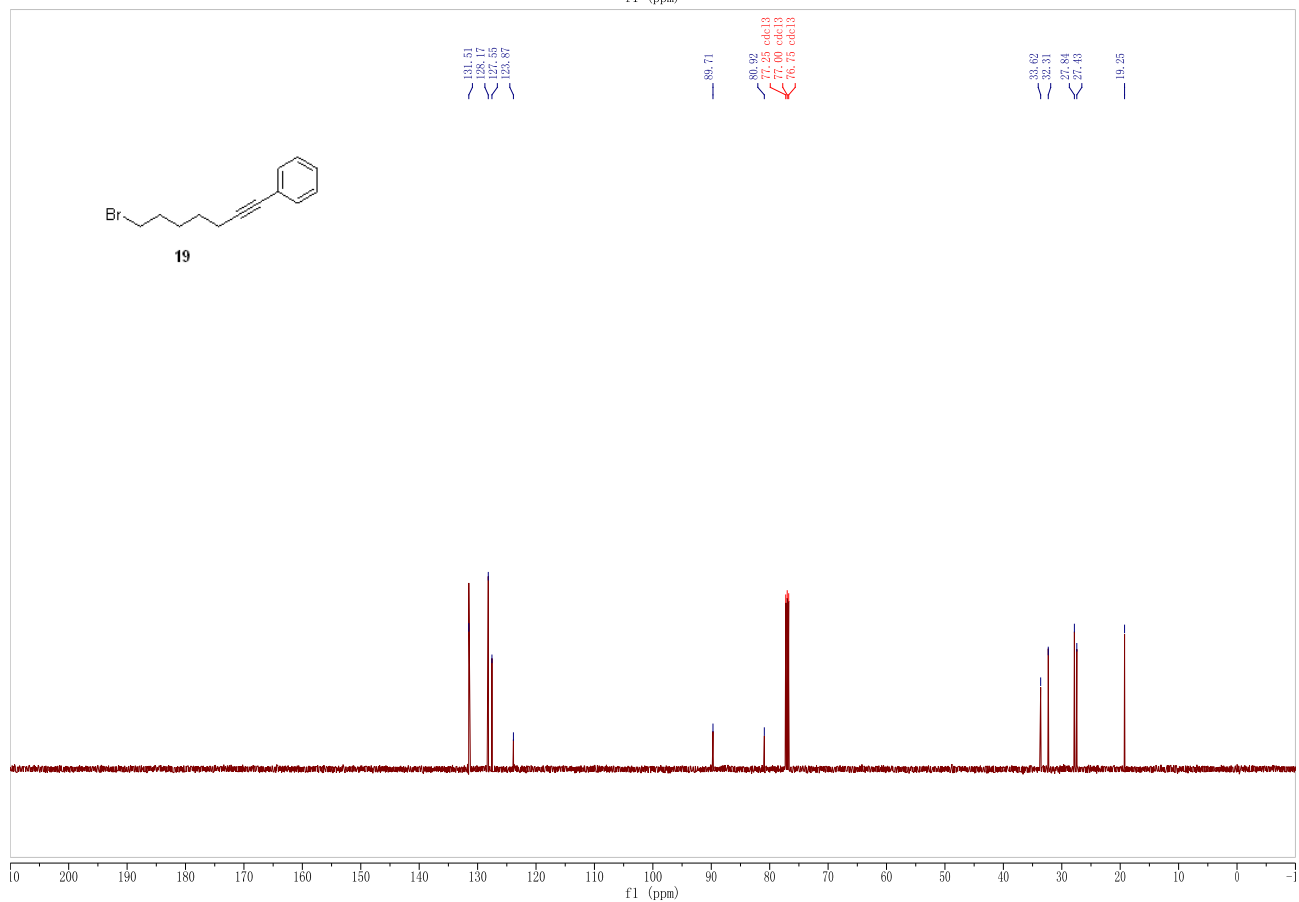

2012310YJ-10-74-CU\_PROTON\_01  
Gradient Shimming

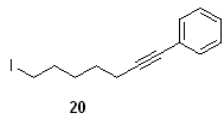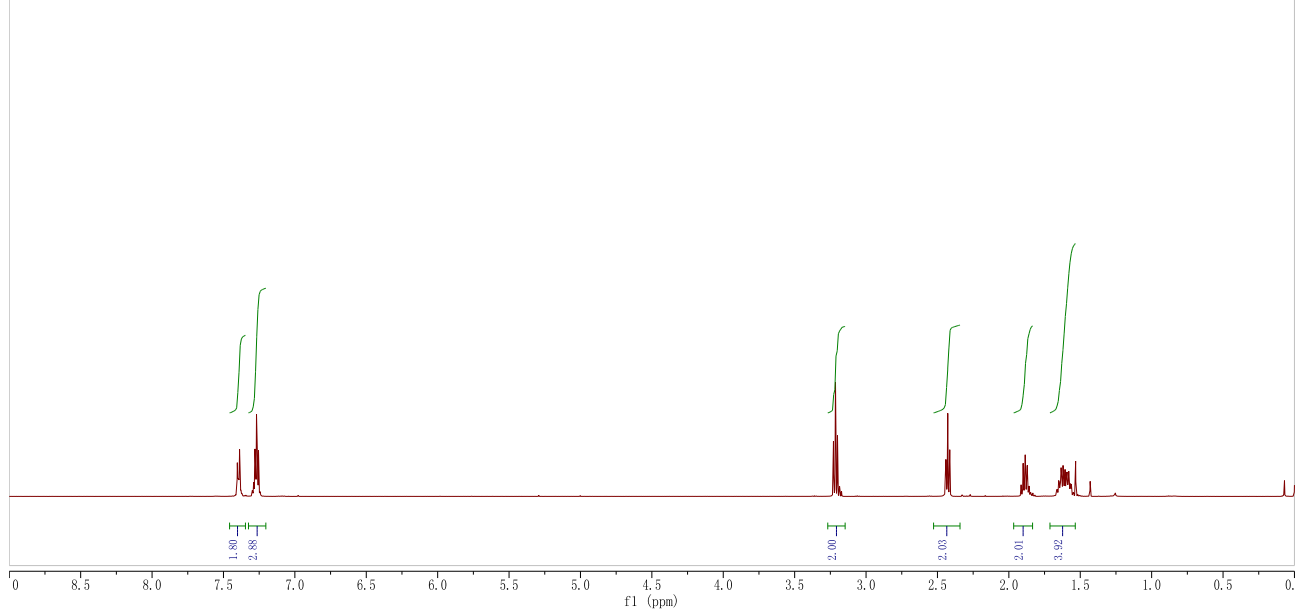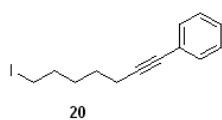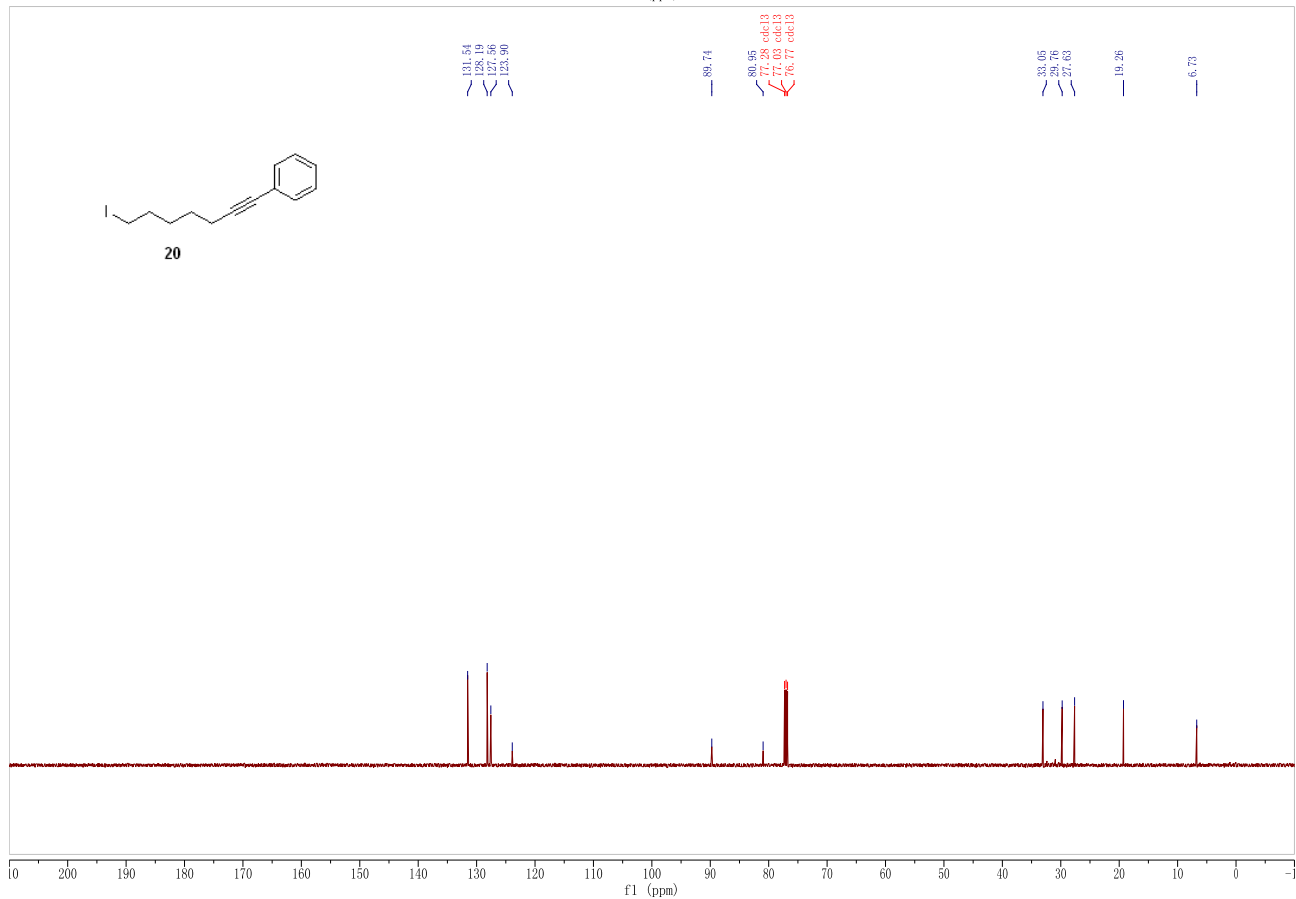

2012310YJ-1X-79-P, 10, f1d

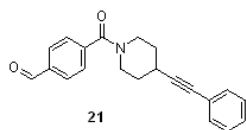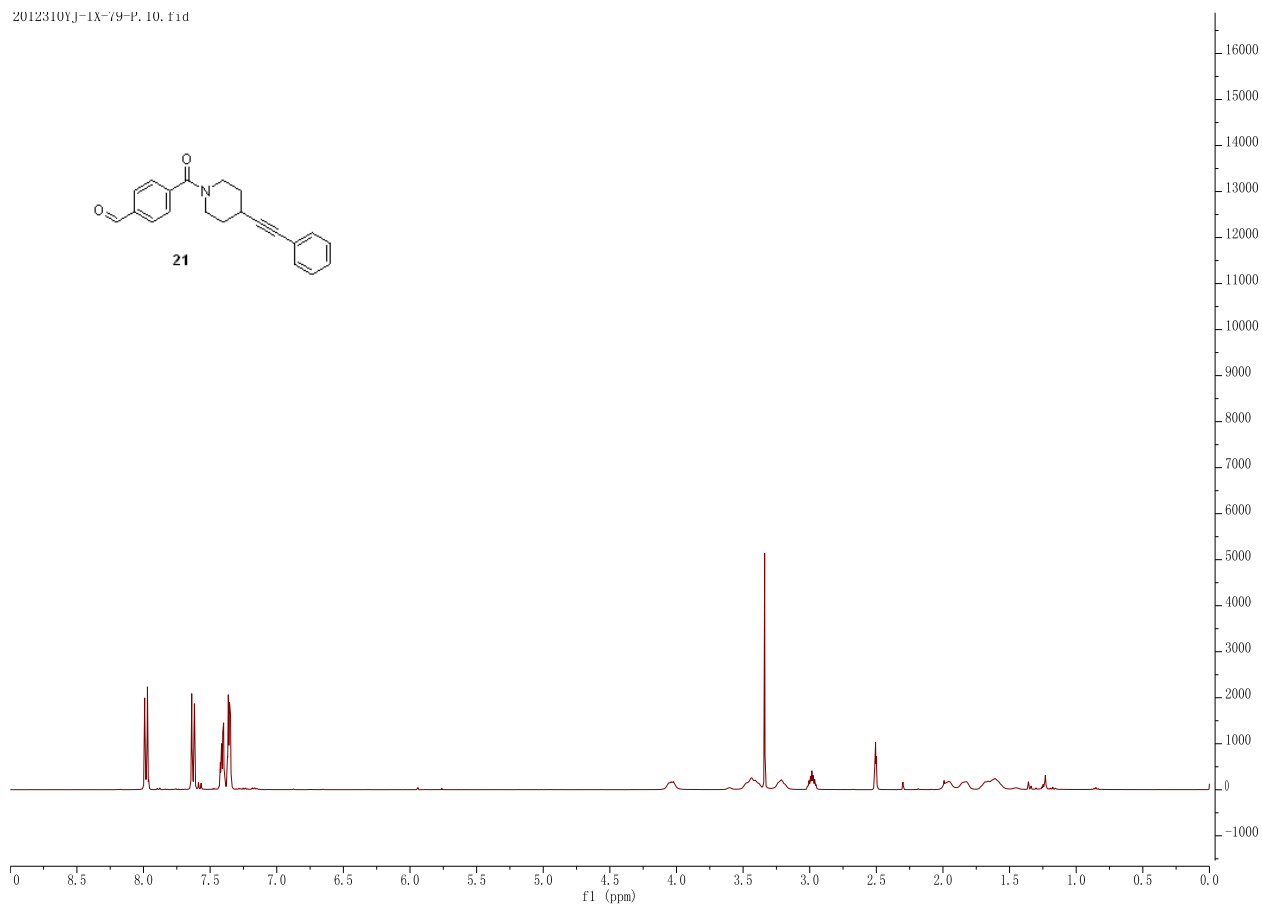

2012310YJ-1X-79-P, 11, f1d

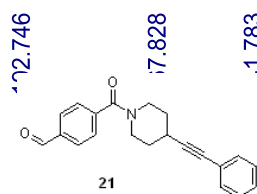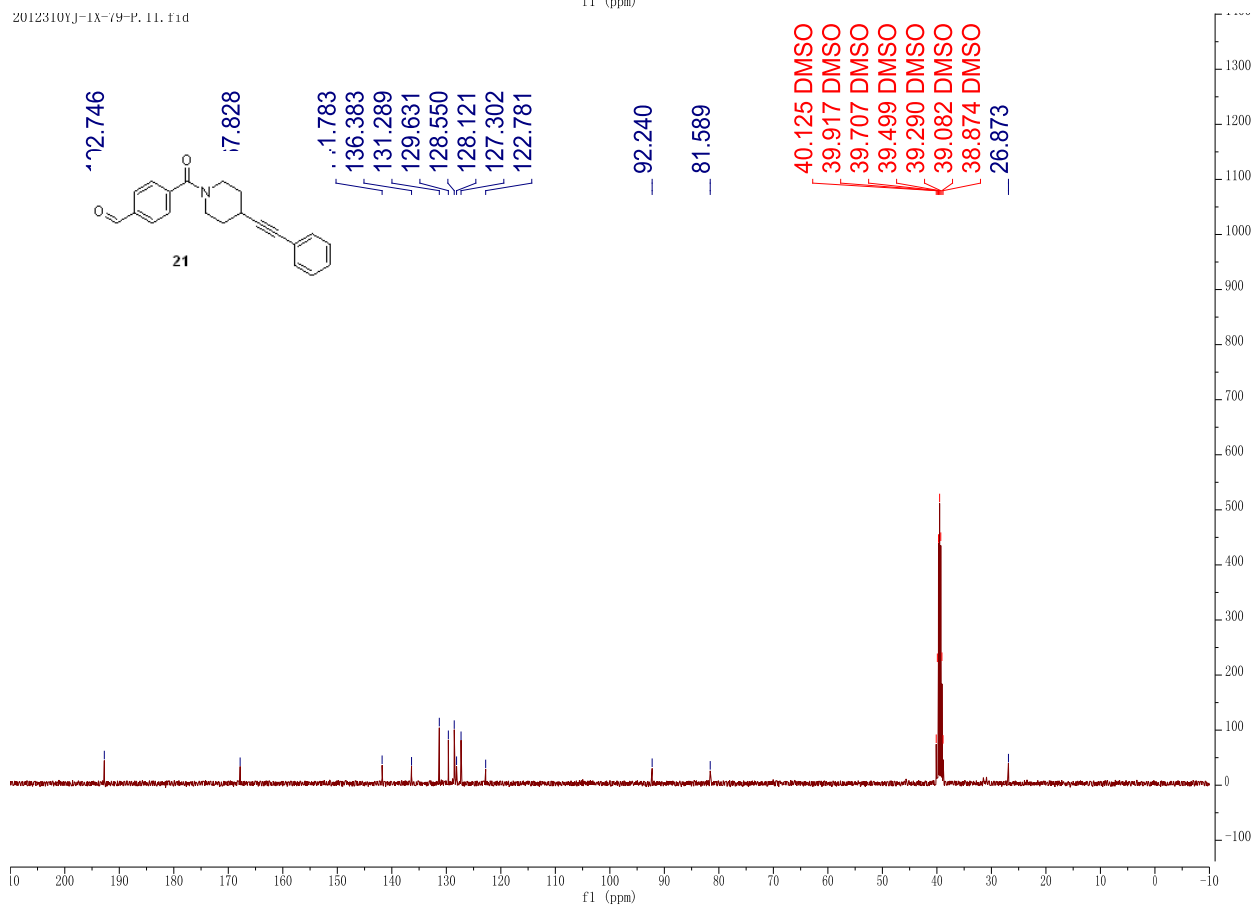

2012310VJ-VIII-057-H-CDC13, 10, T1d

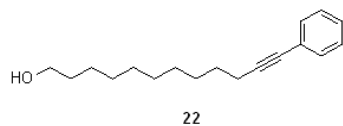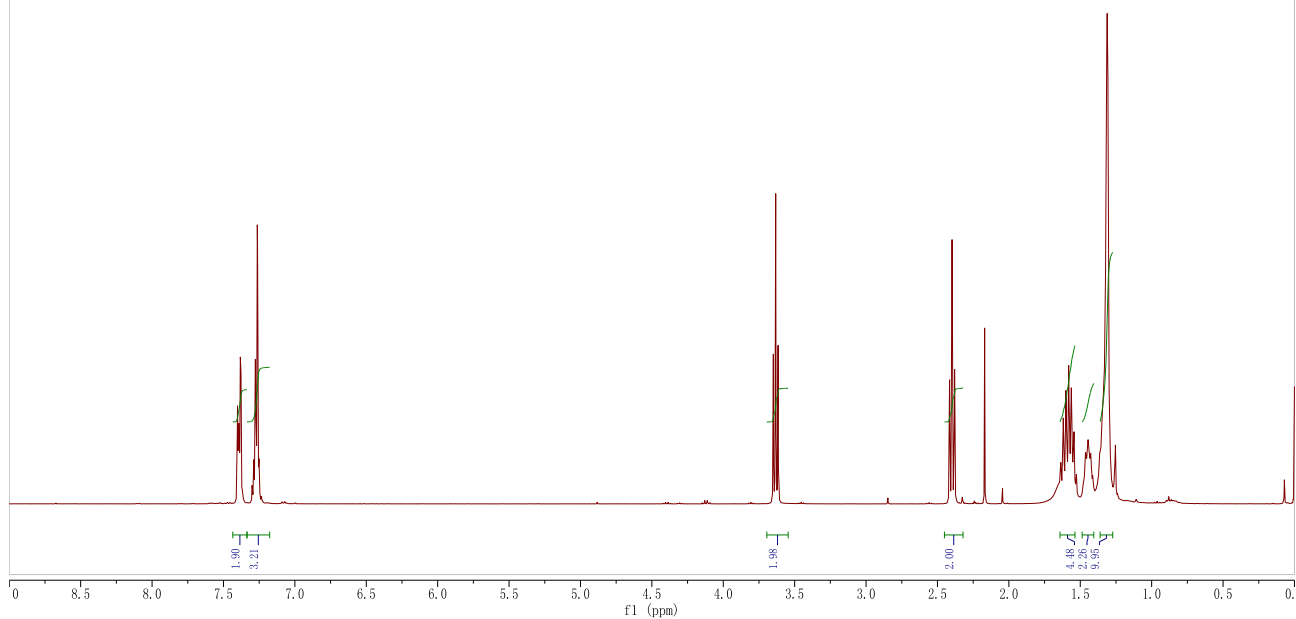

2012310VJ-VIII-057 CARBON\_01  
2012310VJ-VIII-57

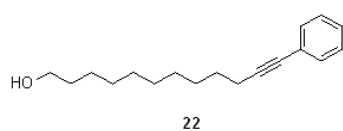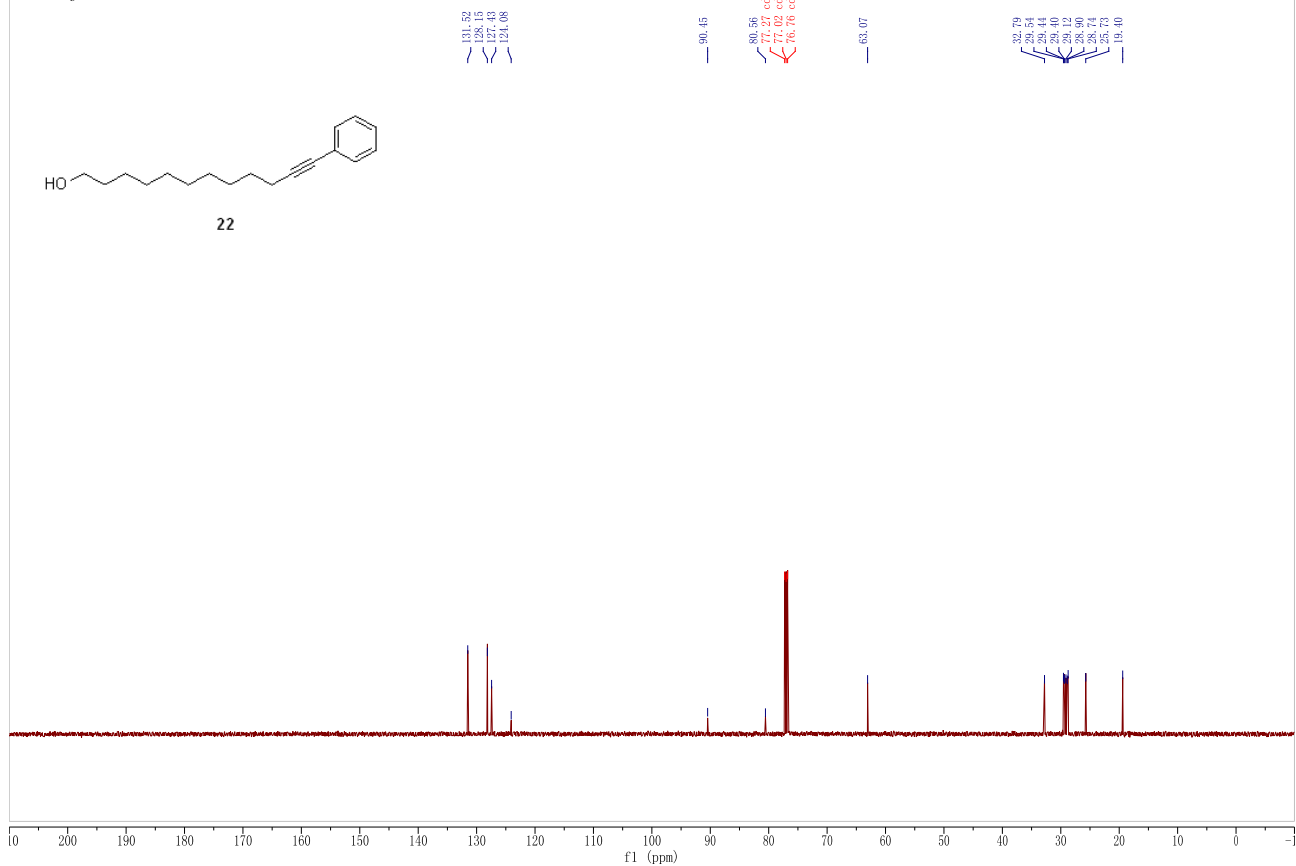



2012310VJ-VII-086-H\_C-PROTON\_01  
Gradient Shimming

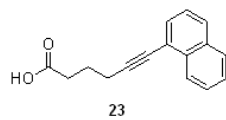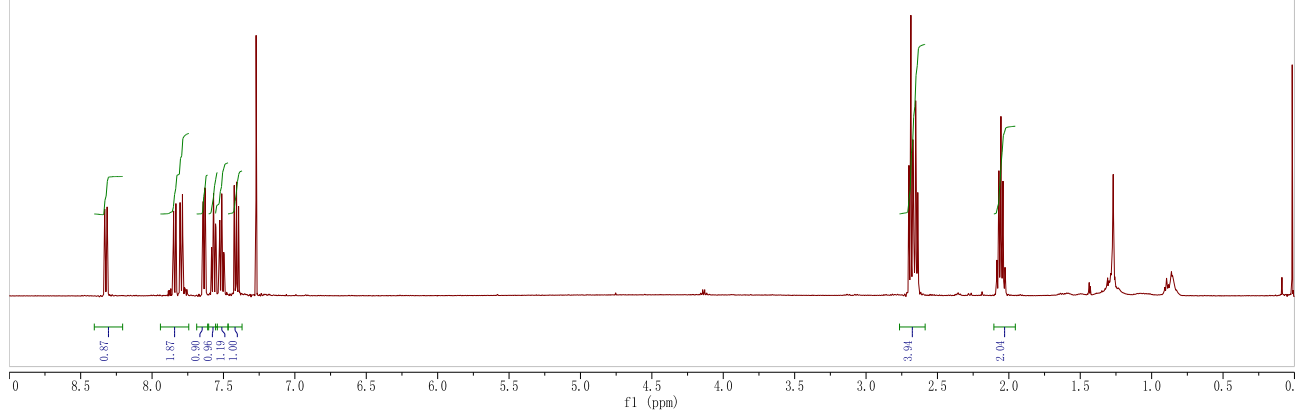

2012310VJ-VII-86-H\_C CARBON\_01  
2012310VJ-VII-86-H\_C

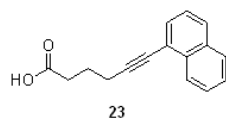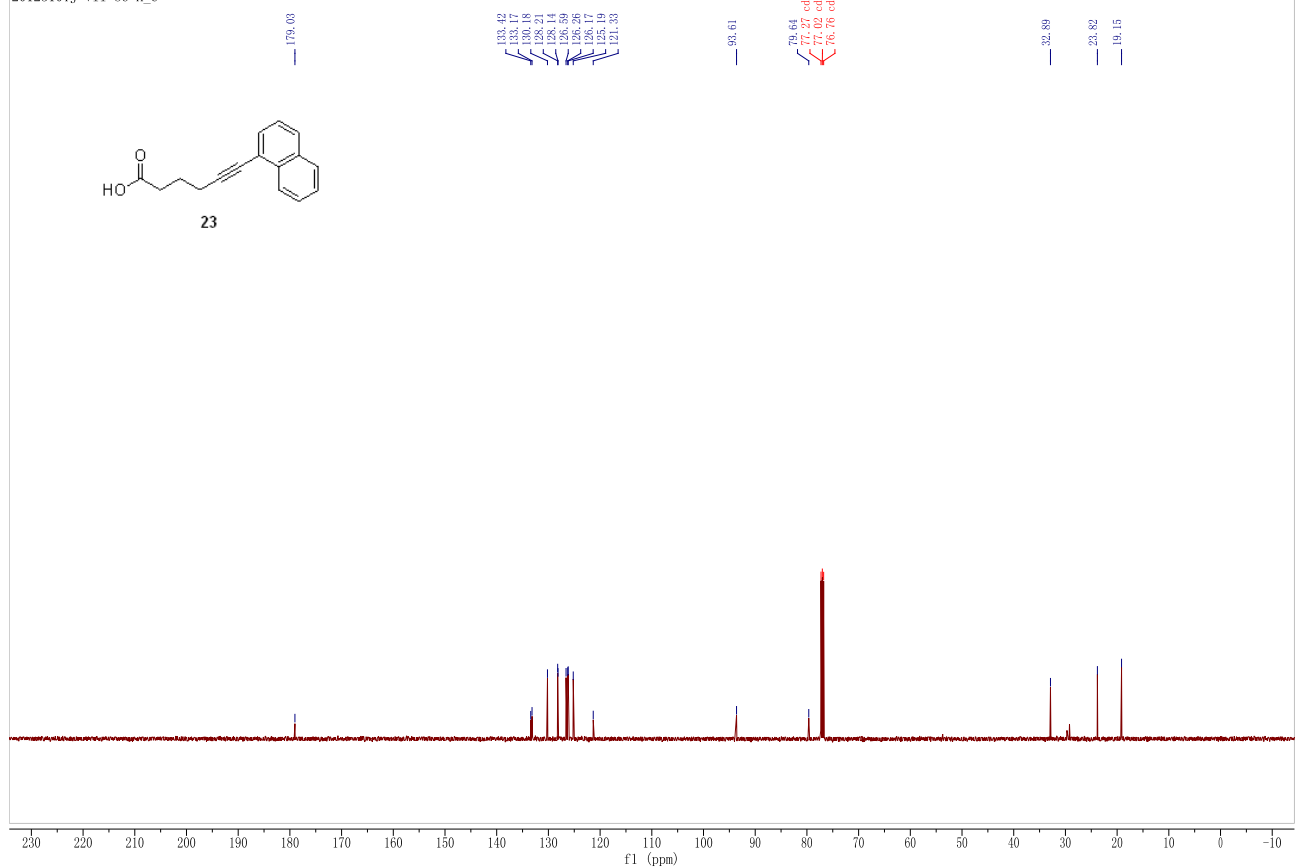

2012310VJ-10-93-H C

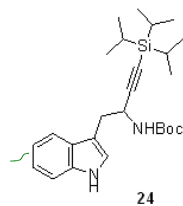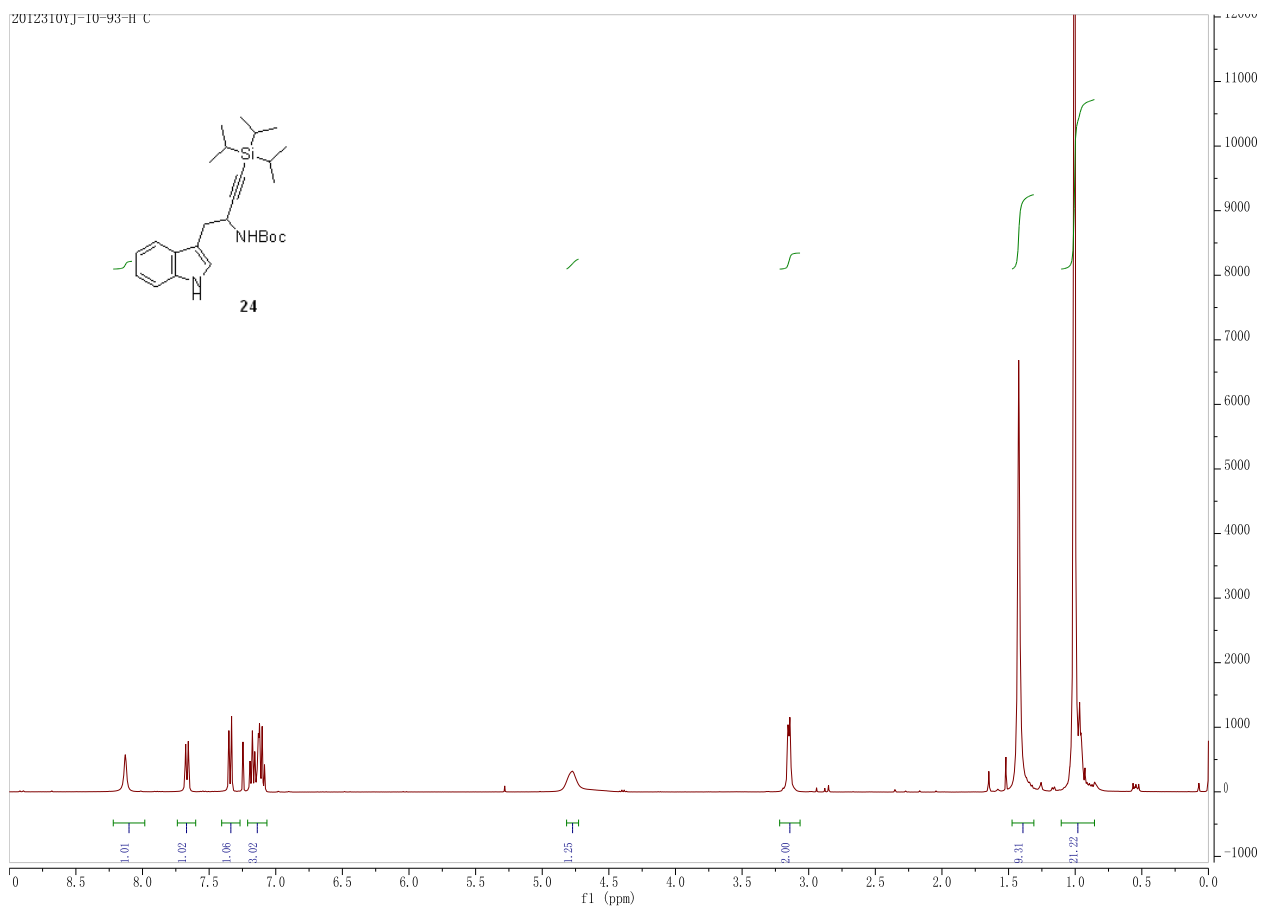

2012310VJ-10-93-H C

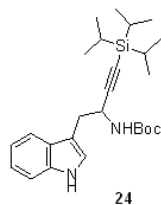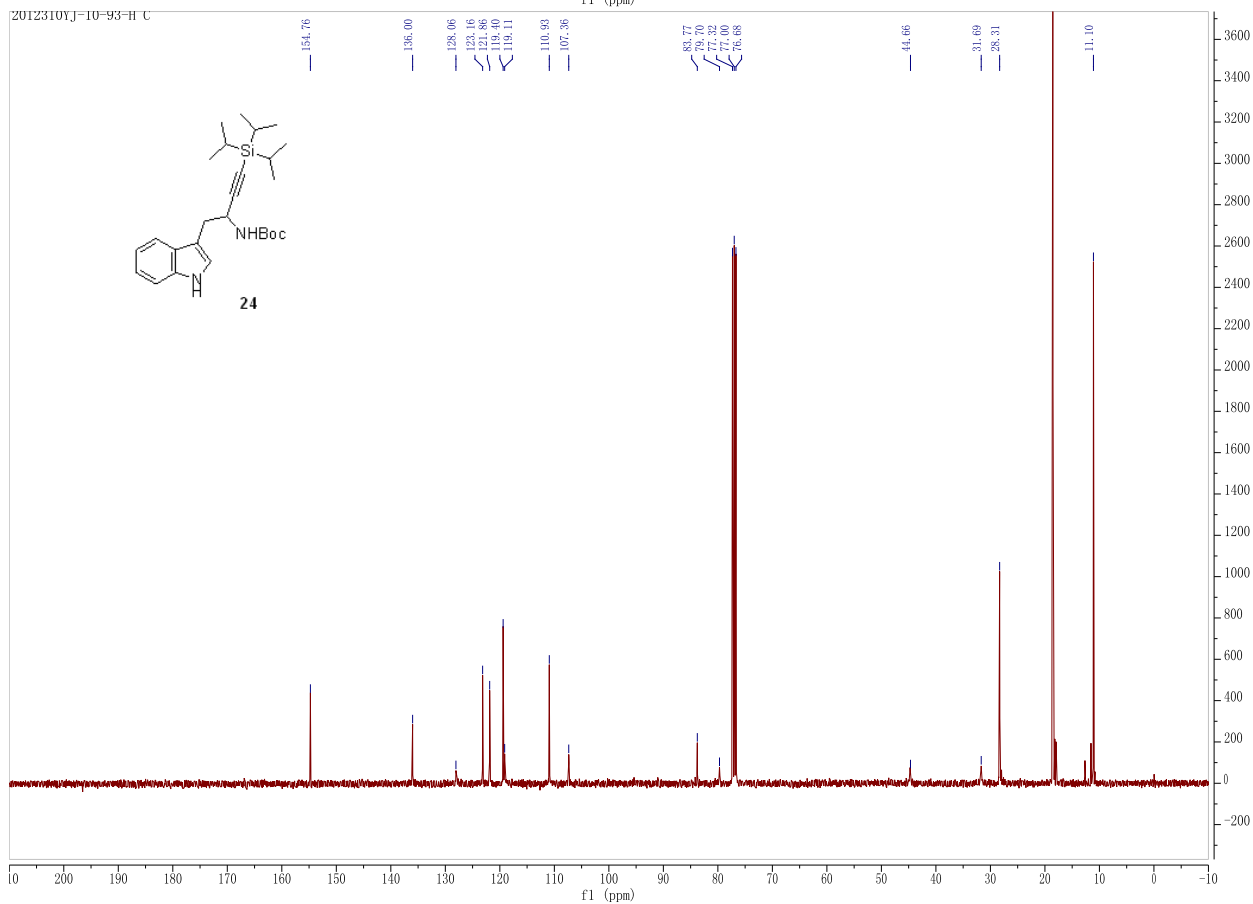

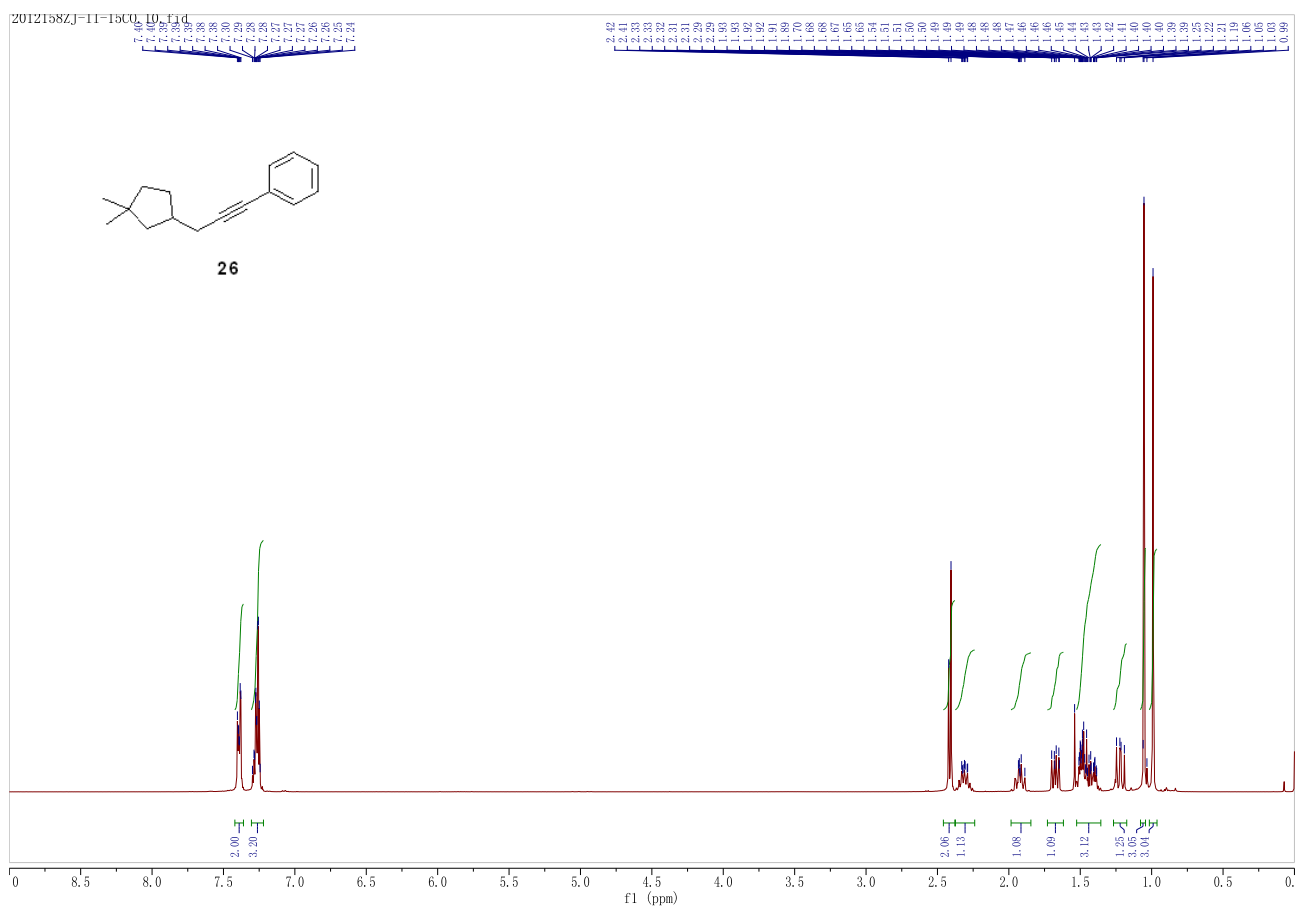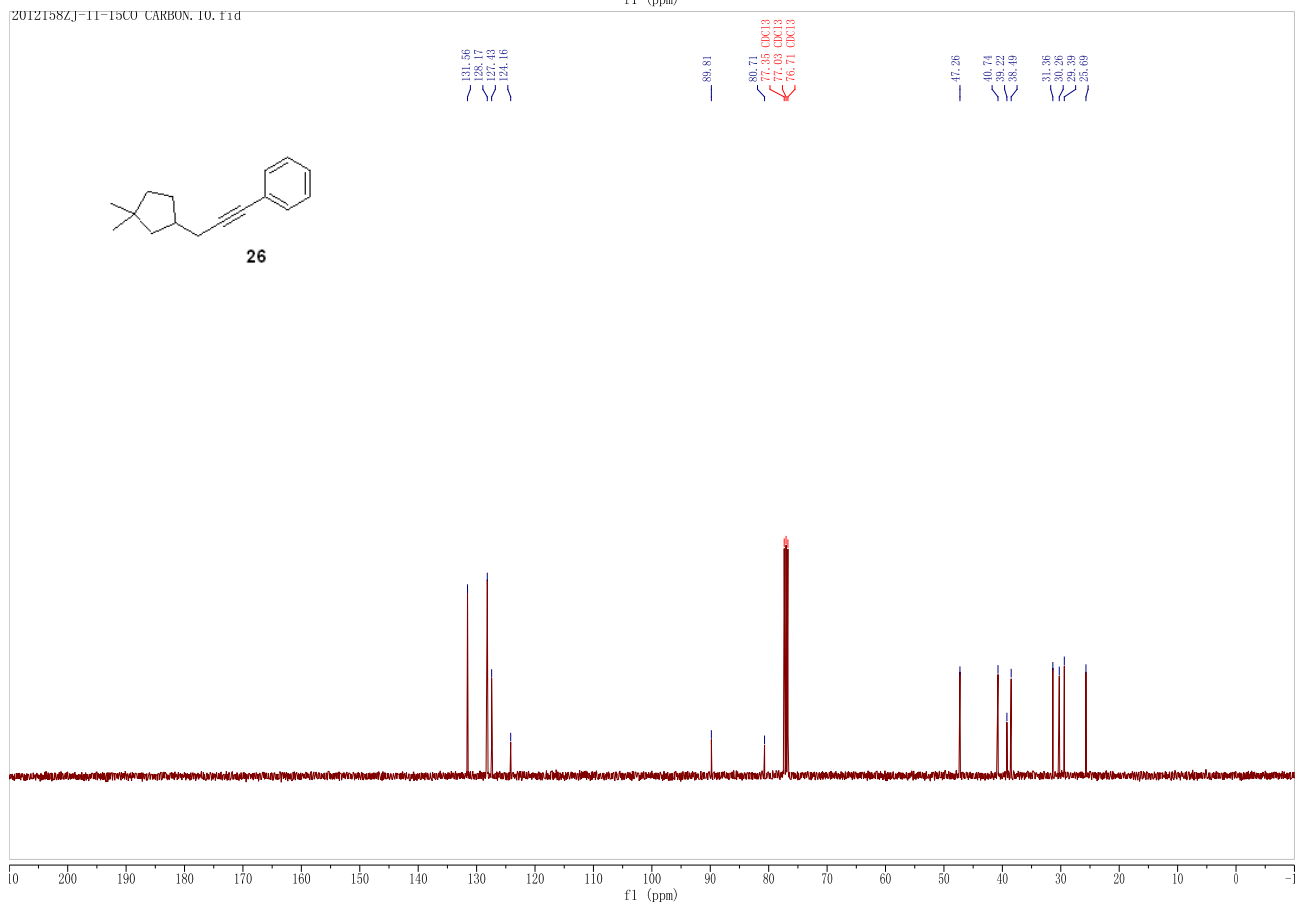

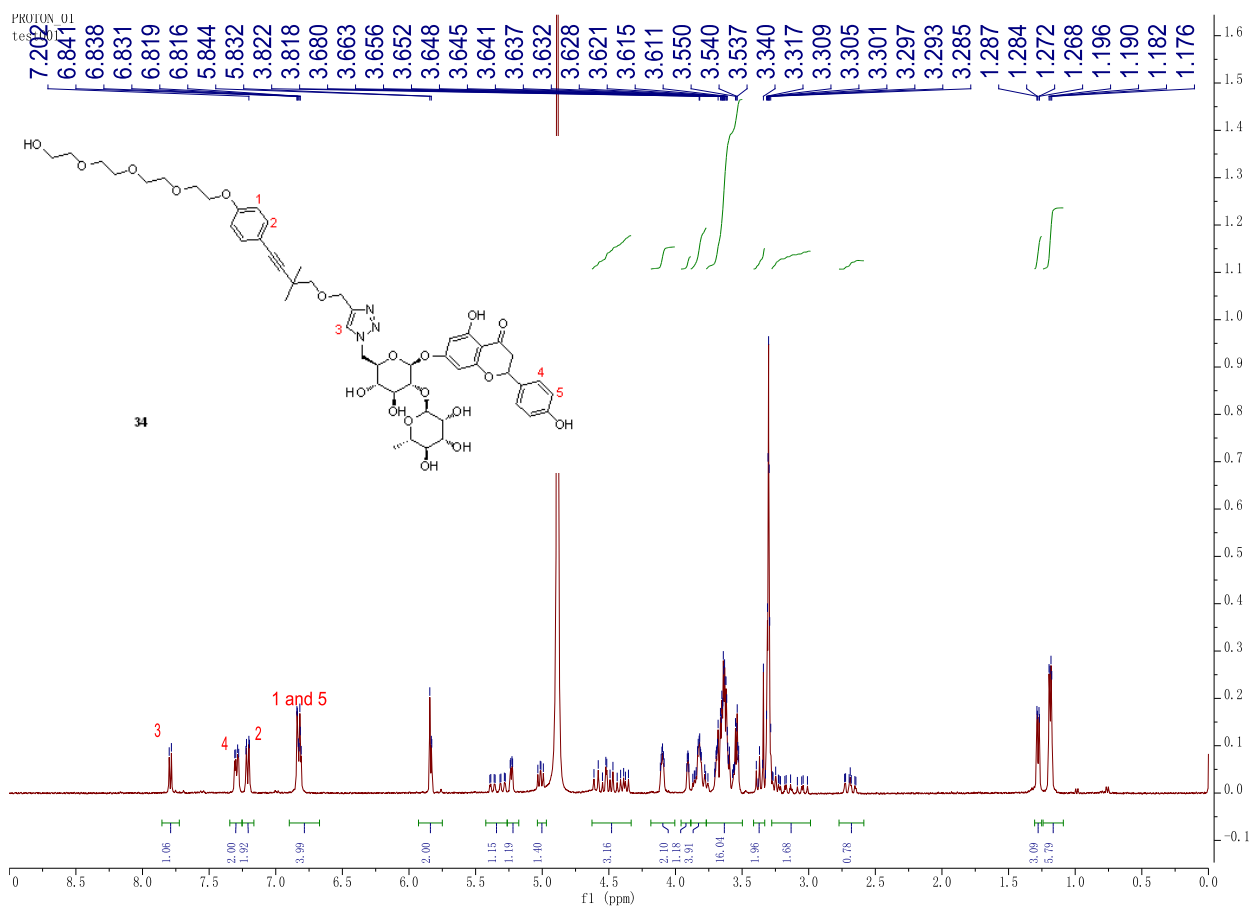

Supplement: c4cc06344a2.pdf [file c4cc06344a2.pdf]
